# Supplementary material for: N-Acylated and N-Alkylated 2-Aminobenzothiazoles Are Novel Agents That Suppress the Generation of Prostaglandin E2
Source: MDPI journal article supplement (doi:10.3390/biom12020267), 2022-02-07
Supplement: s1 [file s1]

# ***N*-Acylated and *N*-Alkylated 2-Aminobenzothiazoles are Novel Agents that Suppress the Generation of Prostaglandin E<sub>2</sub>**

Maria A. Theodoropoulou,<sup>1,2,#</sup> Anastasia Psarra,<sup>1,2,#</sup> Martin Erhardt,<sup>3</sup> Aikaterini Nikolaou,<sup>1,2</sup> Anna-Dimitra D. Gerogiannopoulou,<sup>1,2</sup> Dimitra Hadjipavlou-Litina,<sup>4</sup> Daiki Hayashi,<sup>5</sup> Edward A. Dennis,<sup>5</sup> Andrea Huwiler,<sup>3</sup> George Kokotos<sup>1,2,\*</sup>

<sup>1</sup>*Laboratory of Organic Chemistry, Department of Chemistry, National and Kapodistrian University of Athens, Panepistimiopolis, Athens 15771, Greece*

<sup>2</sup>*Center of Excellence for Drug Design and Discovery, National and Kapodistrian University of Athens, Athens 15771, Greece*

<sup>3</sup>*Institute of Pharmacology, University of Bern, CH-3010 Bern, Switzerland*

<sup>4</sup>*Department of Pharmaceutical Chemistry, School of Pharmacy, Aristotelian University of Thessaloniki, 54124 Thessaloniki, Greece*

<sup>5</sup>*Department of Chemistry and Biochemistry and Department of Pharmacology, School of Medicine, University of California, San Diego, La Jolla, California 92093-0601, USA*

<sup>#</sup>*These authors contributed equally.*

\*To whom correspondence should be addressed. For G.K.: phone: +30 210 7274462; fax: +30 210 7274761; E-mail: [gkokotos@chem.uoa.gr](mailto:gkokotos@chem.uoa.gr).

## **SUPPLEMENTARY MATERIALS**

## Contents

|                                                                                                               | Page      |
|---------------------------------------------------------------------------------------------------------------|-----------|
| <b>Table S1. Names and code numbers of tested compounds.</b>                                                  | <b>2</b>  |
| <b>Figure S1. Effect of the inhibitor 19a on IL-1/Fk-stimulated nitrite formation in rat mesangial cells.</b> | <b>4</b>  |
| <b><sup>1</sup>H NMR and <sup>13</sup>C NMR spectra of the compounds synthesized.</b>                         | <b>5</b>  |
| <b>HPLC traces of 5b, 11, 19a, 19b, 19c, 19d, 19e, 23a and 23c.</b>                                           | <b>40</b> |

**Table S1.** Names and code numbers of tested compounds.

| Compound chemical name                                                                     | No         | Code number |
|--------------------------------------------------------------------------------------------|------------|-------------|
| <i>N</i> -(Benzo[ <i>d</i> ]thiazol-2-yl)-4-(naphthalen-2-yl)butanamide                    | <b>5a</b>  | GK509       |
| <i>N</i> -(Benzo[ <i>d</i> ]thiazol-2-yl)-3-(naphthalen-2-yl)propanamide                   | <b>5b</b>  | GK510       |
| <i>N</i> -(Benzo[ <i>d</i> ]oxazol-2-yl)-3-(naphthalen-2-yl)propanamide                    | <b>5c</b>  | GK538       |
| <i>N</i> -(Benzo[ <i>d</i> ]oxazol-2-yl)-4-(naphthalen-2-yl)butanamide                     | <b>5d</b>  | GK540       |
| <i>N</i> -(1 <i>H</i> -Benzo[ <i>d</i> ]imidazol-2-yl)-3-(naphthalen-2-yl)propanamide      | <b>5e</b>  | GK539       |
| <i>N</i> -(1 <i>H</i> -Benzo[ <i>d</i> ]imidazol-2-yl)-4-(naphthalen-2-yl)butanamide       | <b>5f</b>  | GK541       |
| <i>N</i> -(Benzo[ <i>d</i> ]thiazol-2-yl)-2-(naphthalen-2-yloxy)acetamide                  | <b>7</b>   | GK591       |
| ( <i>E</i> )- <i>N</i> -(Benzo[ <i>d</i> ]thiazol-2-yl)-3-(naphthalen-2-yl)acrylamide      | <b>9a</b>  | GK522       |
| ( <i>E</i> )- <i>N</i> -(Benzo[ <i>d</i> ]thiazol-2-yl)-3-(4-methoxyphenyl)acrylamide      | <b>9b</b>  | GK523       |
| <i>N</i> -(Benzo[ <i>d</i> ]thiazol-2-yl)-3-(4-methoxyphenyl)propanamide                   | <b>11</b>  | GK521       |
| <i>N</i> -(3-(Naphthalen-2-yl)propyl)benzo[ <i>d</i> ]thiazole-2-carboxamide               | <b>14</b>  | GK508       |
| 4-Methoxybenzyl benzo[ <i>d</i> ]thiazol-2-ylcarbamate                                     | <b>16a</b> | GK524       |
| Naphthalen-2-ylmethyl benzo[ <i>d</i> ]thiazol-2-ylcarbamate                               | <b>16b</b> | GK525       |
| <i>N</i> -(1-Methoxy-3-(naphthalen-2-yl)propyl)benzo[ <i>d</i> ]thiazol-2-amine            | <b>18a</b> | GK542       |
| <i>N</i> -(1-Methoxy-3-phenylpropyl)benzo[ <i>d</i> ]thiazol-2-amine                       | <b>18b</b> | GK561       |
| <i>N</i> -(1-Methoxy-3-(4-methoxyphenyl)propyl)benzo[ <i>d</i> ]thiazol-2-amine            | <b>18c</b> | GK559       |
| <i>N</i> -(3-(Naphthalen-2-yl)propyl)benzo[ <i>d</i> ]thiazol-2-amine                      | <b>19a</b> | GK543       |
| <i>N</i> -(3-Phenylpropyl)benzo[ <i>d</i> ]thiazol-2-amine                                 | <b>19b</b> | GK562       |
| <i>N</i> -(3-(4-Methoxyphenyl)propyl)benzo[ <i>d</i> ]thiazol-2-amine                      | <b>19c</b> | GK560       |
| <i>N</i> -(3-(Naphthalen-1-yl)propyl)benzo[ <i>d</i> ]thiazol-2-amine                      | <b>19d</b> | GK593       |
| <i>N</i> -(3-(Naphthalen-1-yl)propyl)thiazol-2-amine                                       | <b>19e</b> | GK610       |
| <i>N</i> -(3-Phenylpropyl)thiazol-2-amine                                                  | <b>19f</b> | GK643       |
| <i>N</i> -(3-(Naphthalen-2-yl)propyl)-6-(trifluoromethoxy)benzo[ <i>d</i> ]thiazol-2-amine | <b>19g</b> | GK642       |
| <i>N</i> -(3-(Naphthalen-1-yl)propyl)-6-(trifluoromethoxy)benzo[ <i>d</i> ]thiazol-2-amine | <b>19h</b> | GK644       |

|                                                                         |            |       |
|-------------------------------------------------------------------------|------------|-------|
| <i>N</i> -(3-(Naphthalen-2-yl)propyl)benzo[ <i>d</i> ]oxazol-2-amine    | <b>23a</b> | GK566 |
| <i>N</i> -(3-(4-Methoxyphenyl)propyl)benzo[ <i>d</i> ]oxazol-2-amine    | <b>23b</b> | GK567 |
| <i>N</i> -(2-(Naphthalen-2-yloxy)ethyl)benzo[ <i>d</i> ]oxazol-2-amine  | <b>23c</b> | GK592 |
| <i>N</i> -(2-(Naphthalen-1-yloxy)ethyl)benzo[ <i>d</i> ]oxazol-2-amine  | <b>23d</b> | GK604 |
| <i>N</i> -(2-(Naphthalen-2-yloxy)ethyl)benzo[ <i>d</i> ]thiazol-2-amine | <b>25a</b> | GK606 |
| <i>N</i> -(2-(Naphthalen-1-yloxy)ethyl)benzo[ <i>d</i> ]thiazol-2-amine | <b>25b</b> | GK607 |

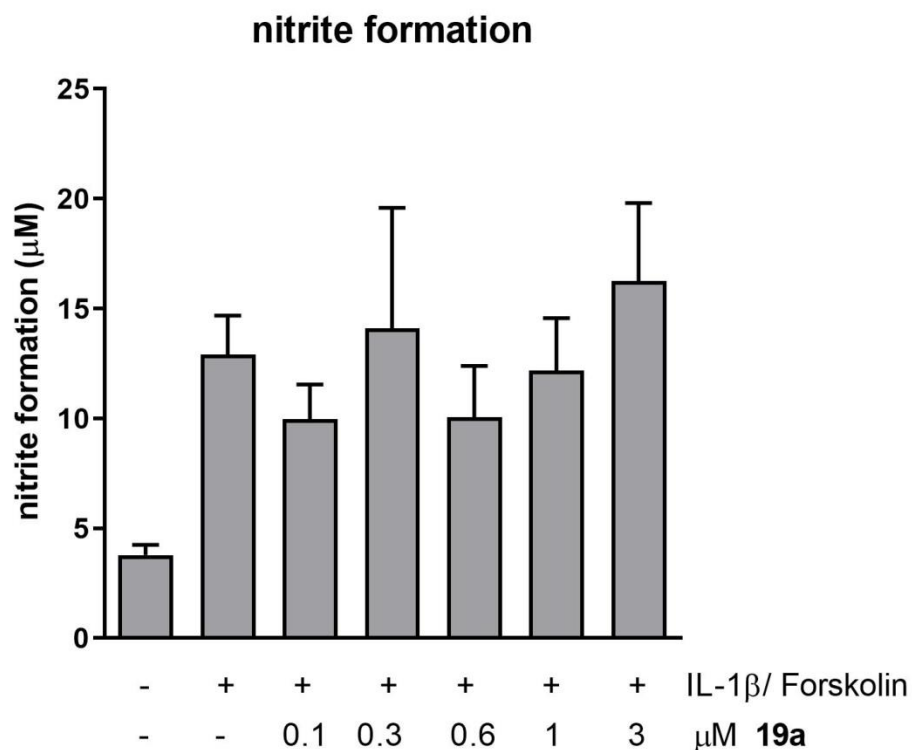

**Figure S1.** Effect of the inhibitor **19a** on IL-1/Fk-stimulated nitrite formation in rat mesangial cells.

Cells were pretreated for 20 min with the indicated concentrations of **19a** and then stimulated for 24 h in the absence (-) or presence (+) of 1 nM interleukin 1 $\beta$  (IL-1) plus 5  $\mu$ M forskolin (Fk). Nitrite was quantified in supernatants using Griess assay as previously described.<sup>1</sup> Data are presented as mM of nitrite and are means  $\pm$  S.D. (n = 3).

## References

1. Mühl, H.; Kunz, D.; Rob, P.; Pfeilschifter, J. Cyclosporin derivatives inhibit interleukin 1 $\beta$  induction of nitric oxide synthase in renal mesangial cells. *Eur. J. Pharmacol.* **1993**, 249, 95-100.

# NMR Spectra

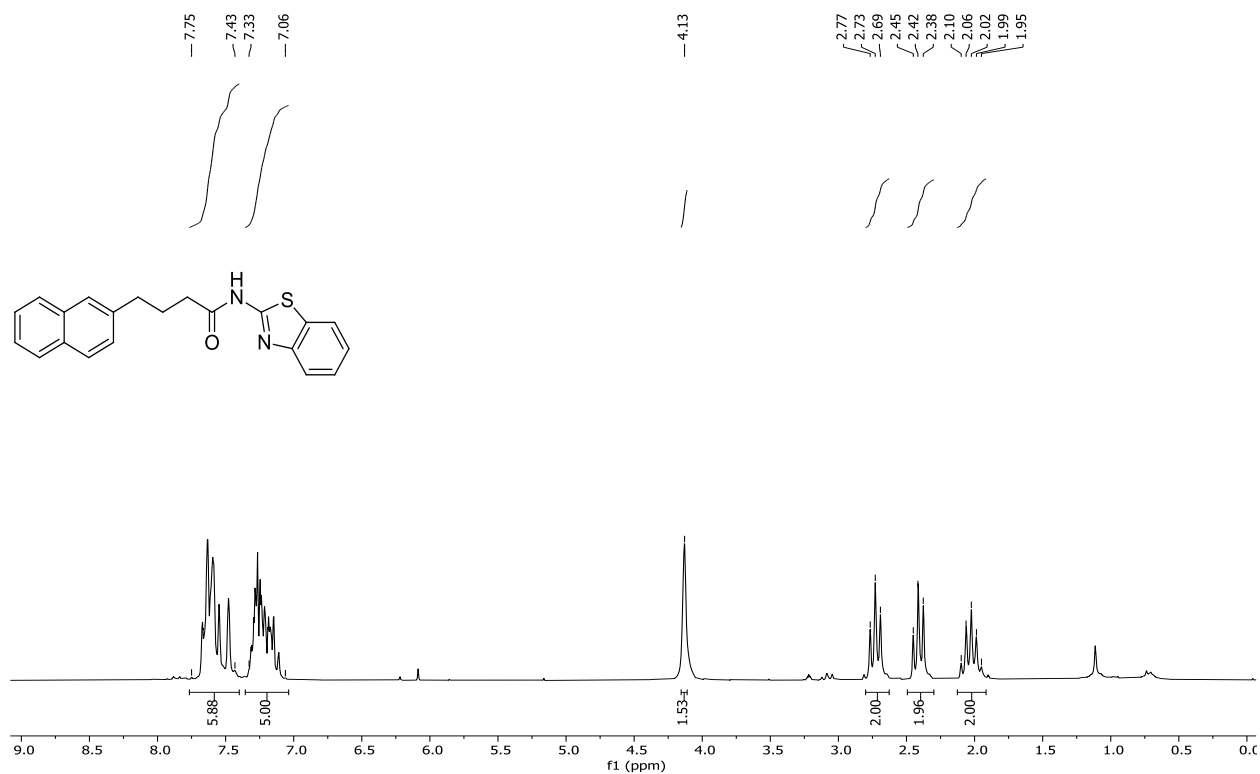

<sup>1</sup>H NMR spectrum of 5a.

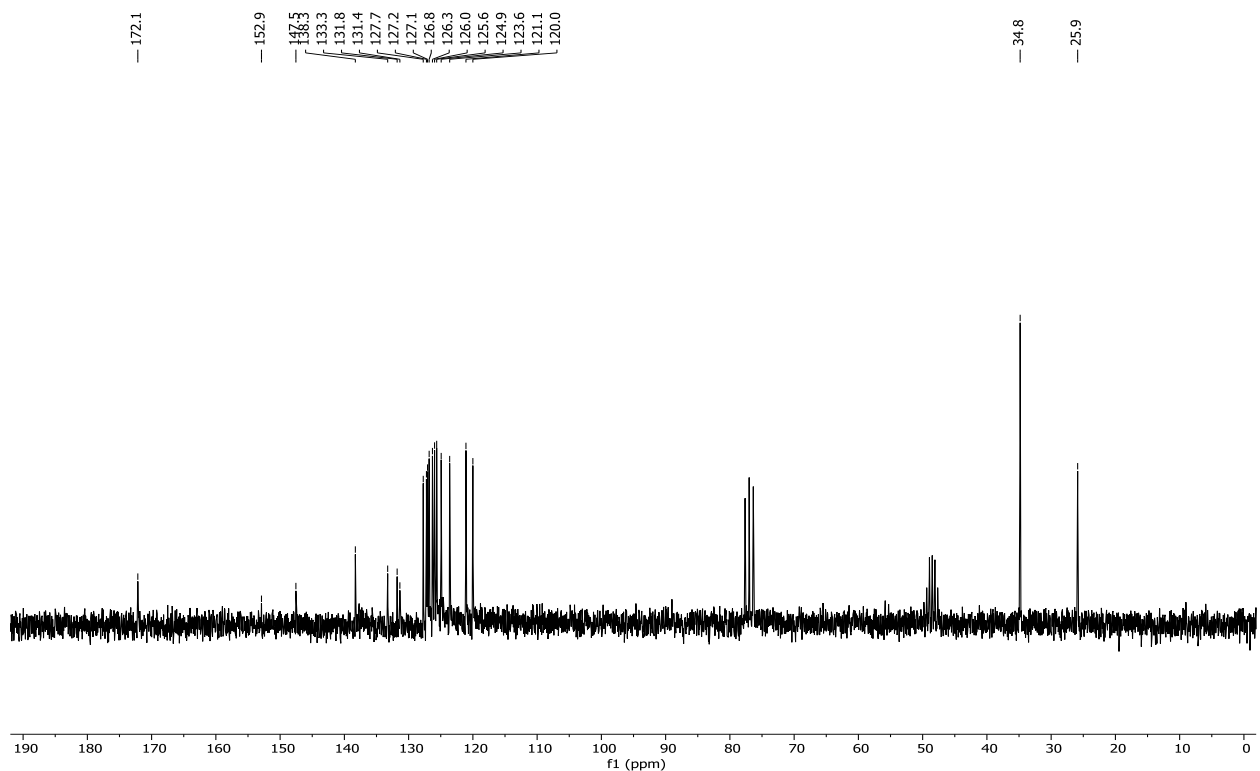

<sup>13</sup>C NMR spectrum of 5a.

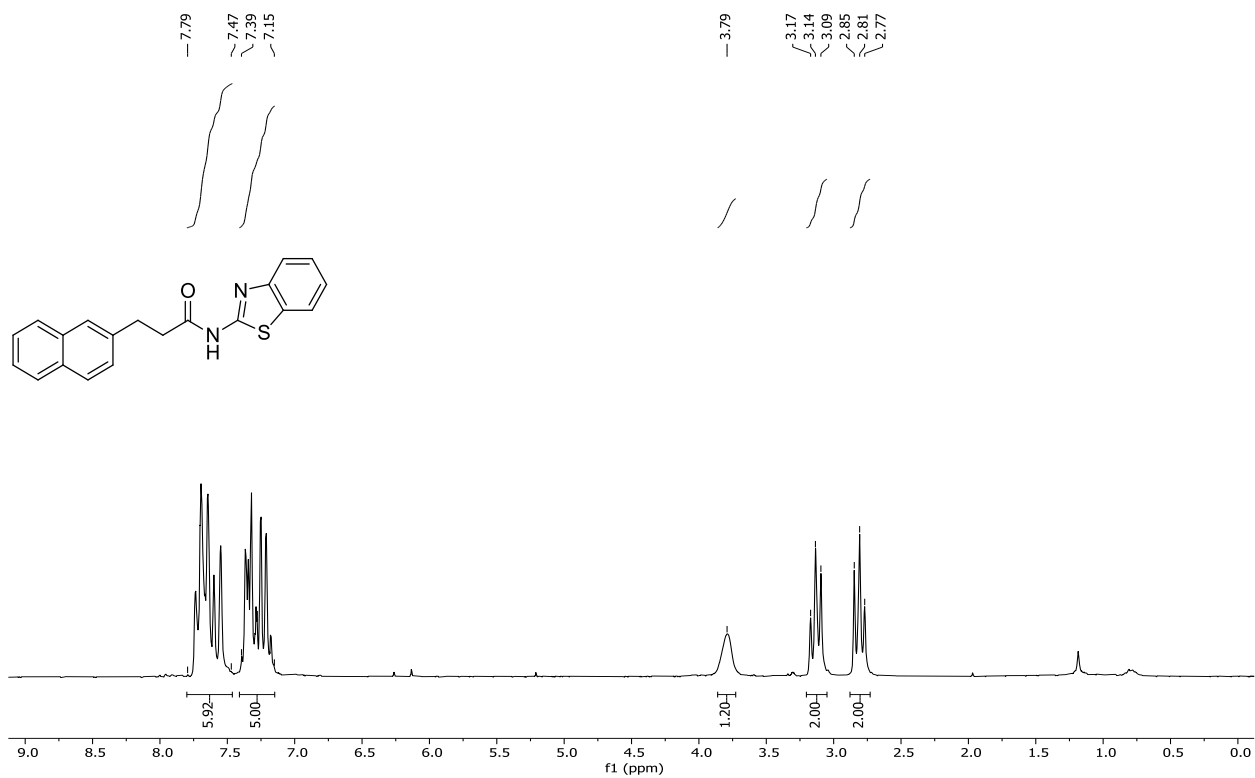

$^1\text{H}$  NMR spectrum of **5b**.

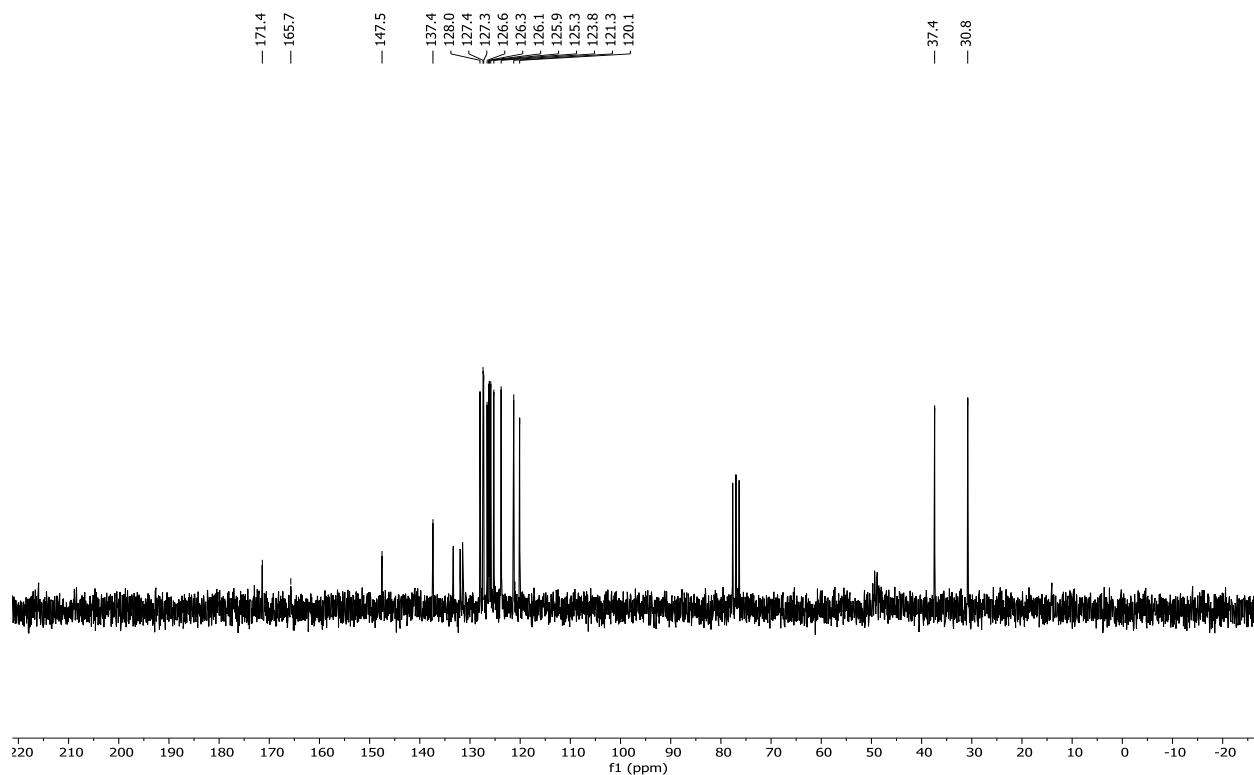

$^{13}\text{C}$  NMR spectrum of **5b**.

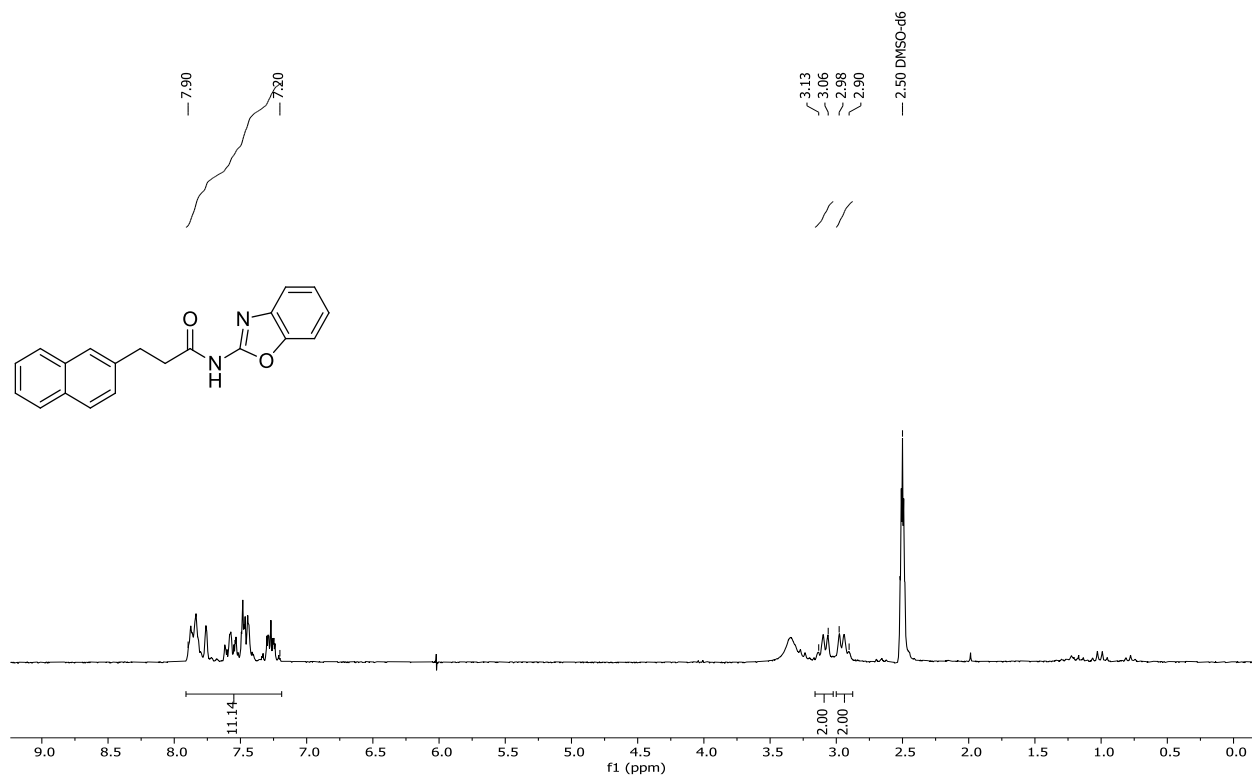

<sup>1</sup>H NMR spectrum of **5c**.

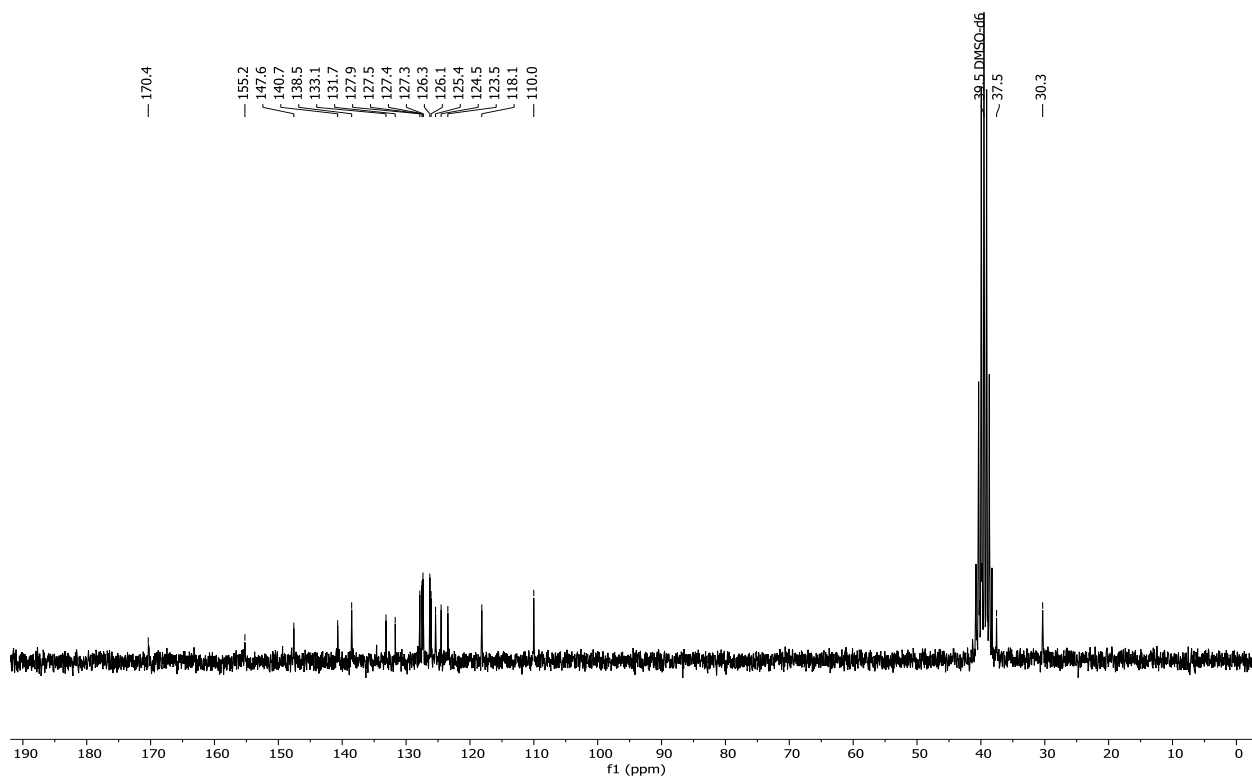

<sup>13</sup>C NMR spectrum of **5c**.



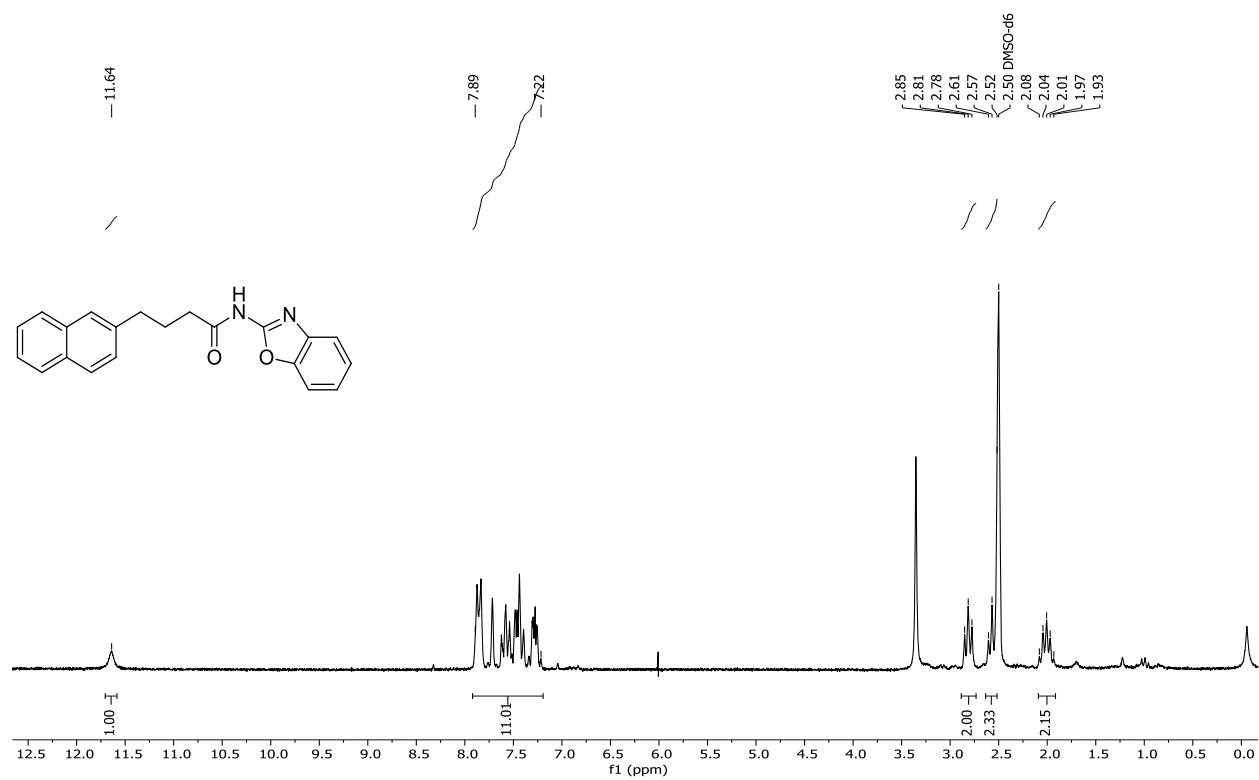

<sup>1</sup>H NMR spectrum of **5d**.

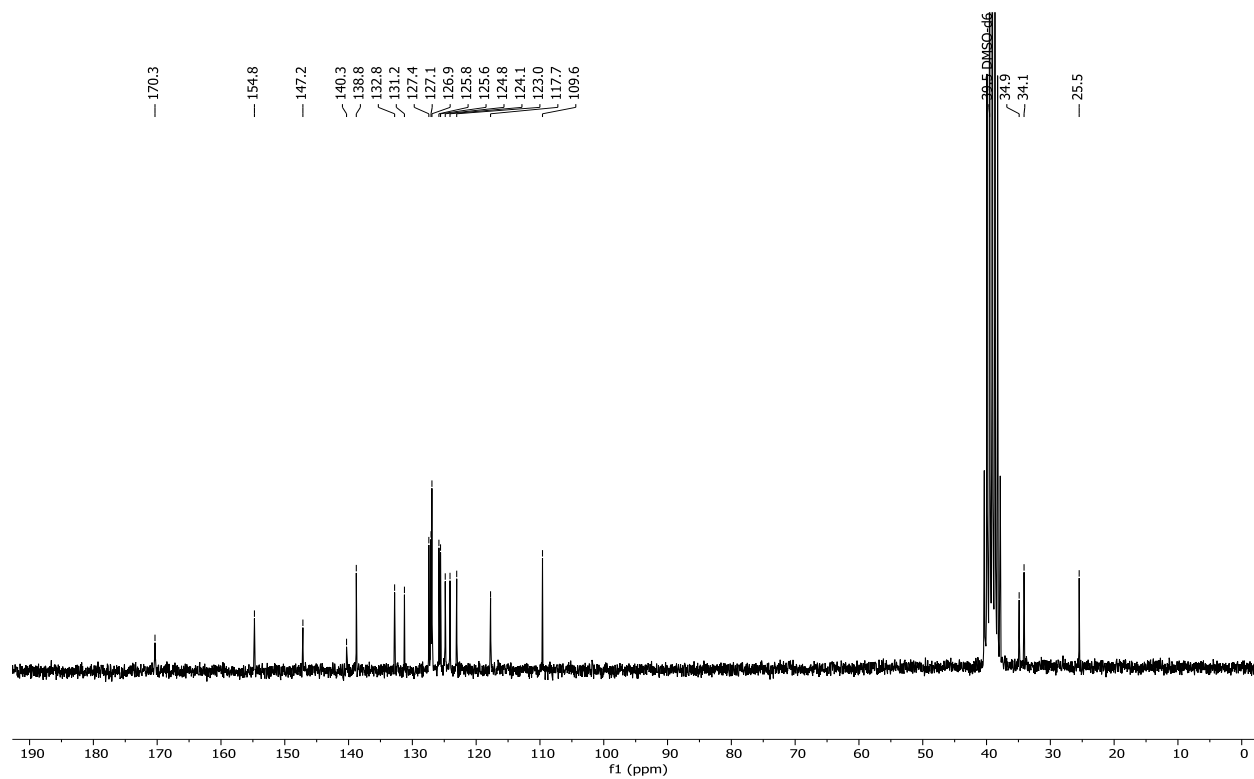

<sup>13</sup>C NMR spectrum of **5d**.

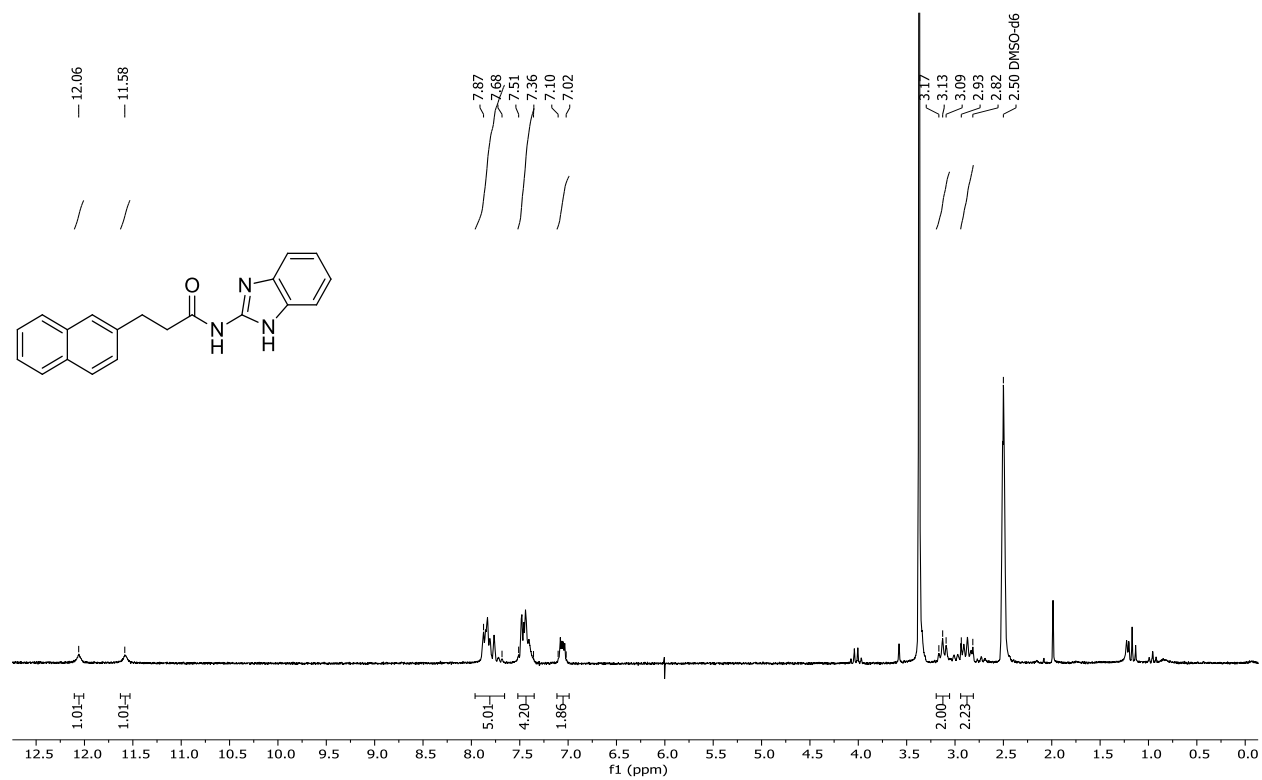

<sup>1</sup>H NMR spectrum of **5e**.

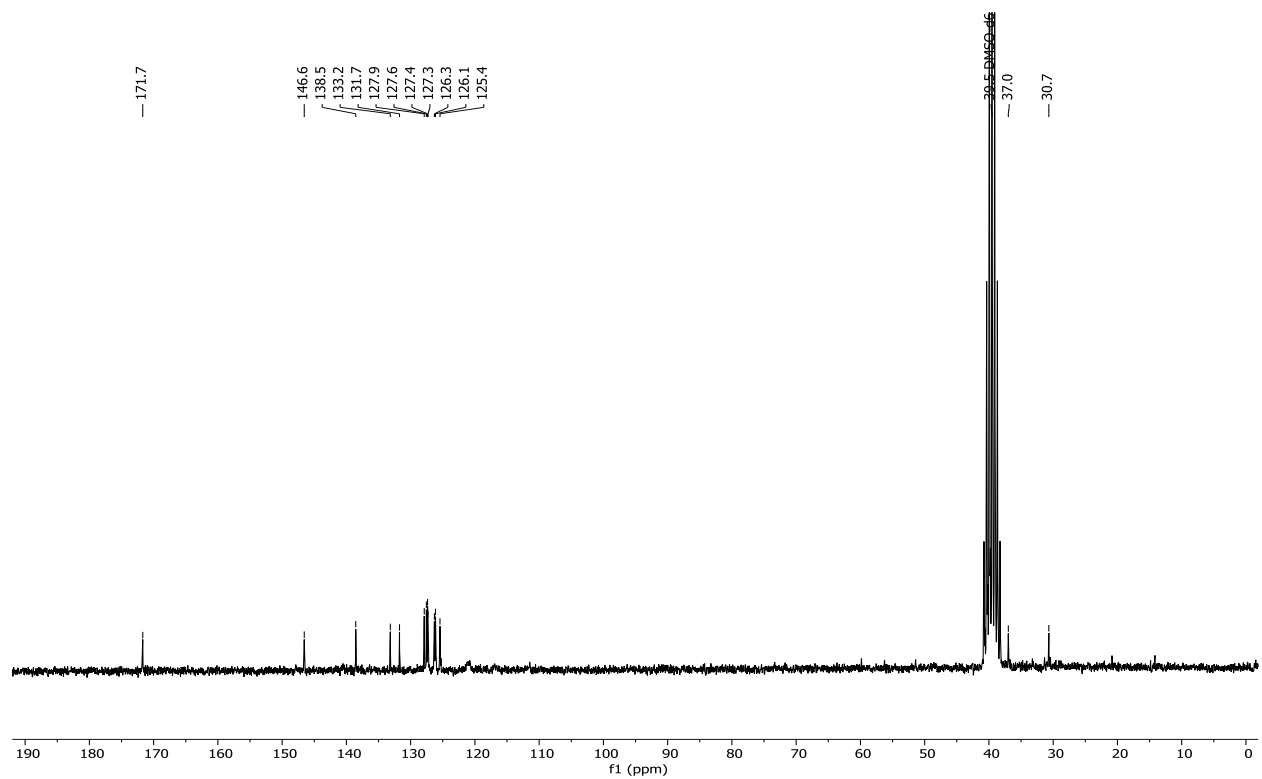

<sup>13</sup>C NMR spectrum of **5e**.

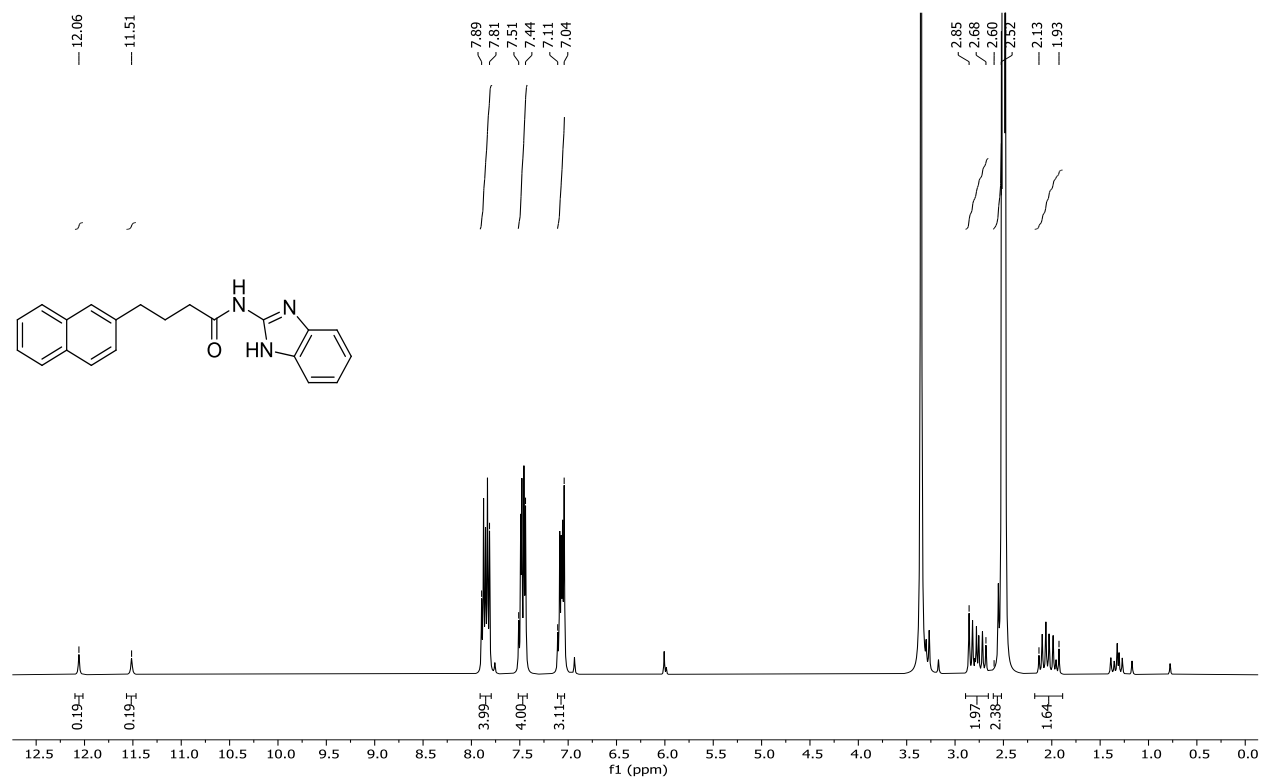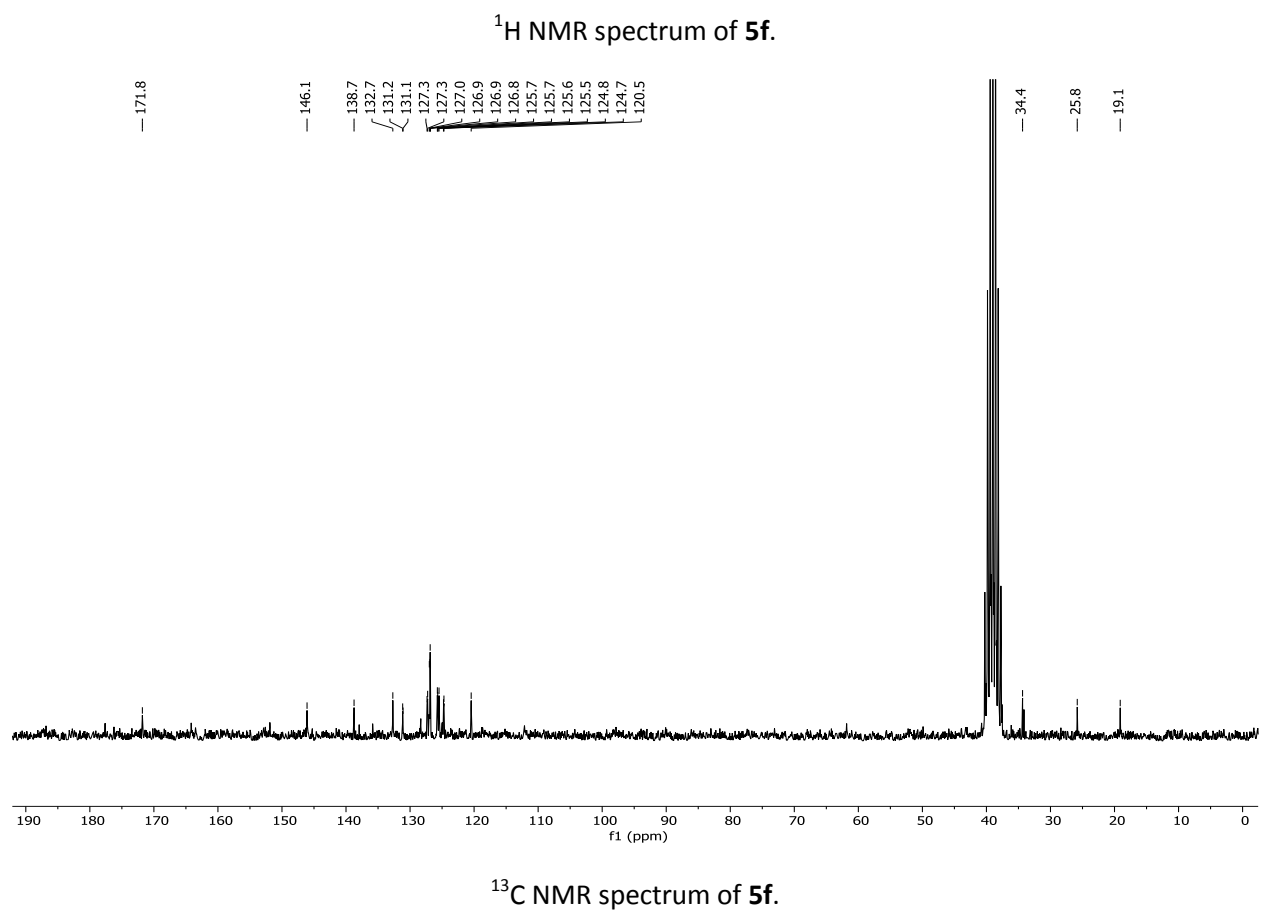

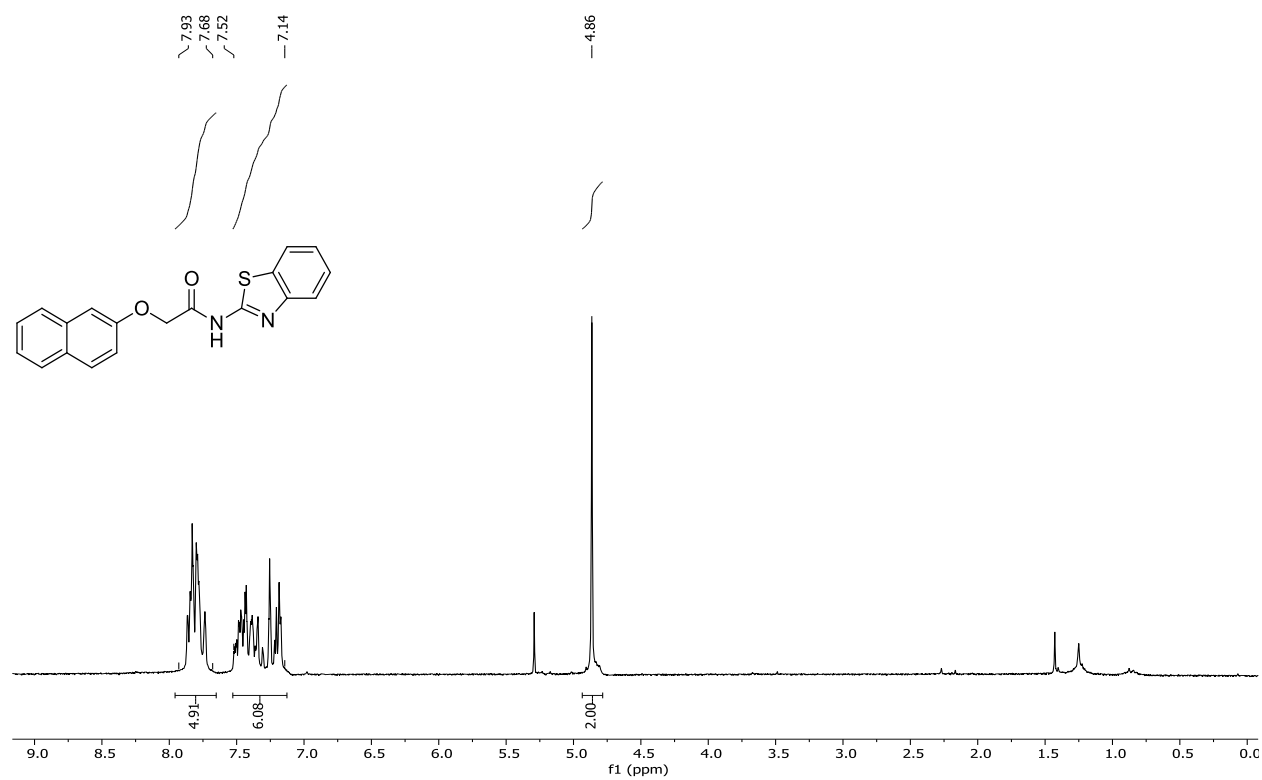

<sup>1</sup>H NMR spectrum of 7.

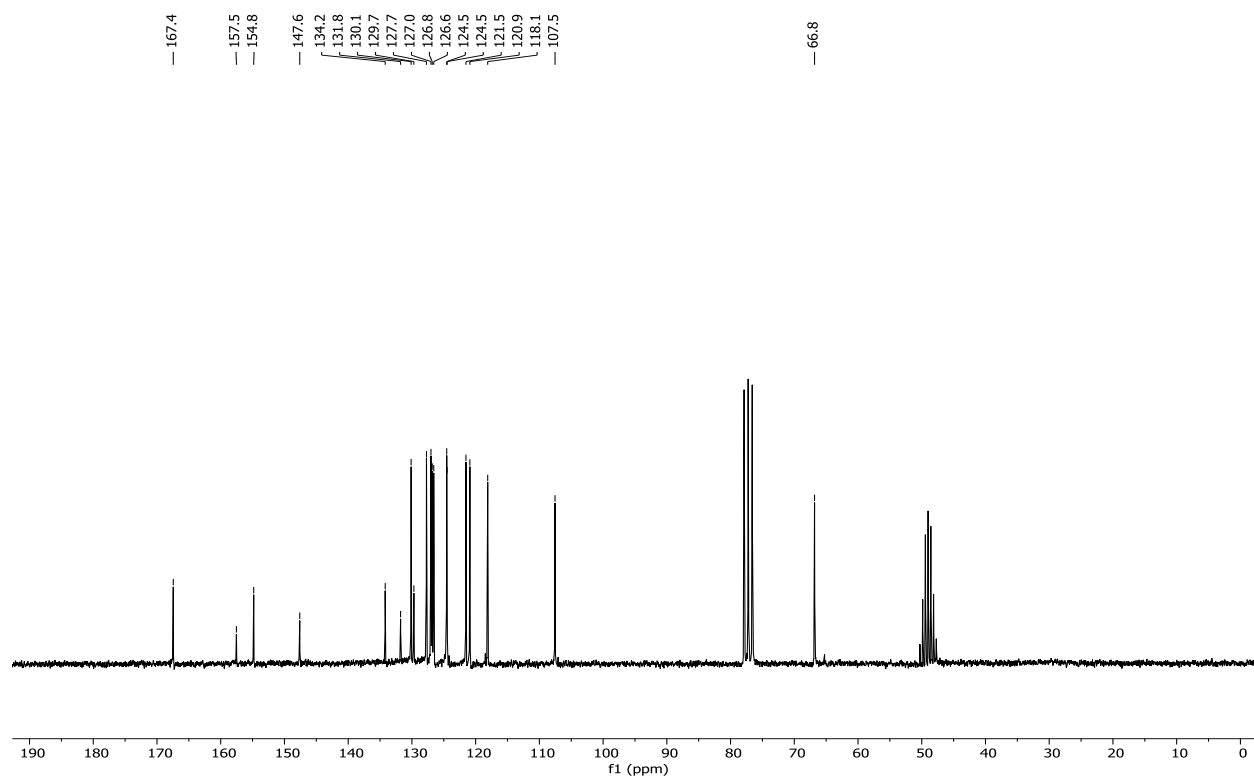

<sup>13</sup>C NMR spectrum of 7.

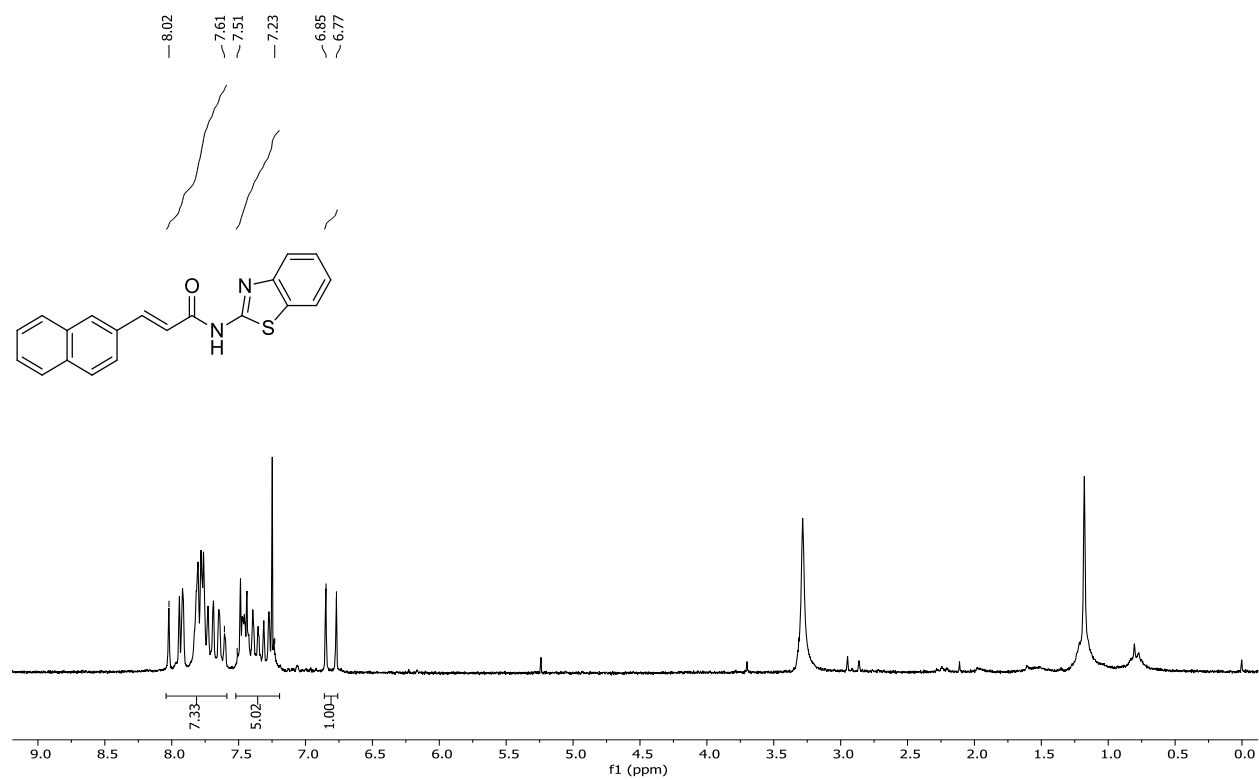

$^1\text{H}$  NMR spectrum of **9a**.

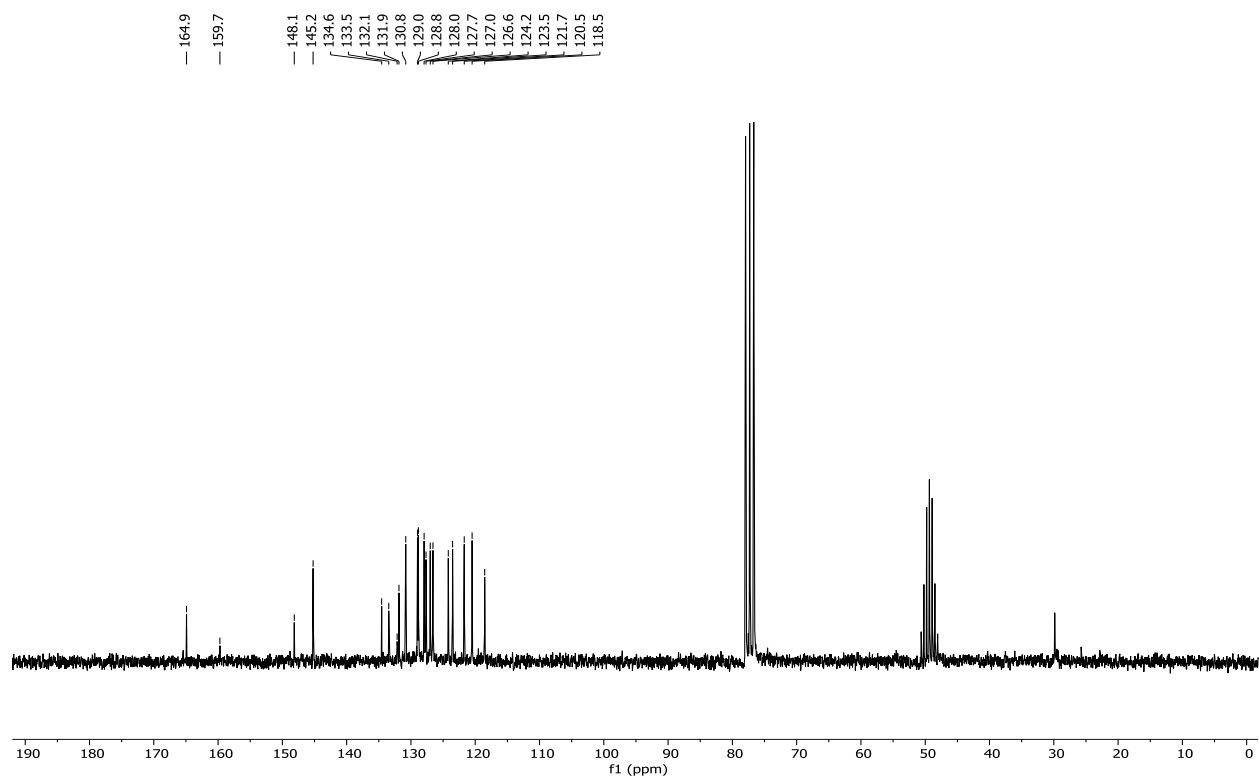

$^{13}\text{C}$  NMR spectrum of **9a**.

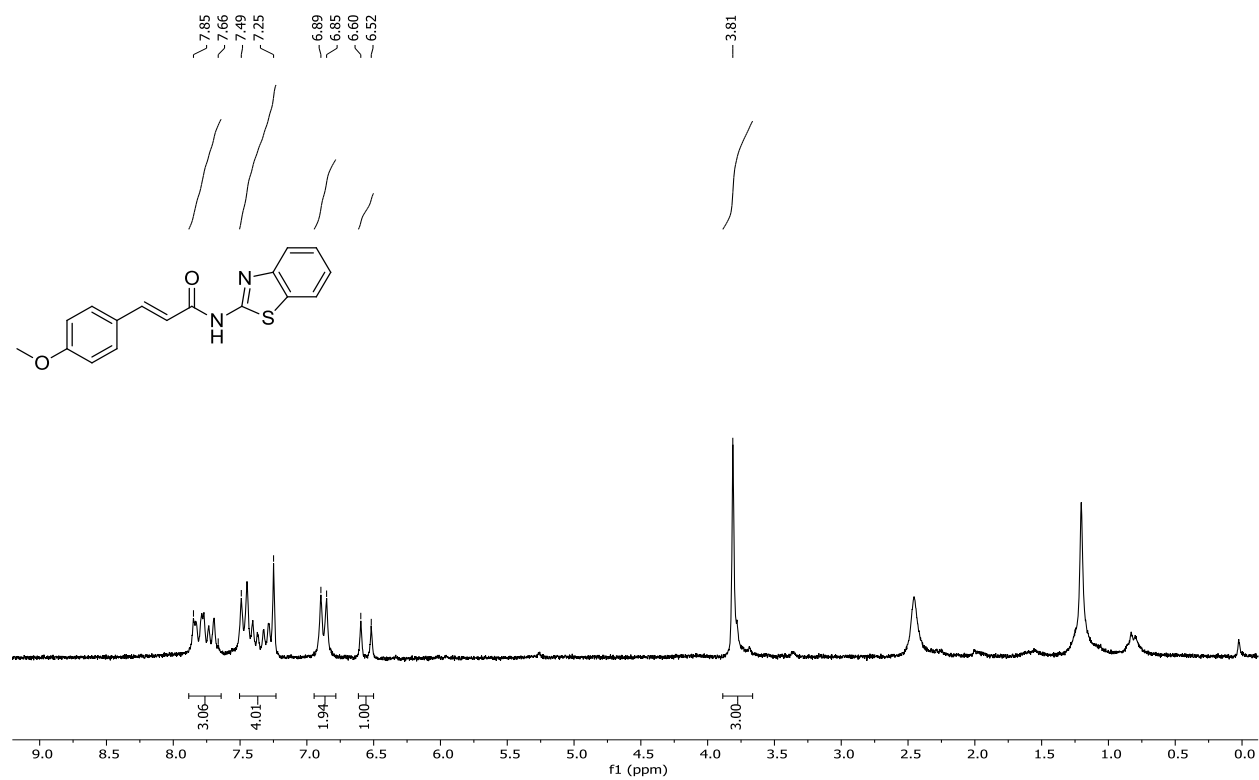

<sup>1</sup>H NMR spectrum of **9b**.

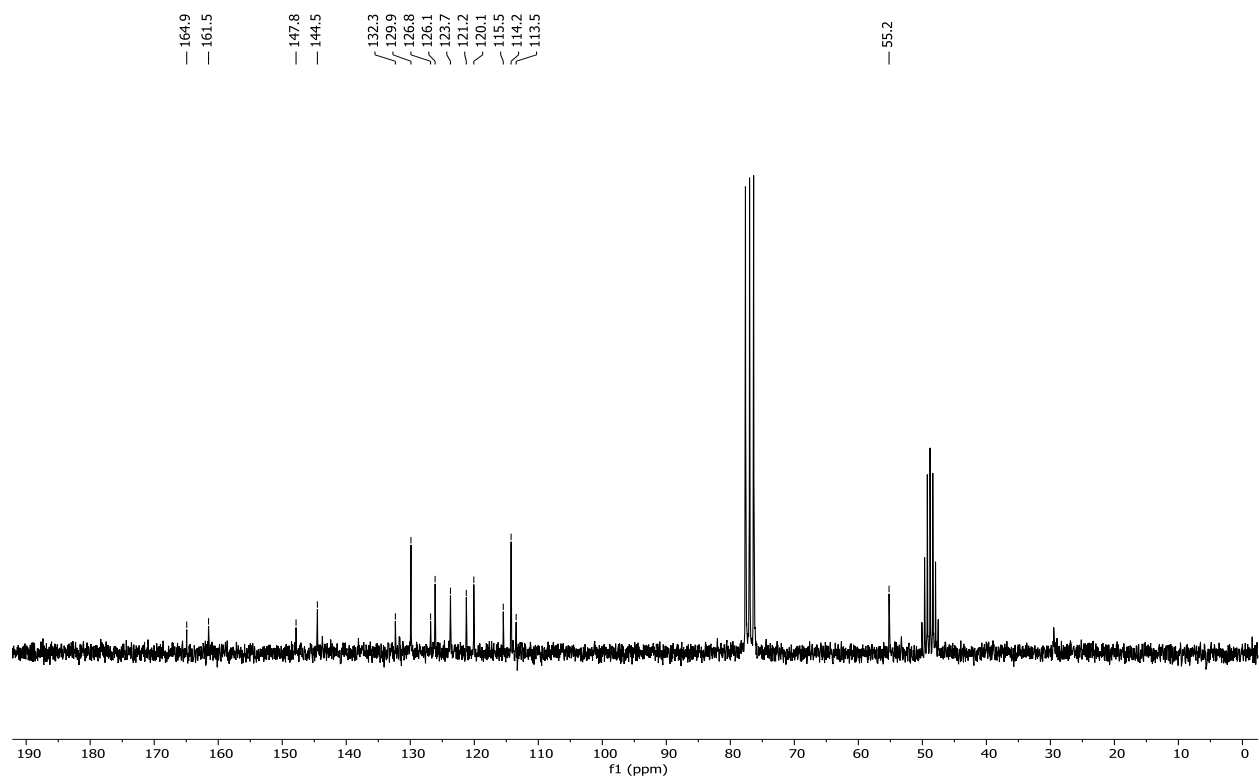

<sup>13</sup>C NMR spectrum of **9b**.

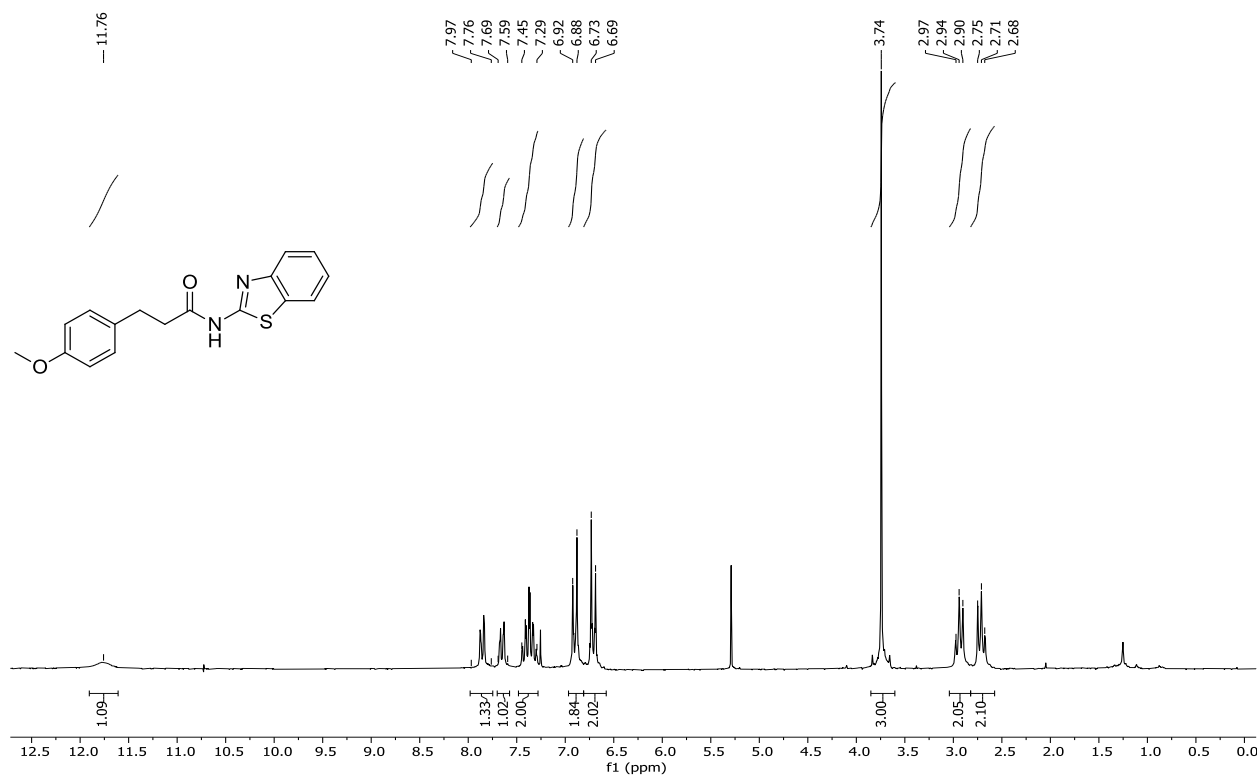

<sup>1</sup>H NMR spectrum of **11**.

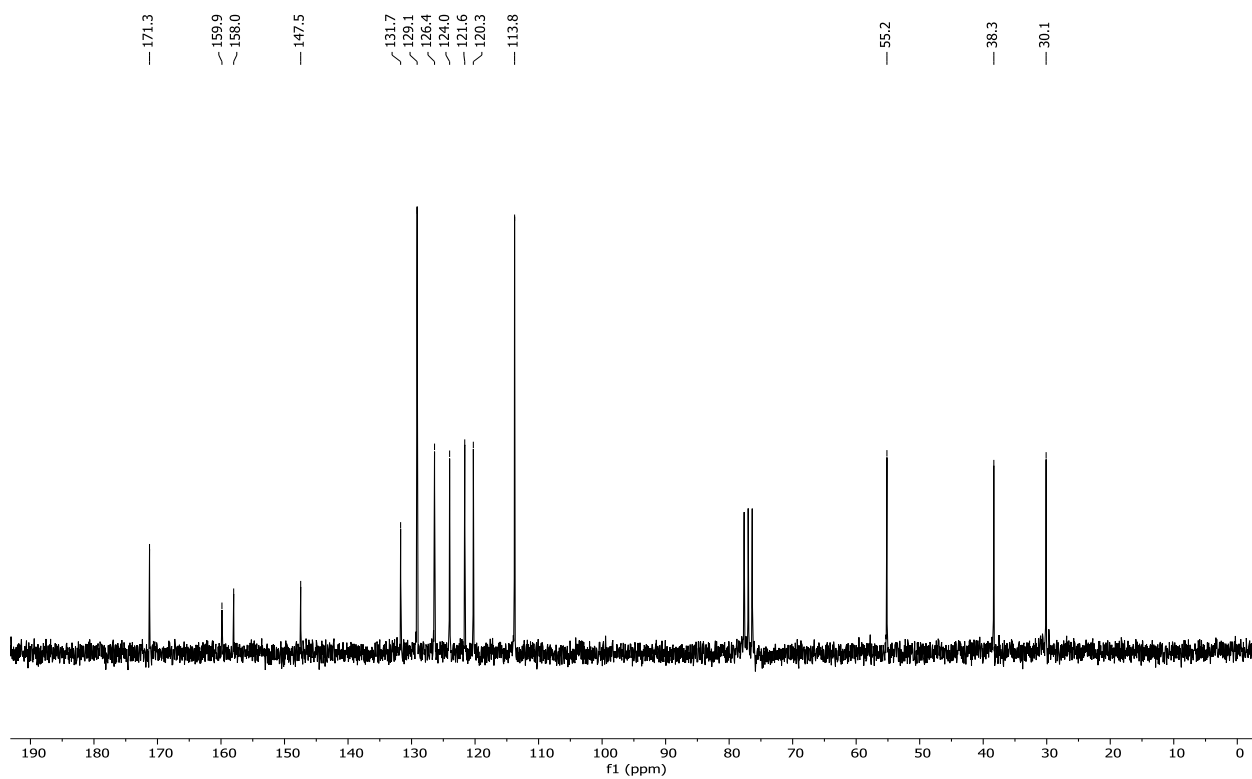

<sup>13</sup>C NMR spectrum of **11**.

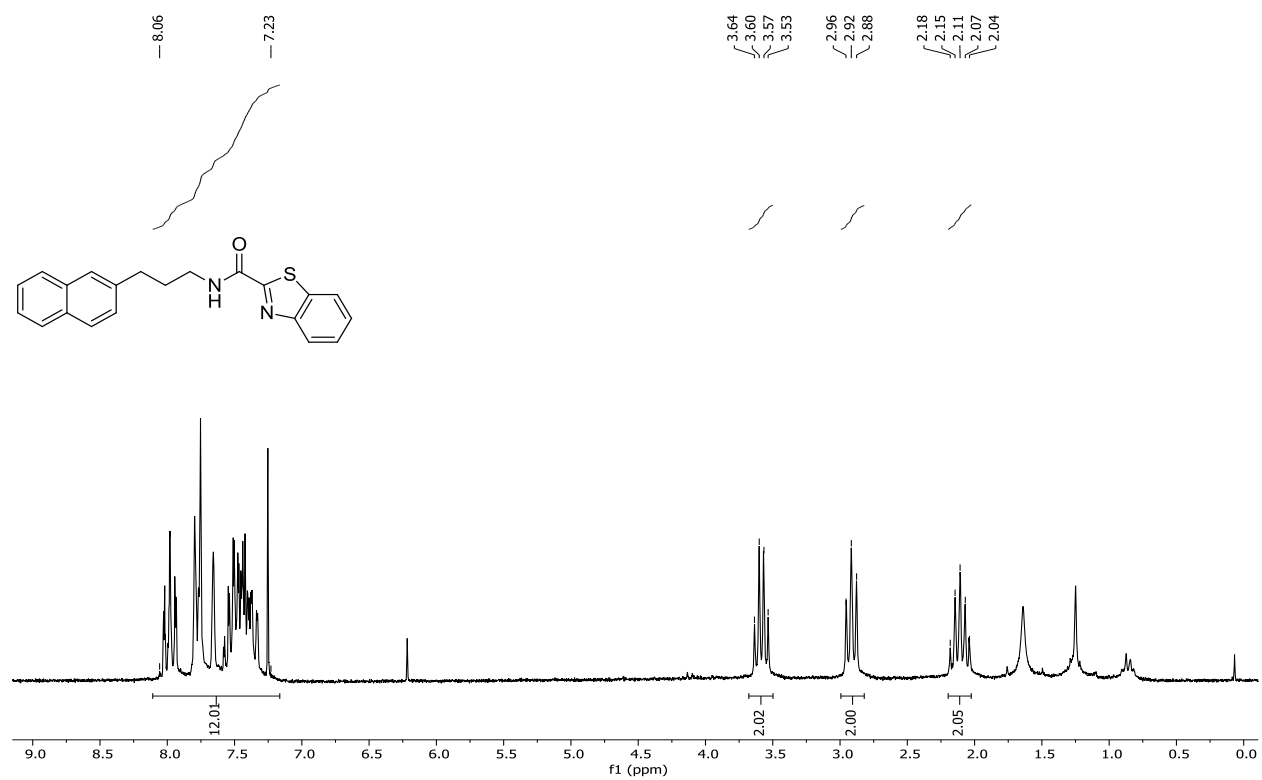

<sup>1</sup>H NMR spectrum of **14**.

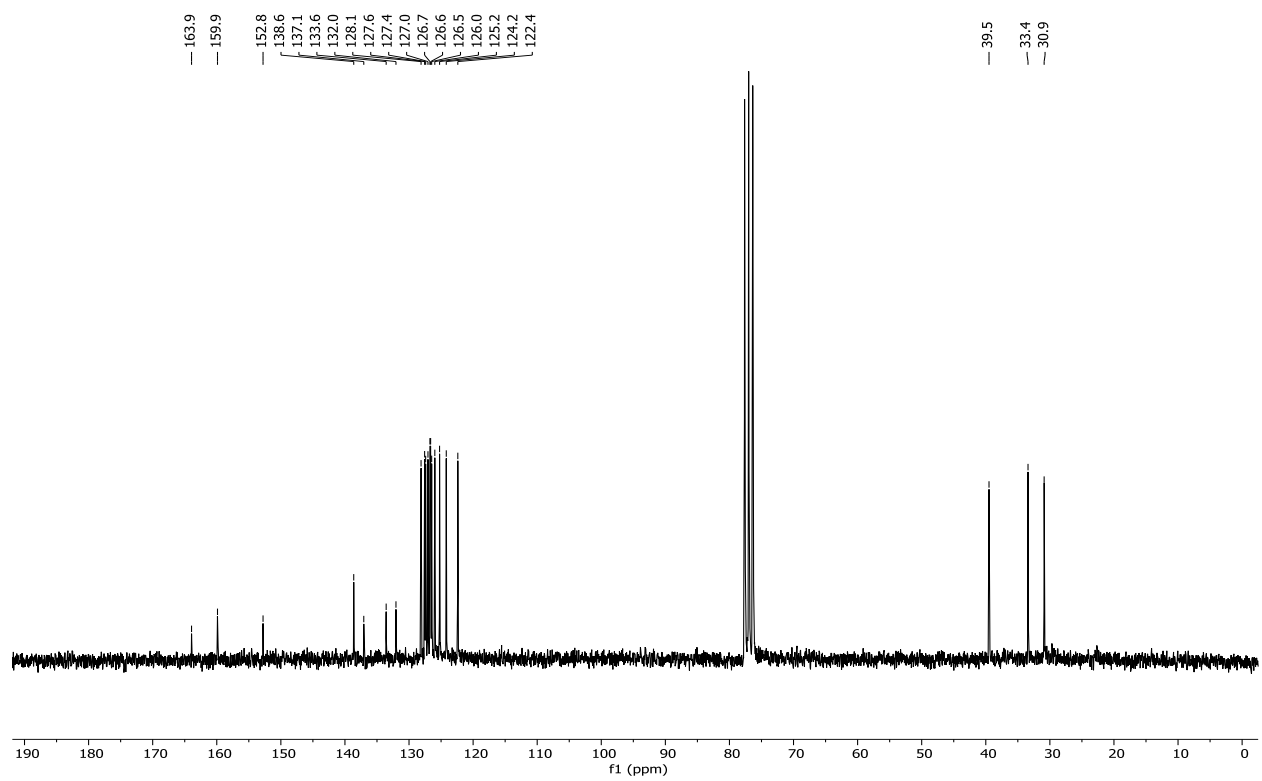

<sup>13</sup>C NMR spectrum of **14**.



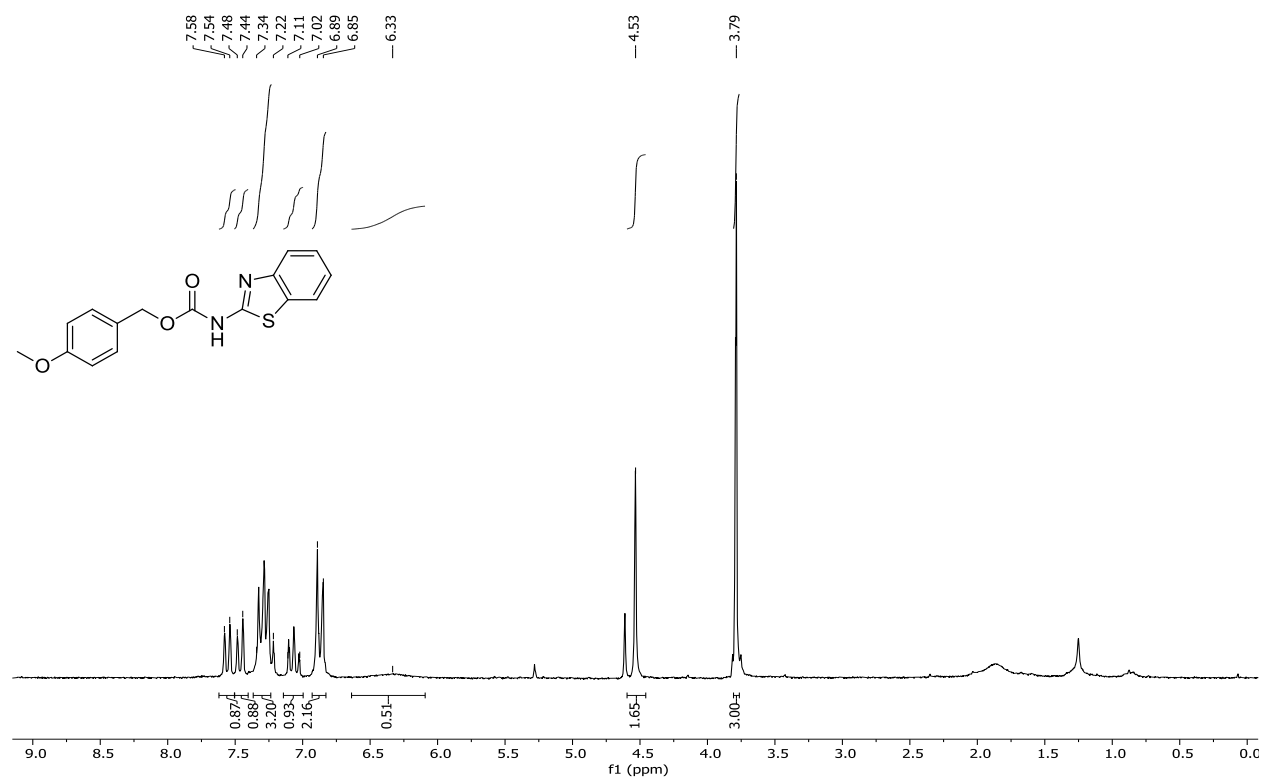

<sup>1</sup>H NMR spectrum of 16a.

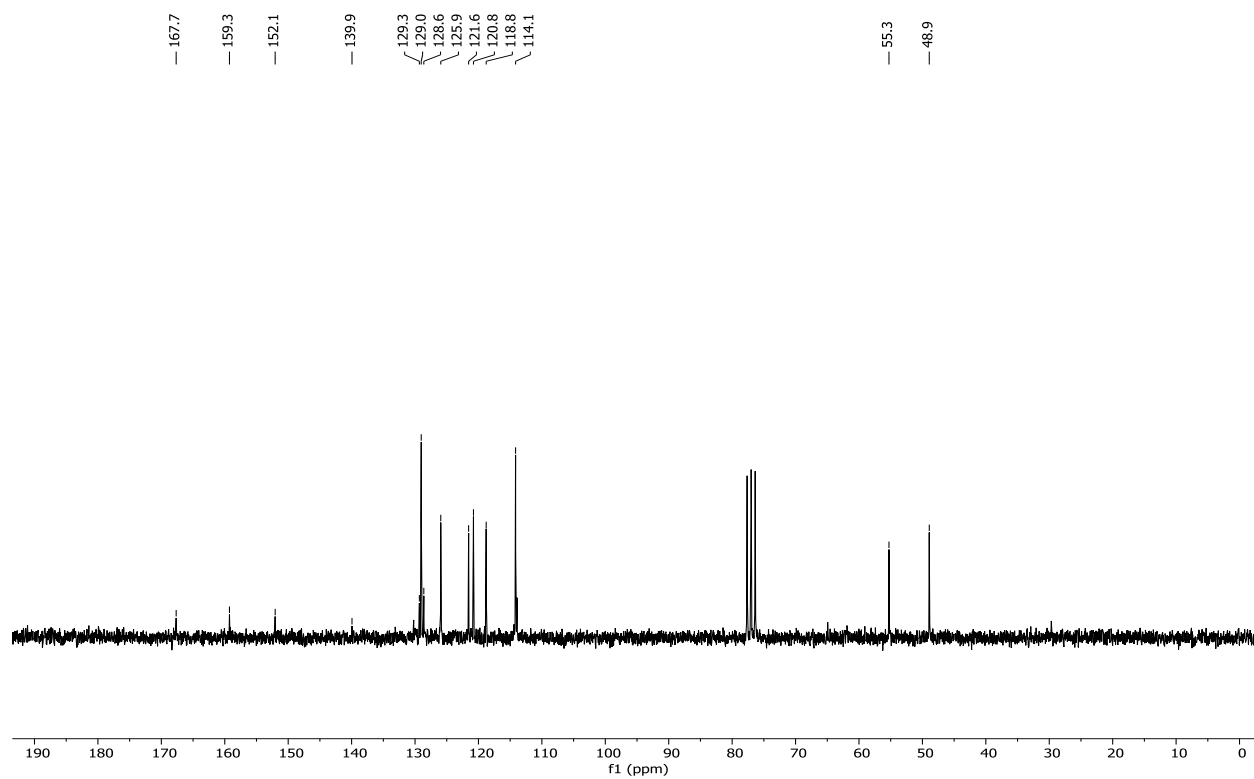

<sup>13</sup>C NMR spectrum of 16a.

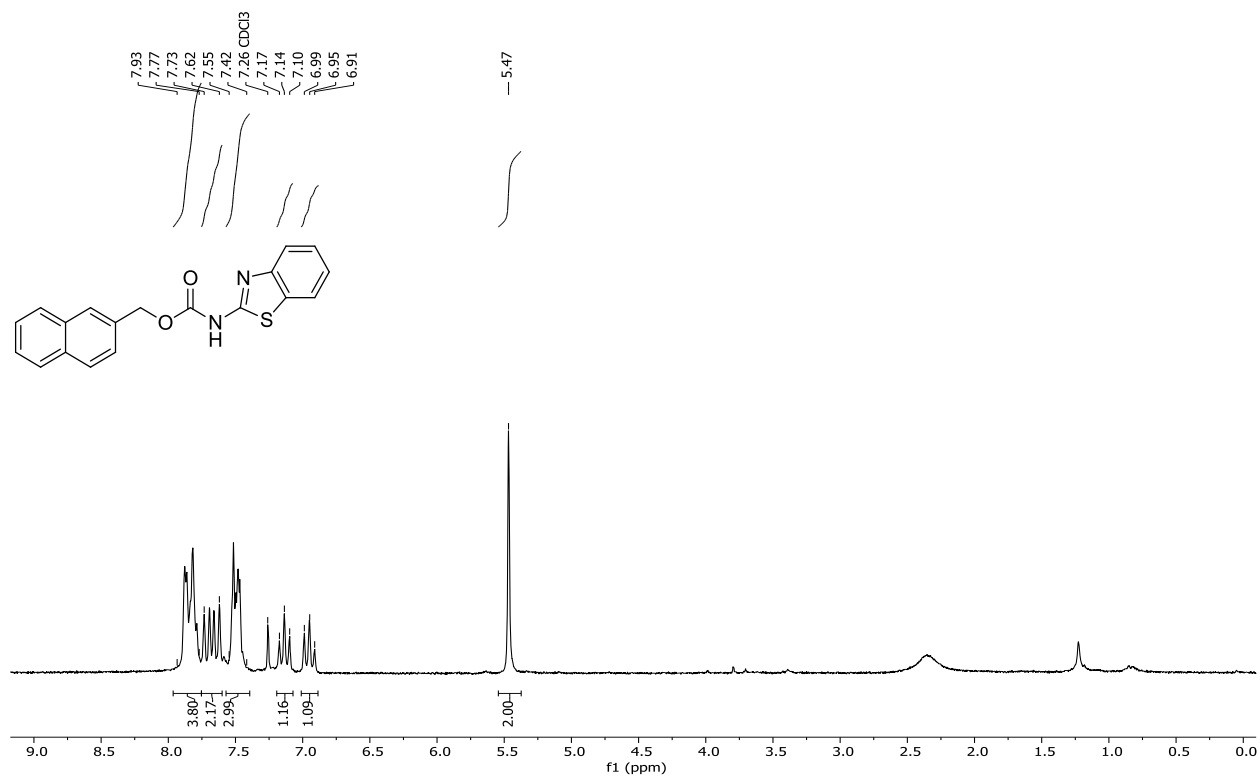

<sup>1</sup>H NMR spectrum of **16b**.

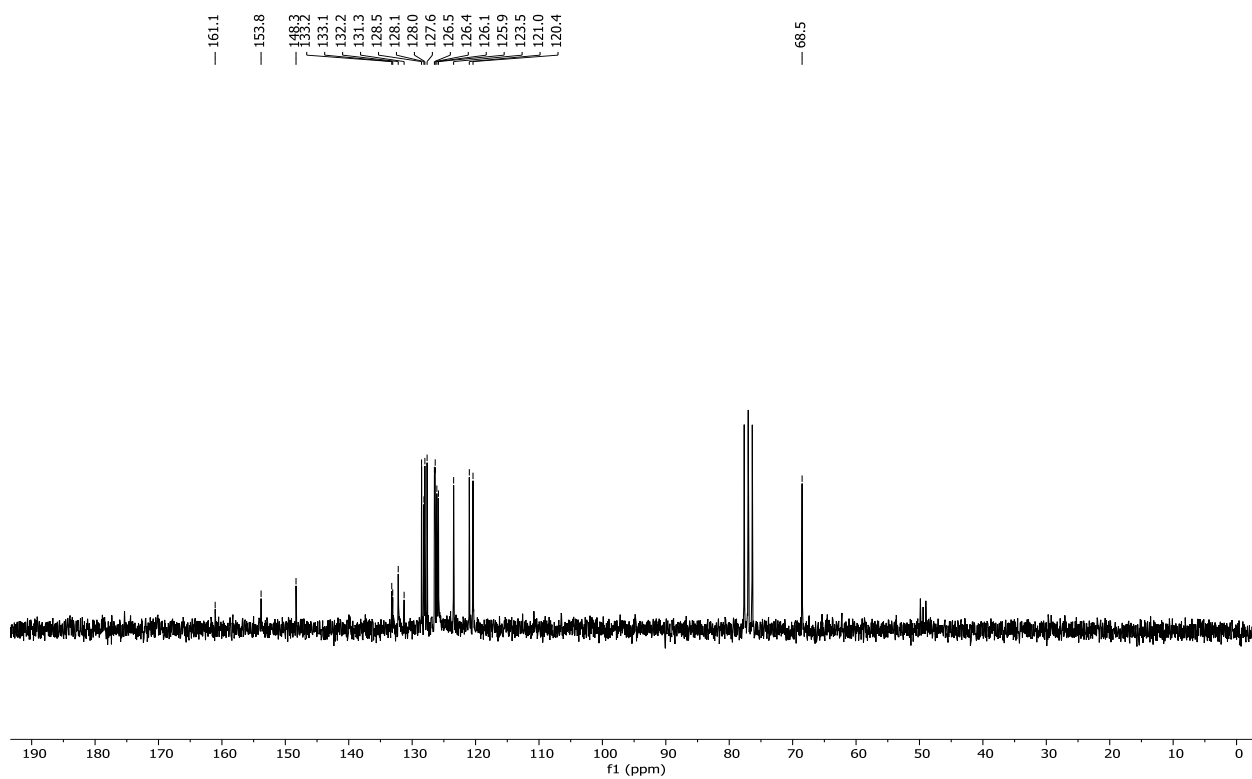

<sup>13</sup>C NMR spectrum of **16b**.

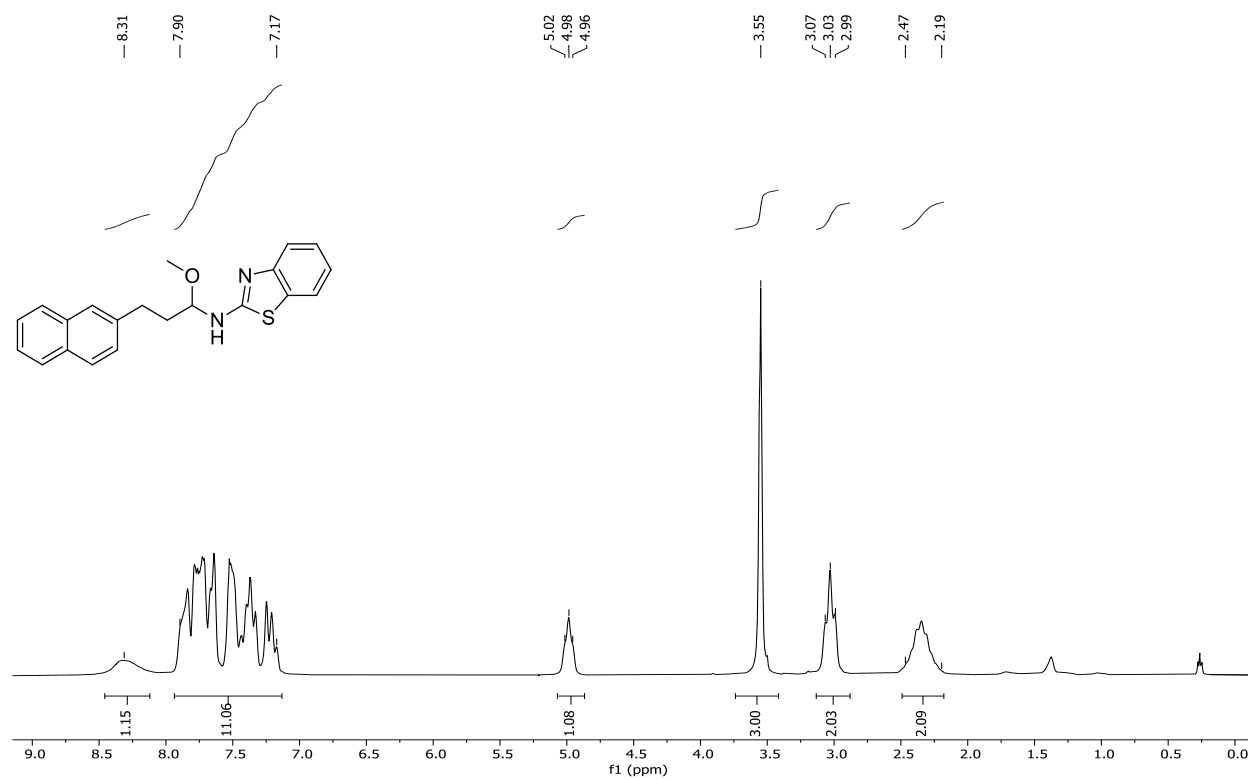

<sup>1</sup>H NMR spectrum of **18a**.

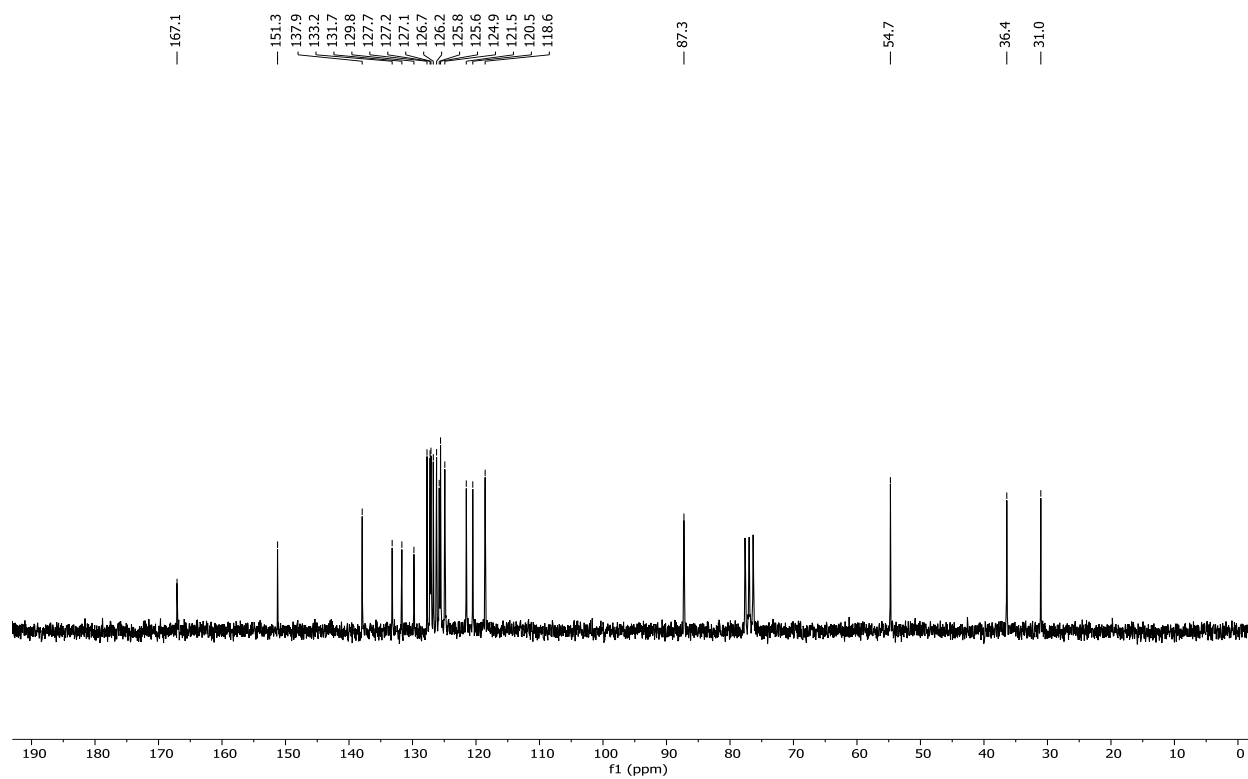

<sup>13</sup>C NMR spectrum of **18a**.

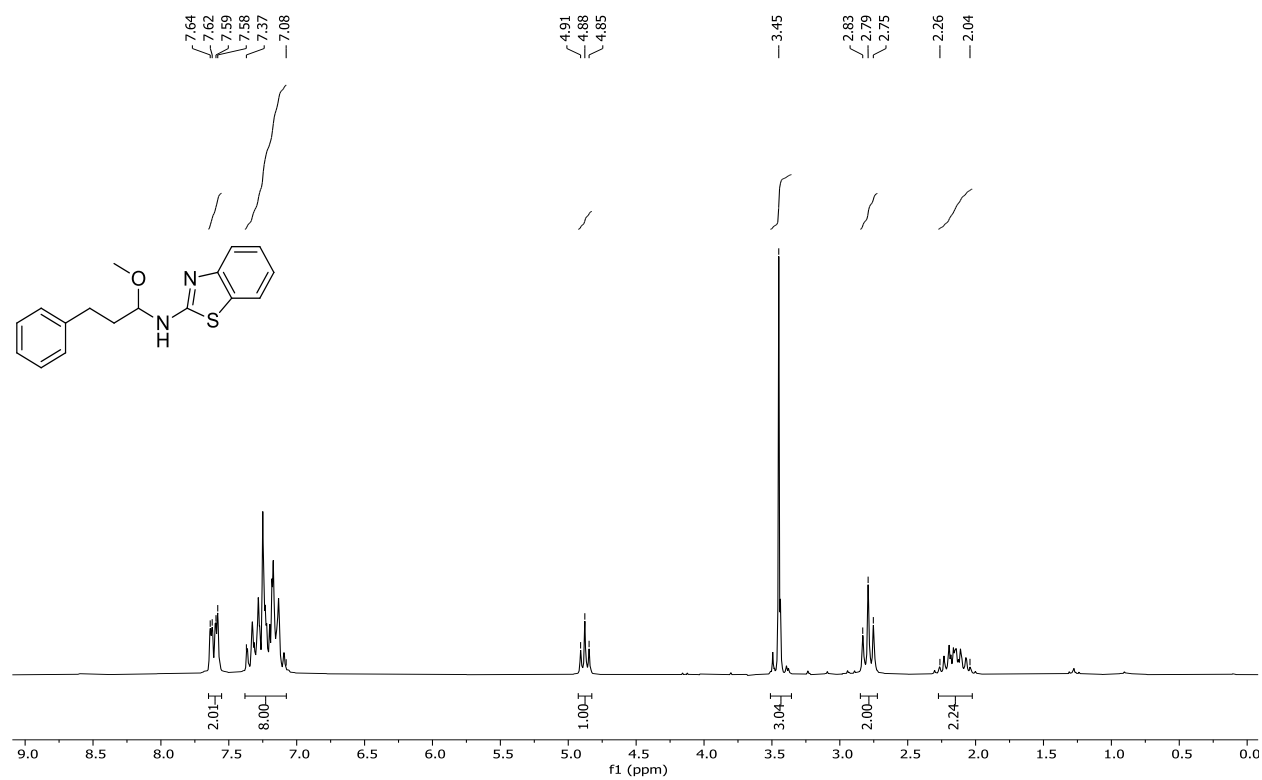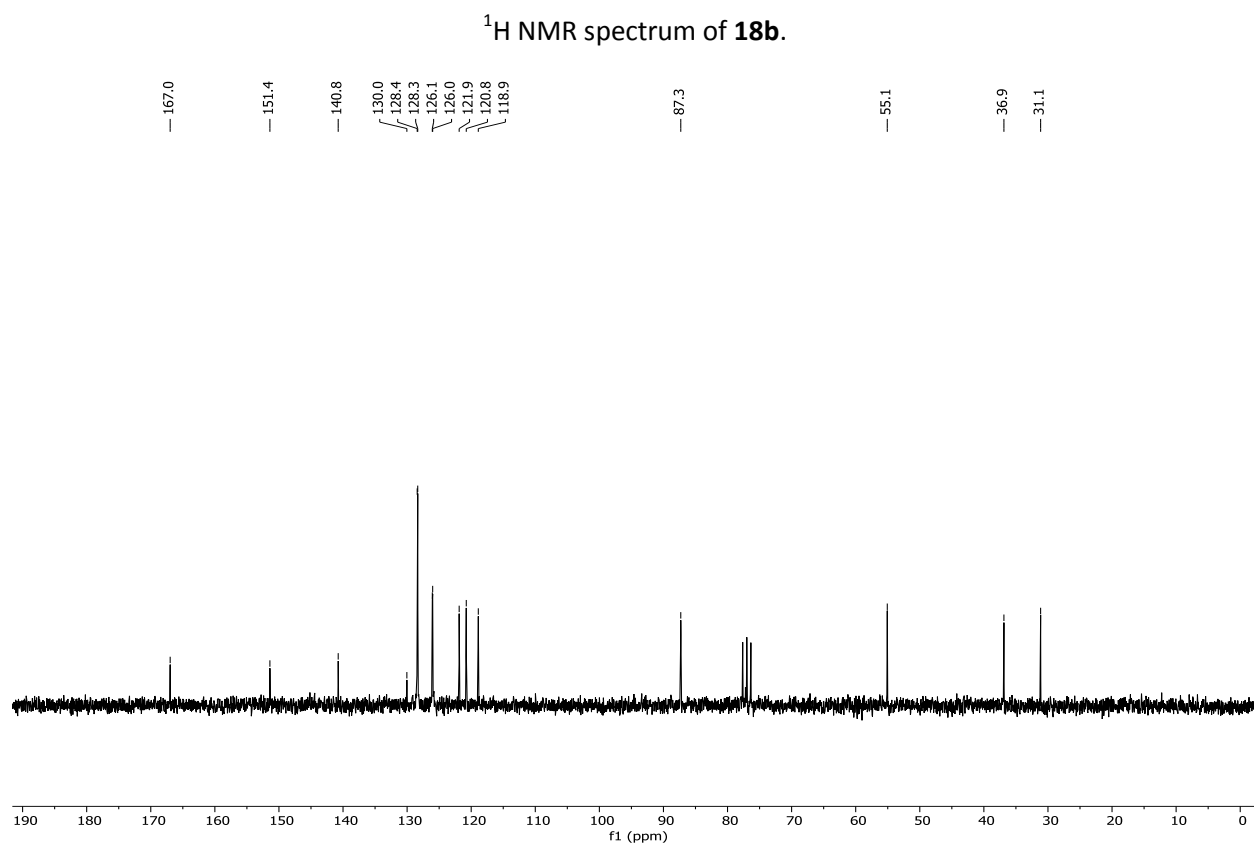

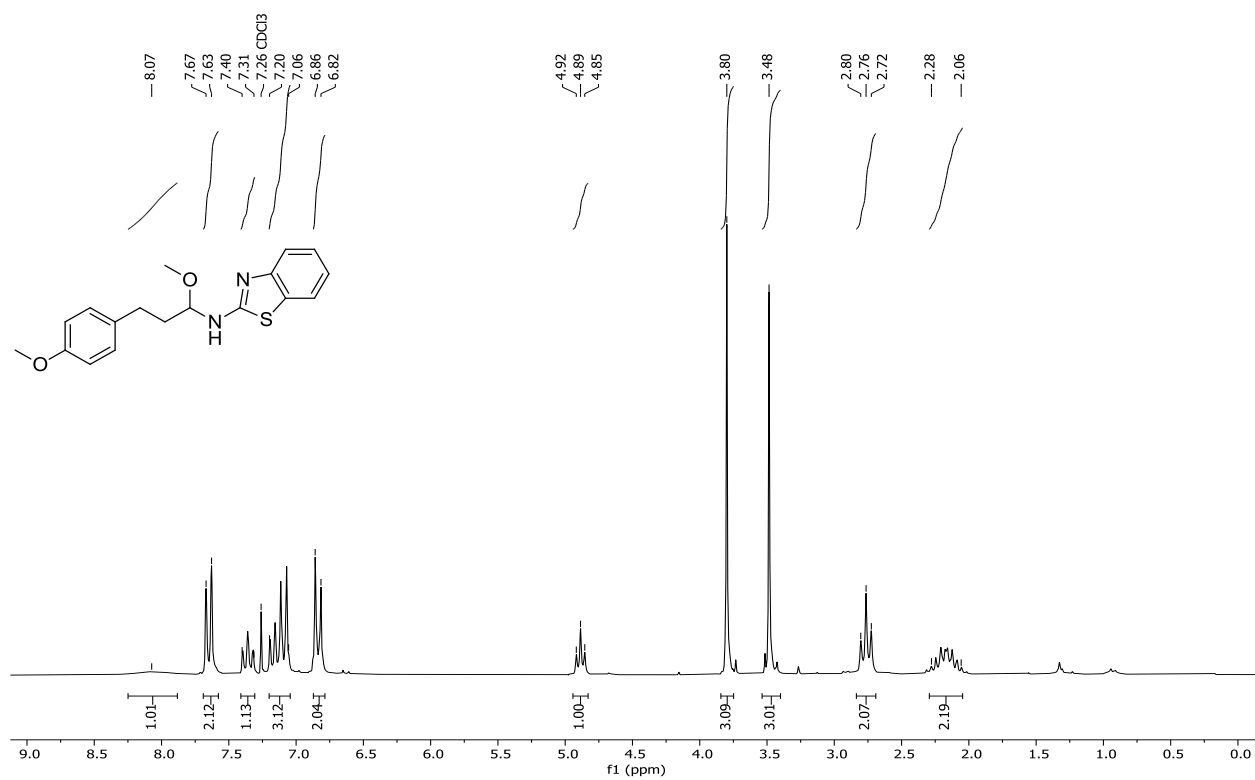

<sup>1</sup>H NMR spectrum of **18c**.

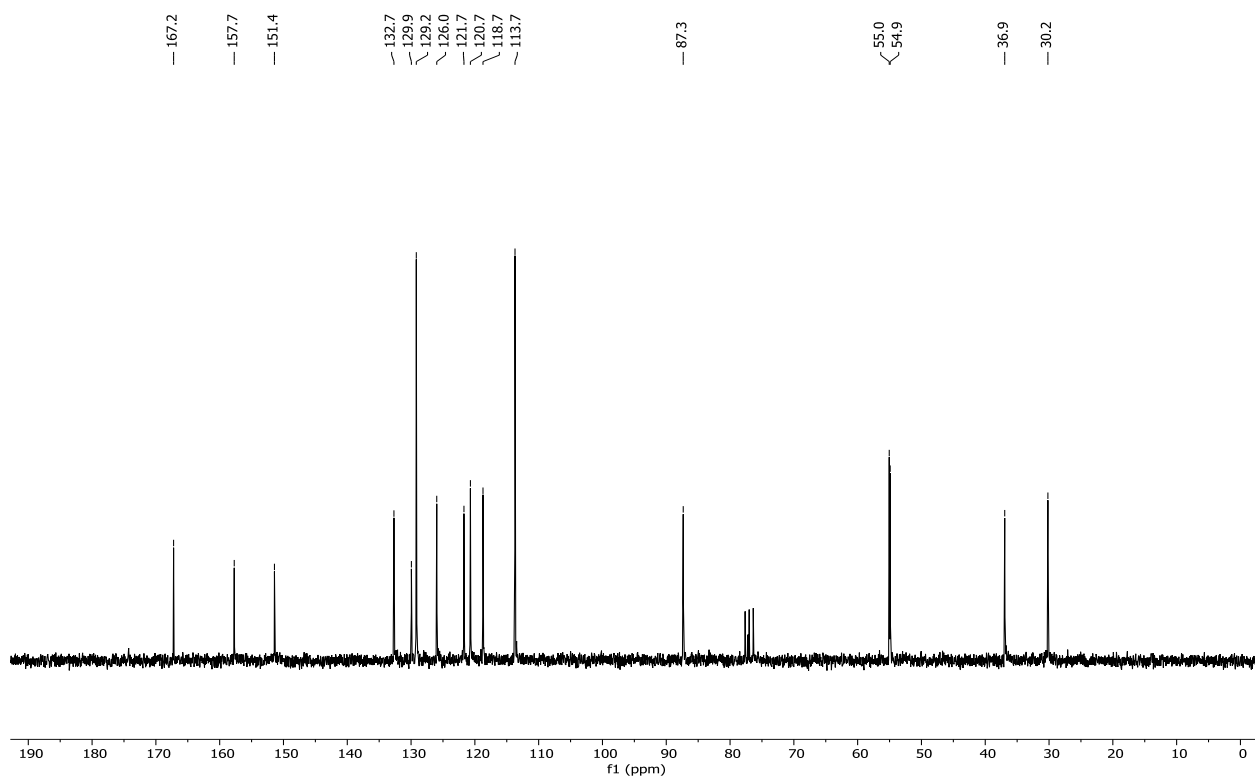

<sup>13</sup>C NMR spectrum of **18c**.

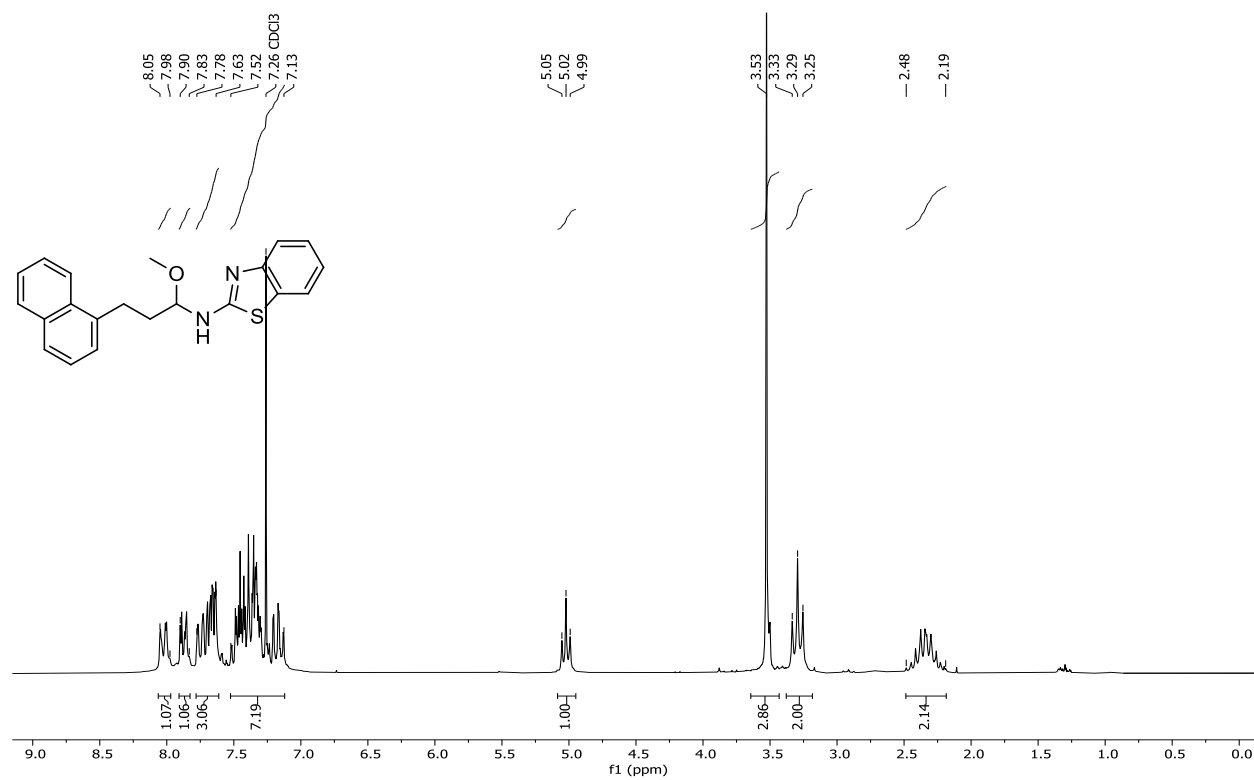

<sup>1</sup>H NMR spectrum of **18d**.

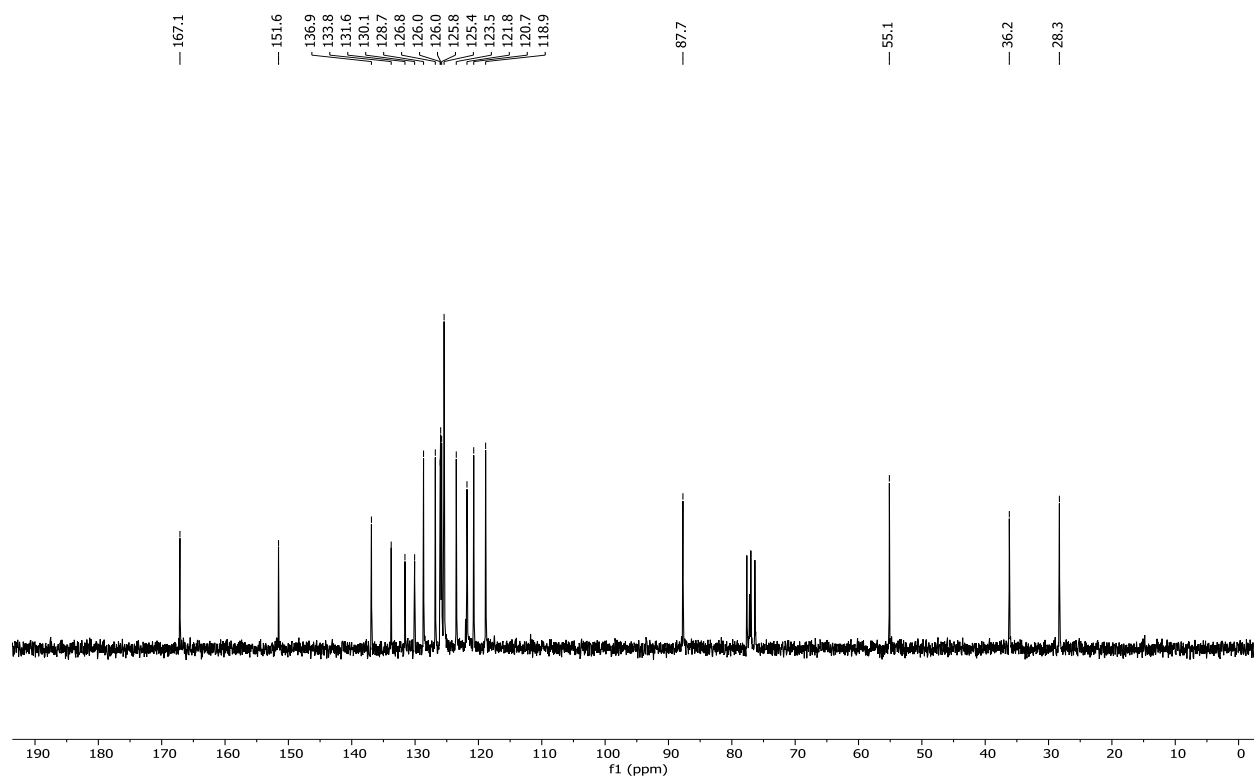

<sup>13</sup>C NMR spectrum of **18d**.

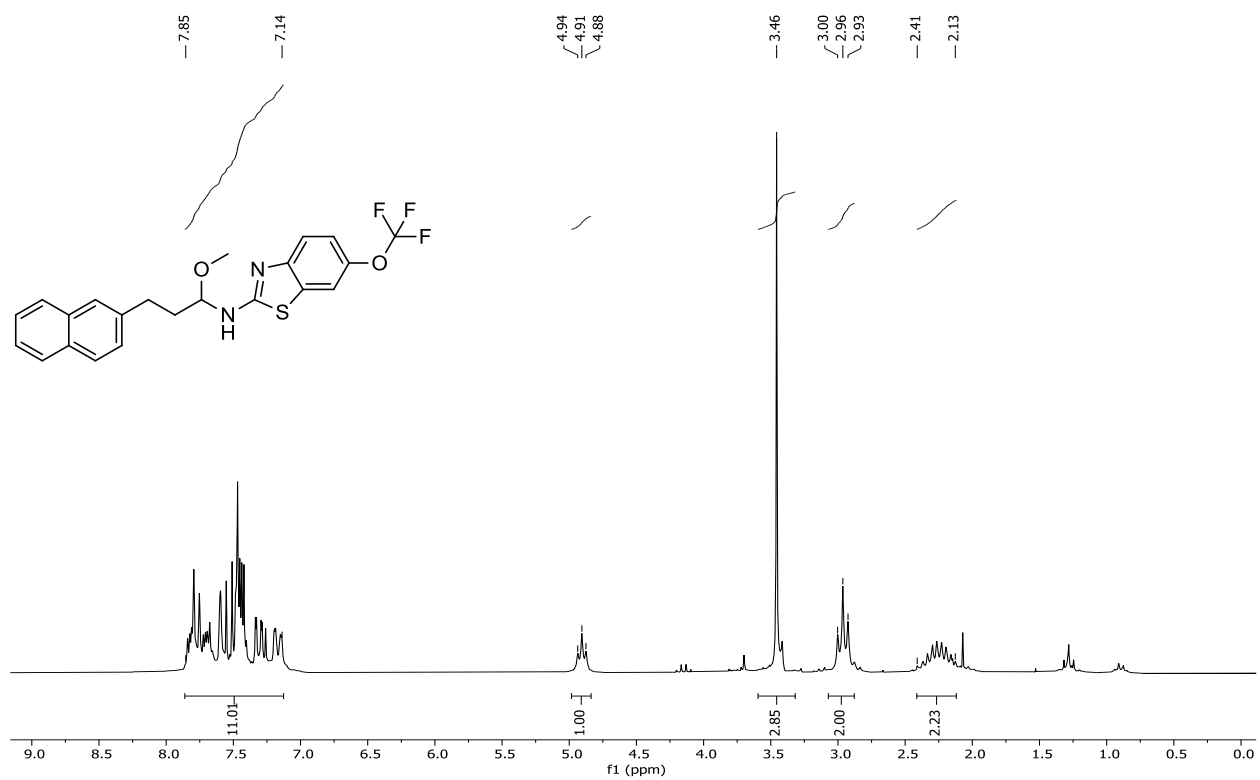

<sup>1</sup>H NMR spectrum of **18g**.

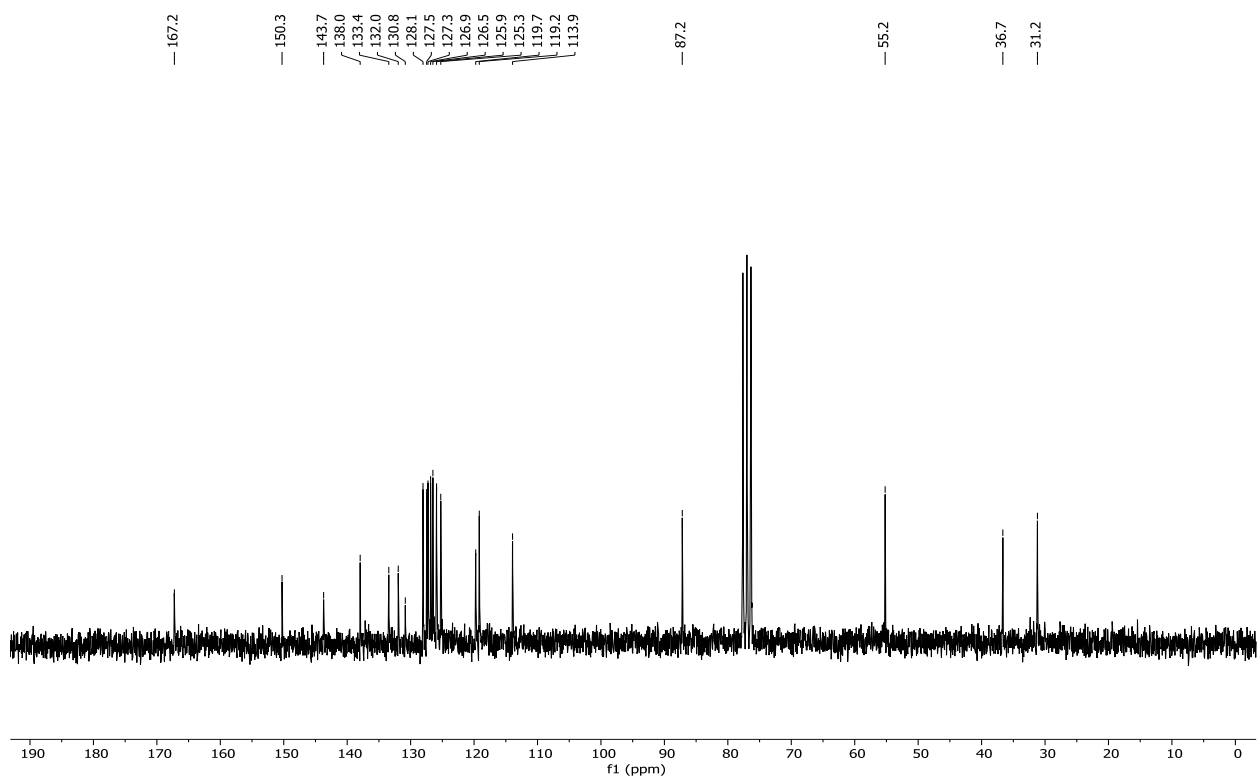

<sup>13</sup>C NMR spectrum of **18g**.

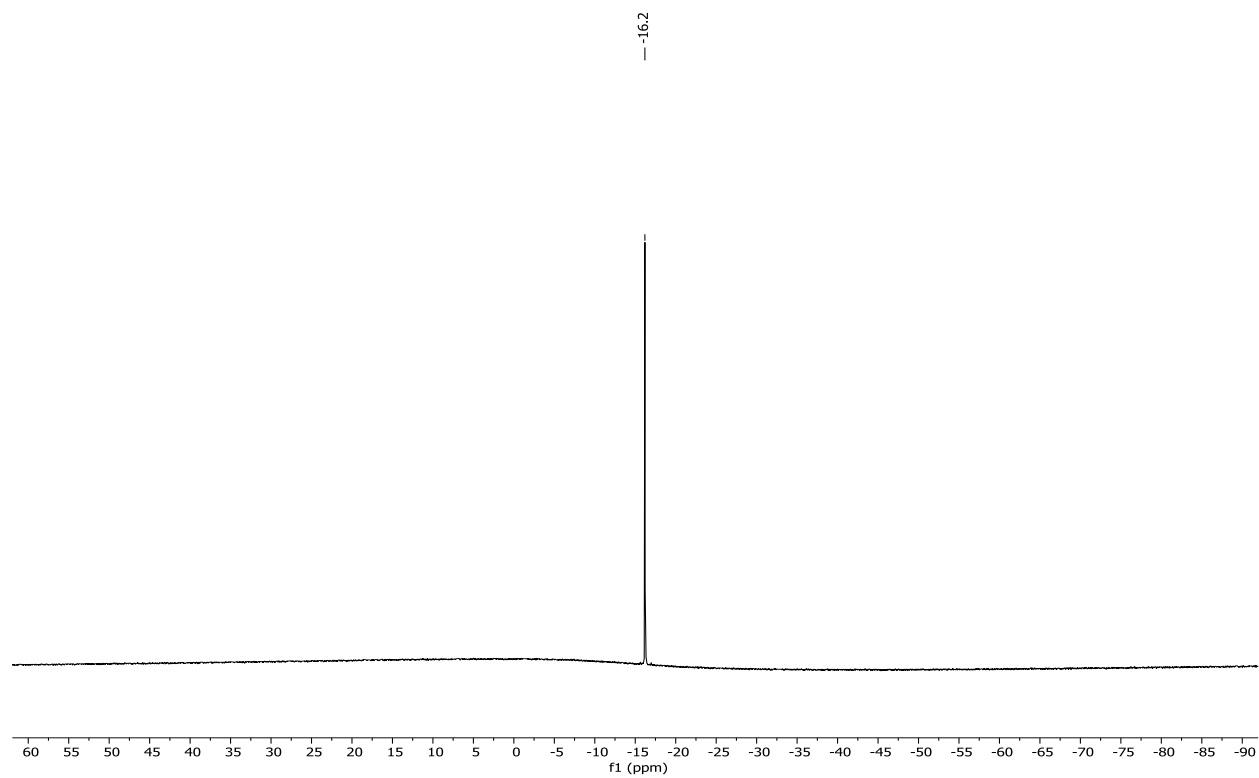

$^{19}\text{F}$  NMR spectrum of **18g**.

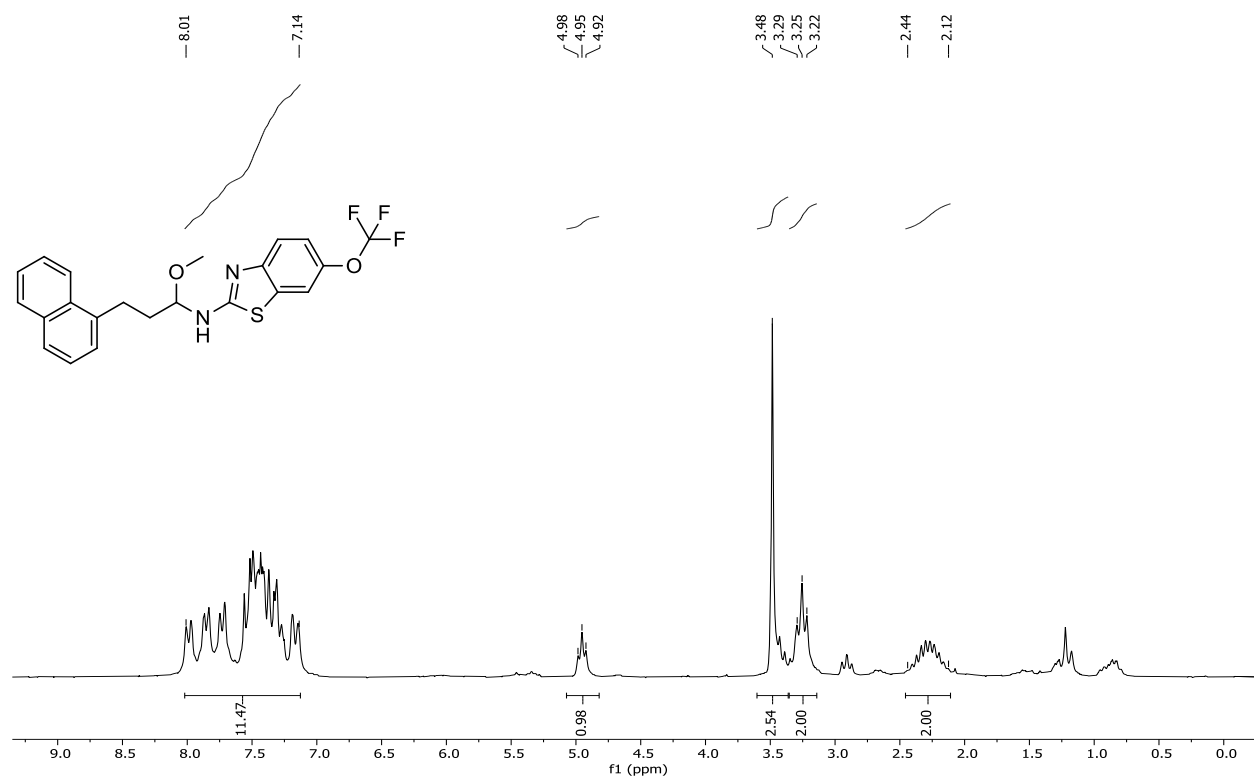

$^1\text{H}$  NMR spectrum of **18h**.



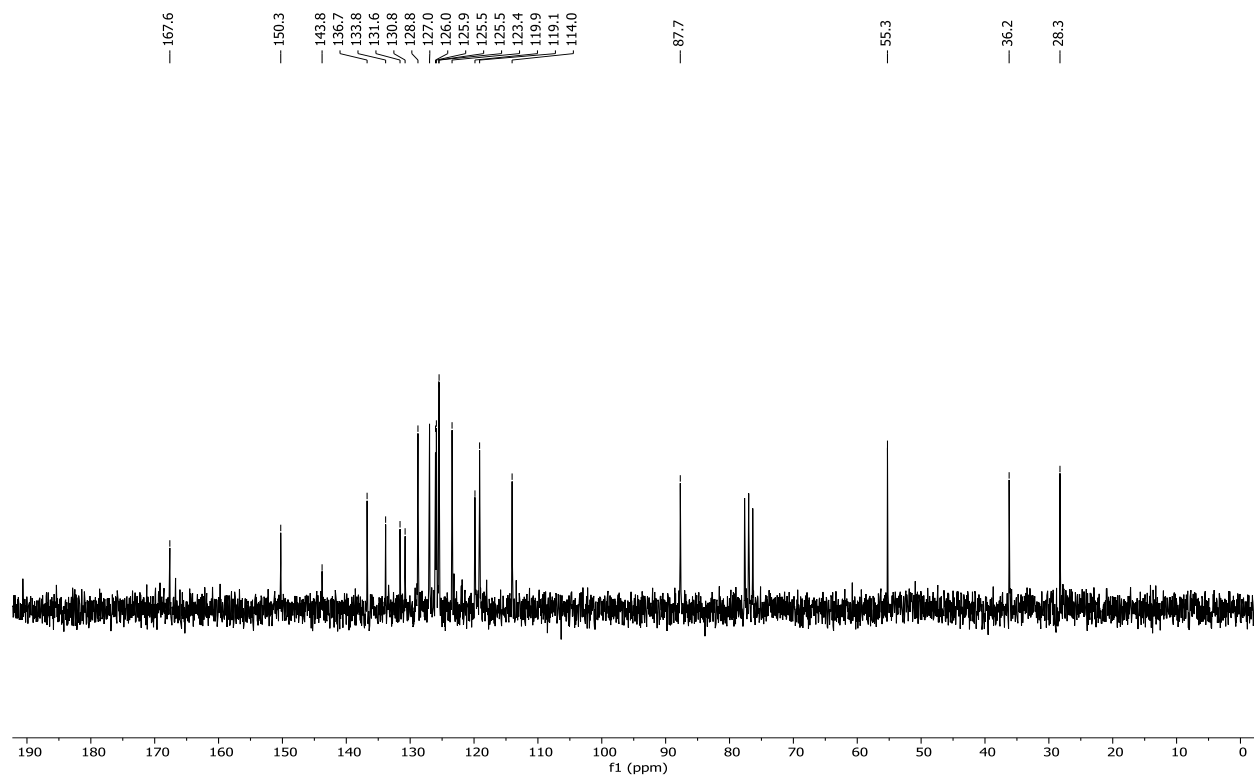

<sup>13</sup>C NMR spectrum of **18h**.

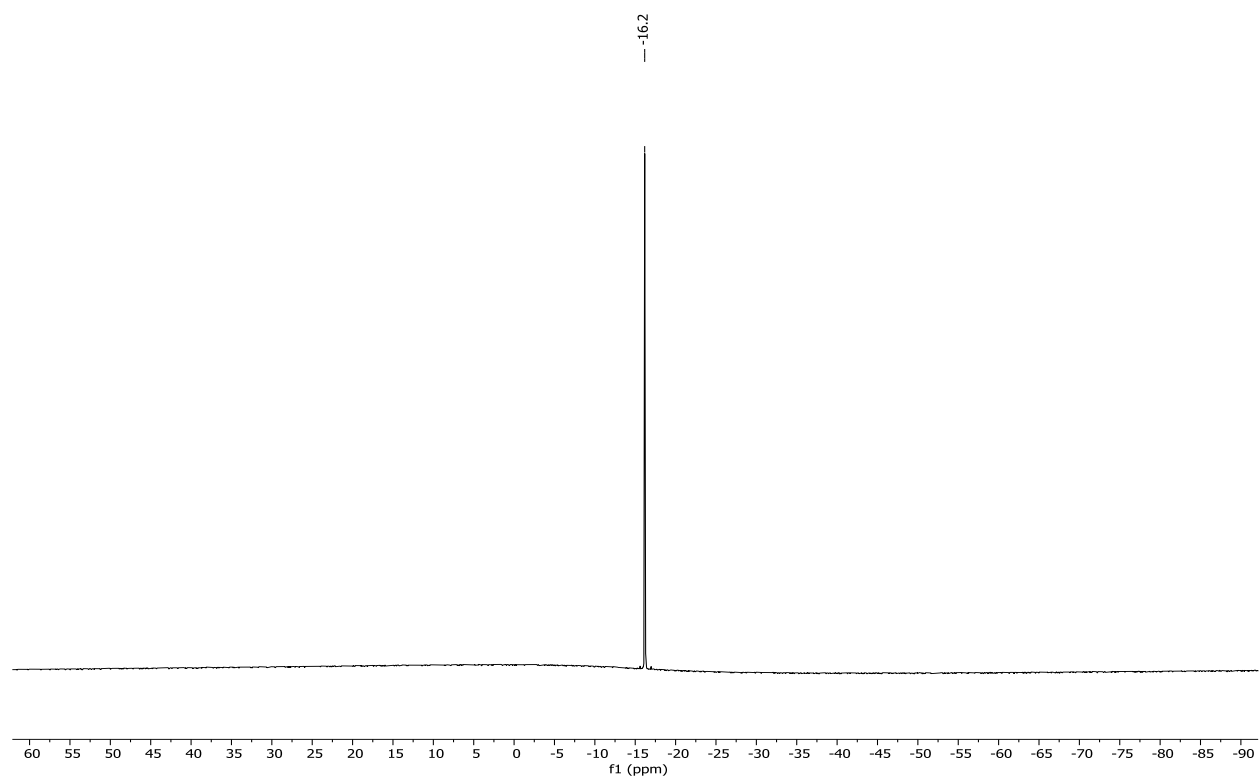

<sup>19</sup>F NMR spectrum of **18h**.

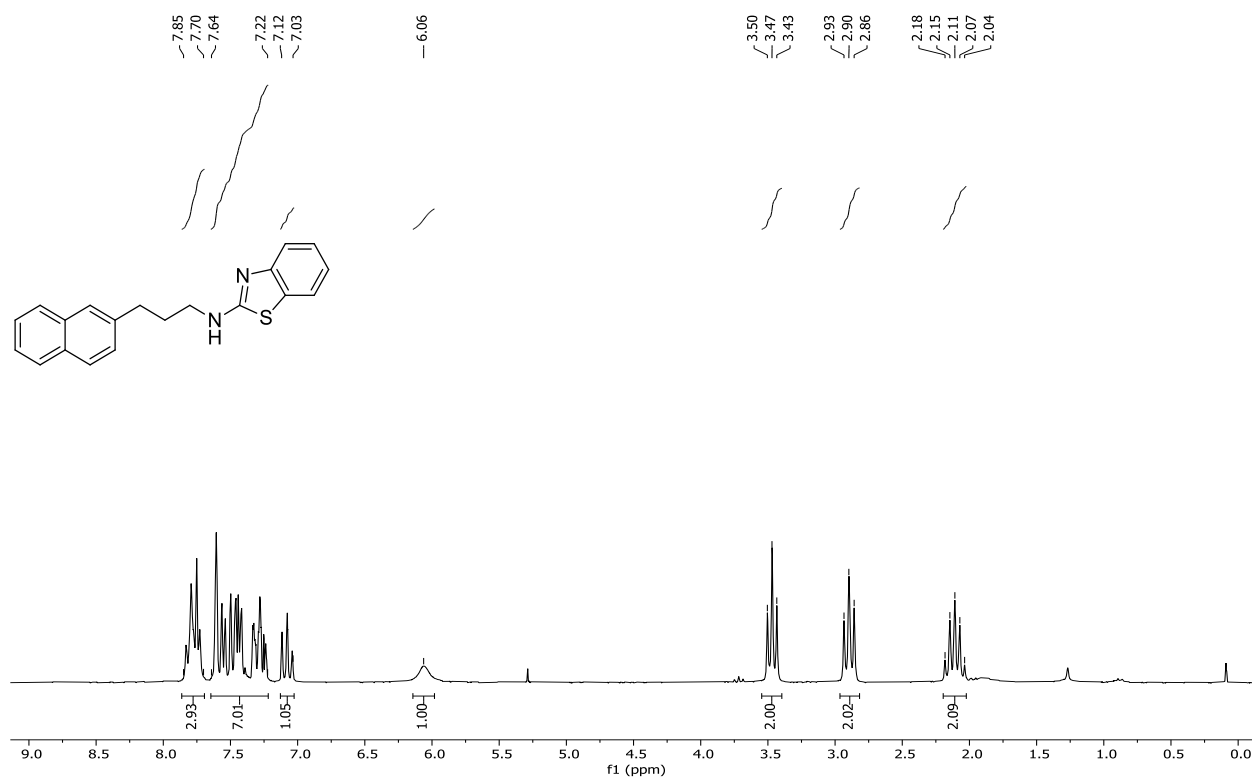

$^1\text{H}$  NMR spectrum of 19a.

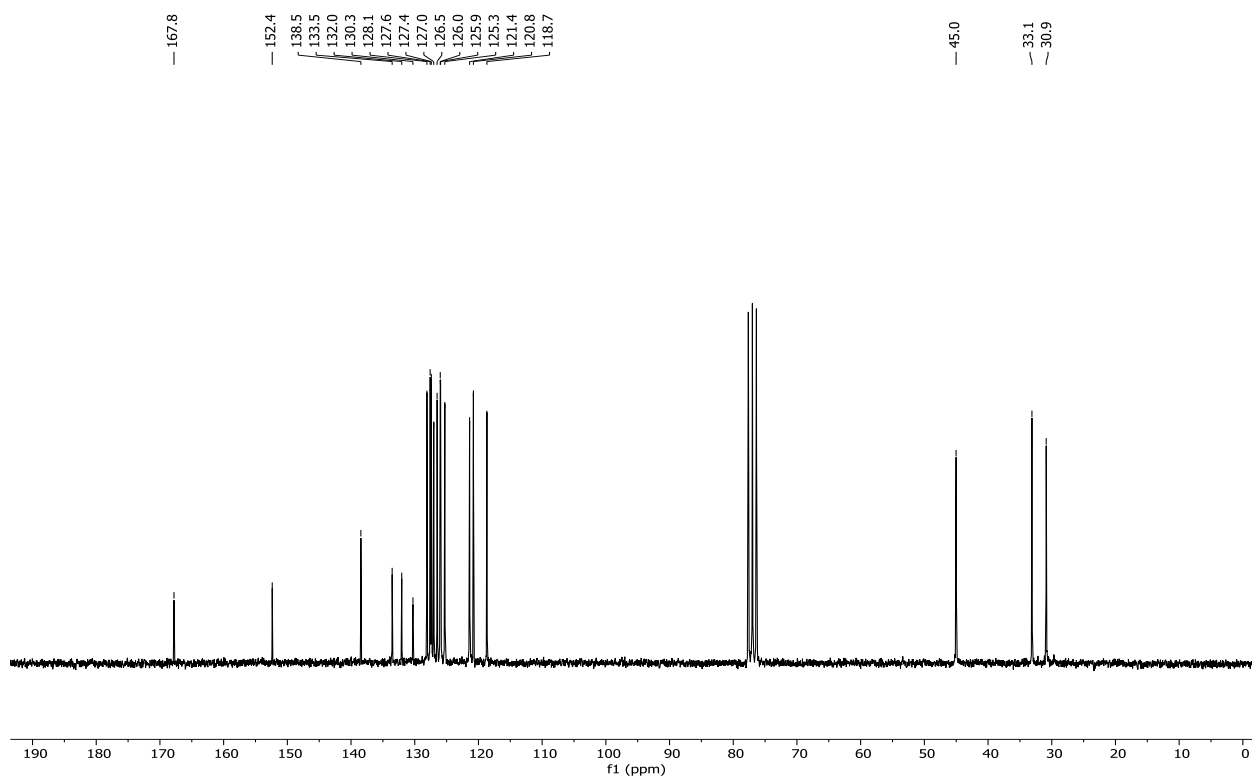

$^{13}\text{C}$  NMR spectrum of 19a.

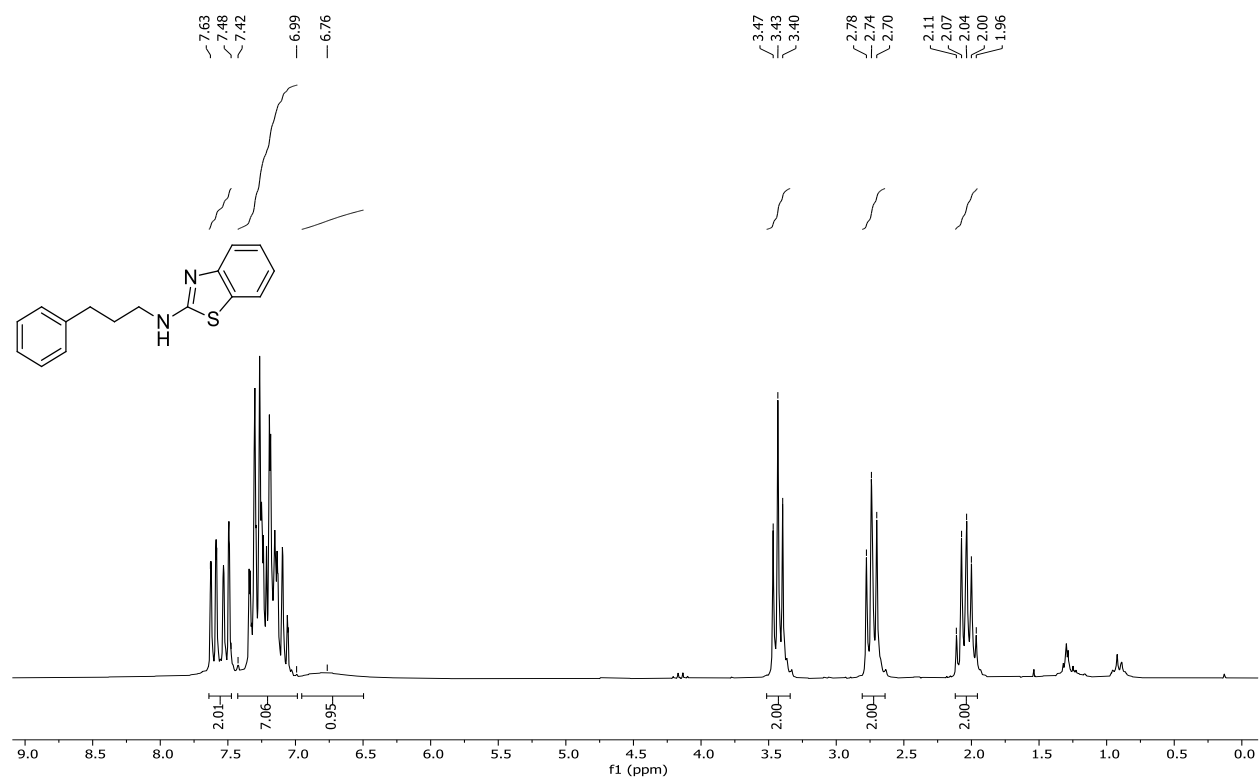

<sup>1</sup>H NMR spectrum of **19b**.

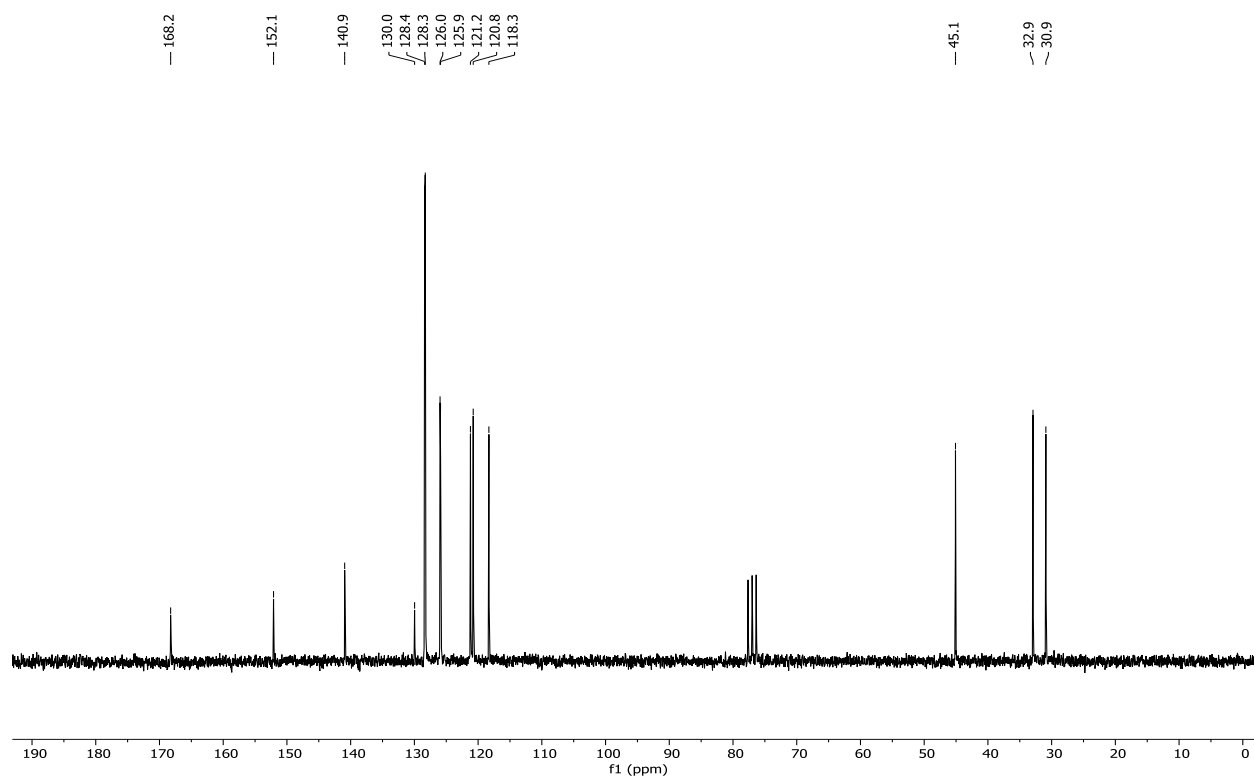

<sup>13</sup>C NMR spectrum of **19b**.

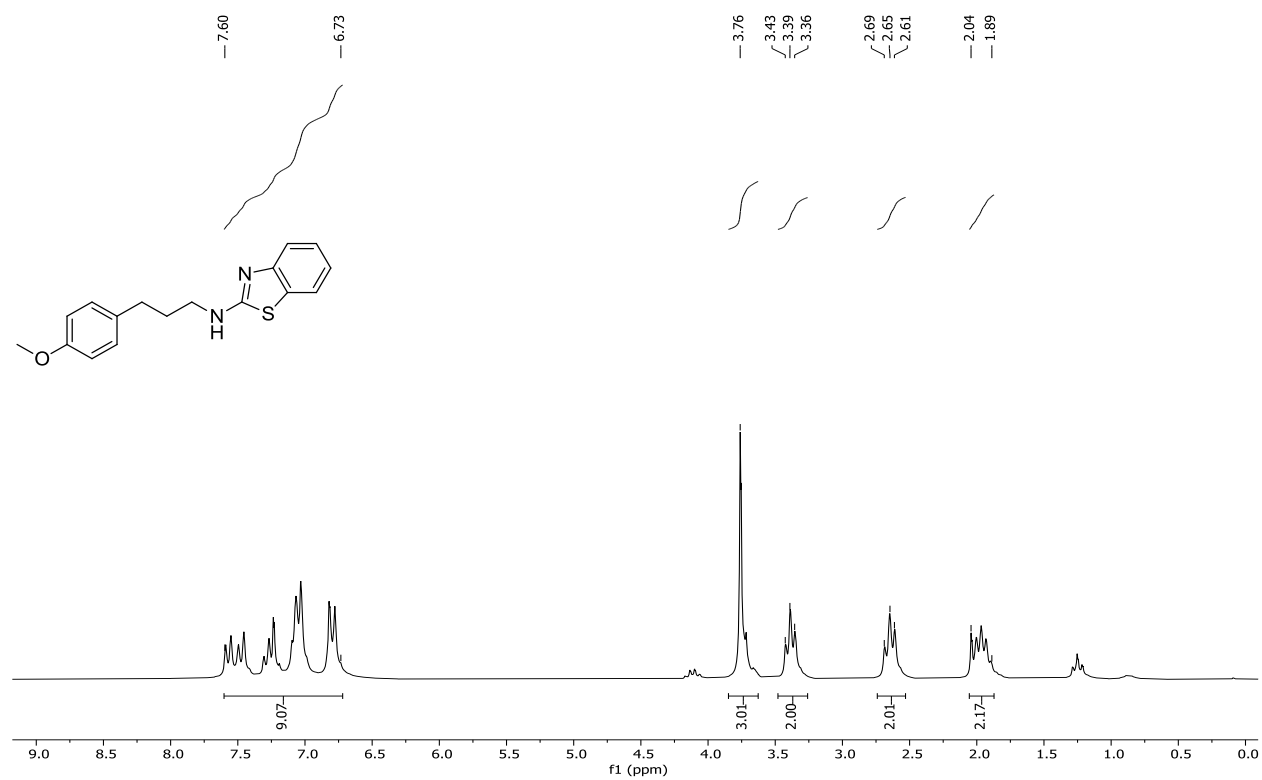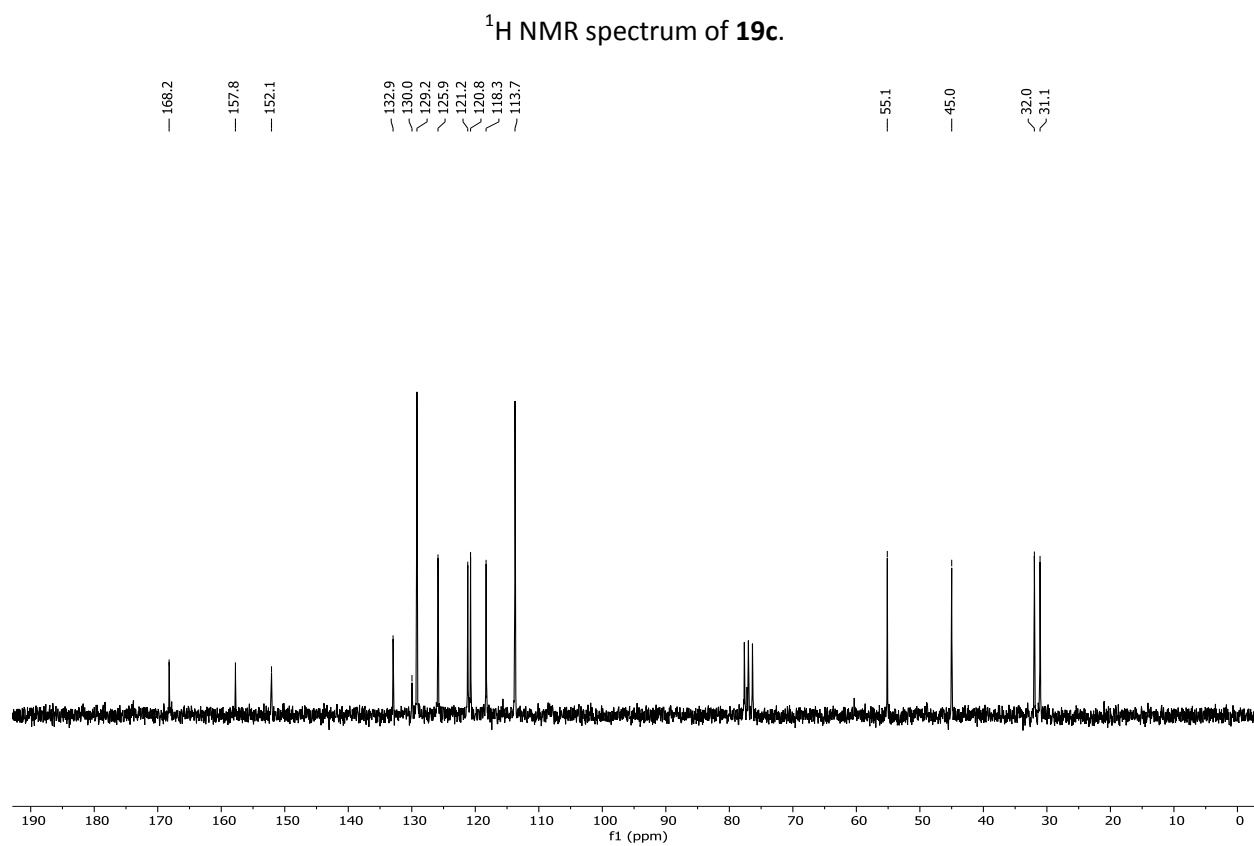

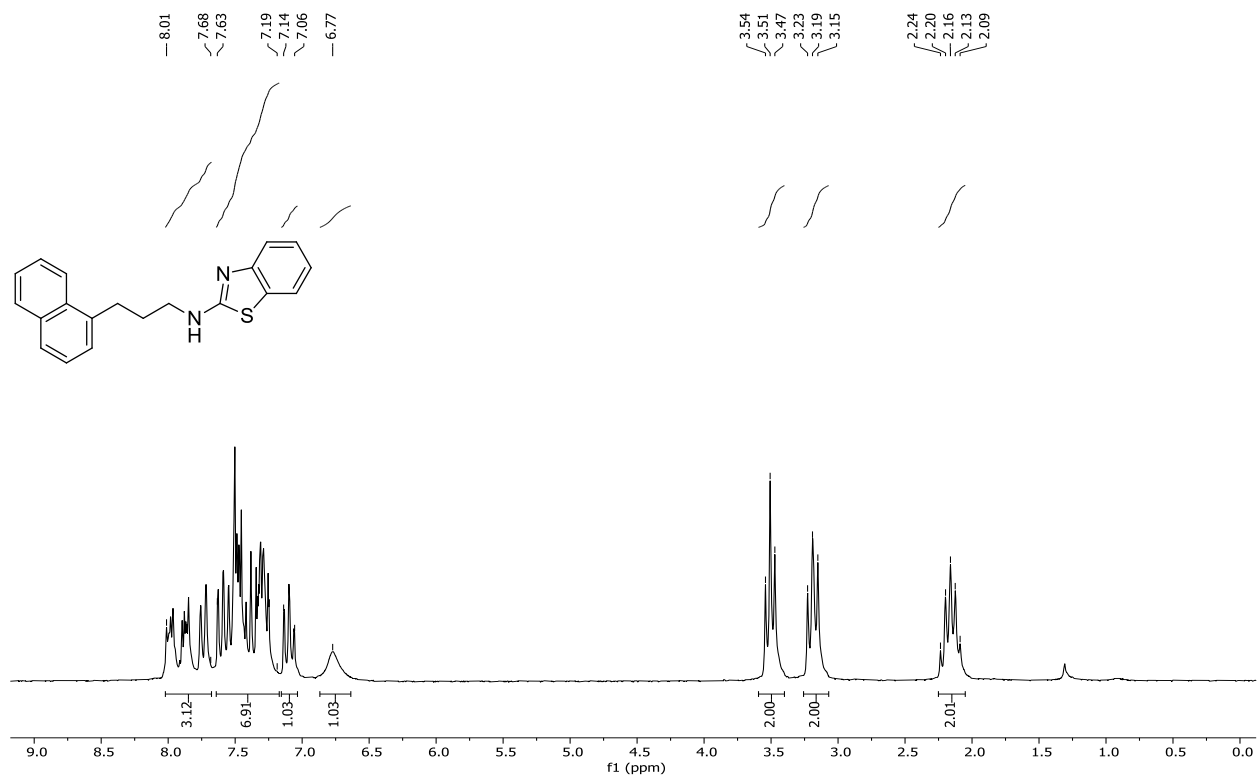

<sup>1</sup>H NMR spectrum of **19d**.

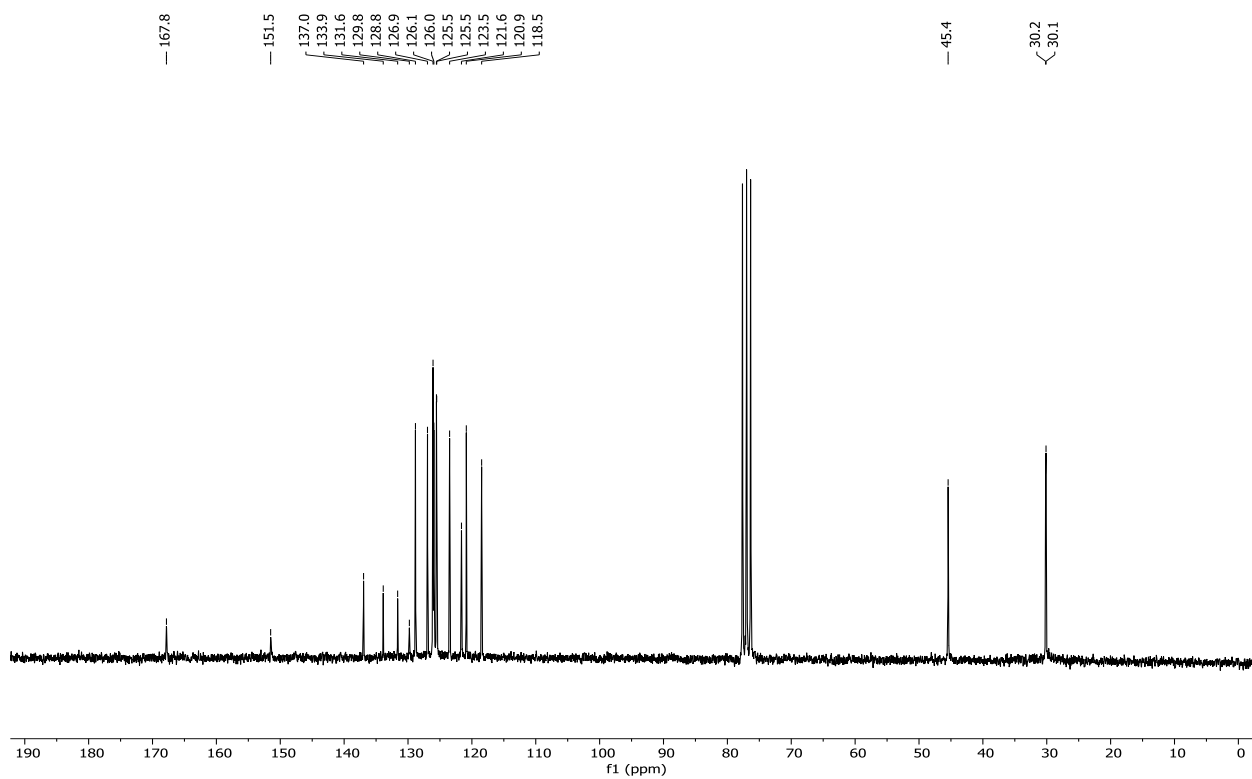

<sup>13</sup>C NMR spectrum of **19d**.

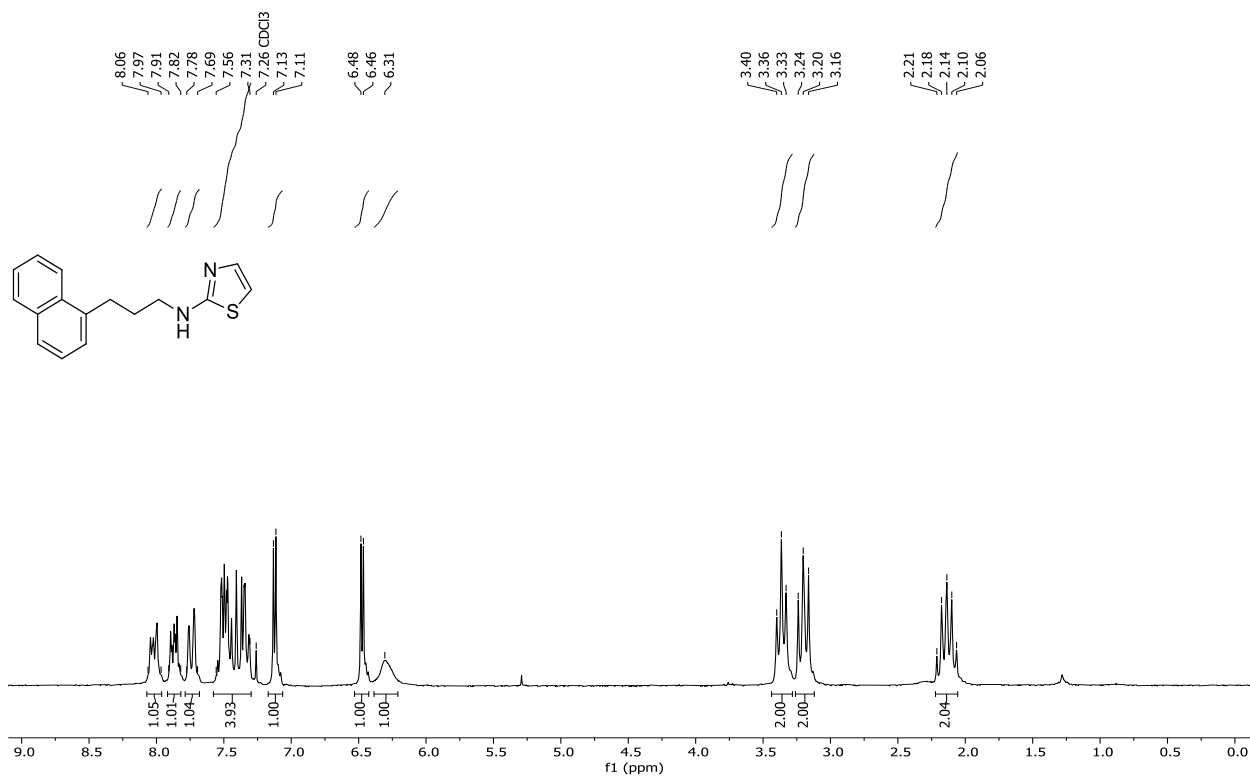

<sup>1</sup>H NMR spectrum of **19e**.

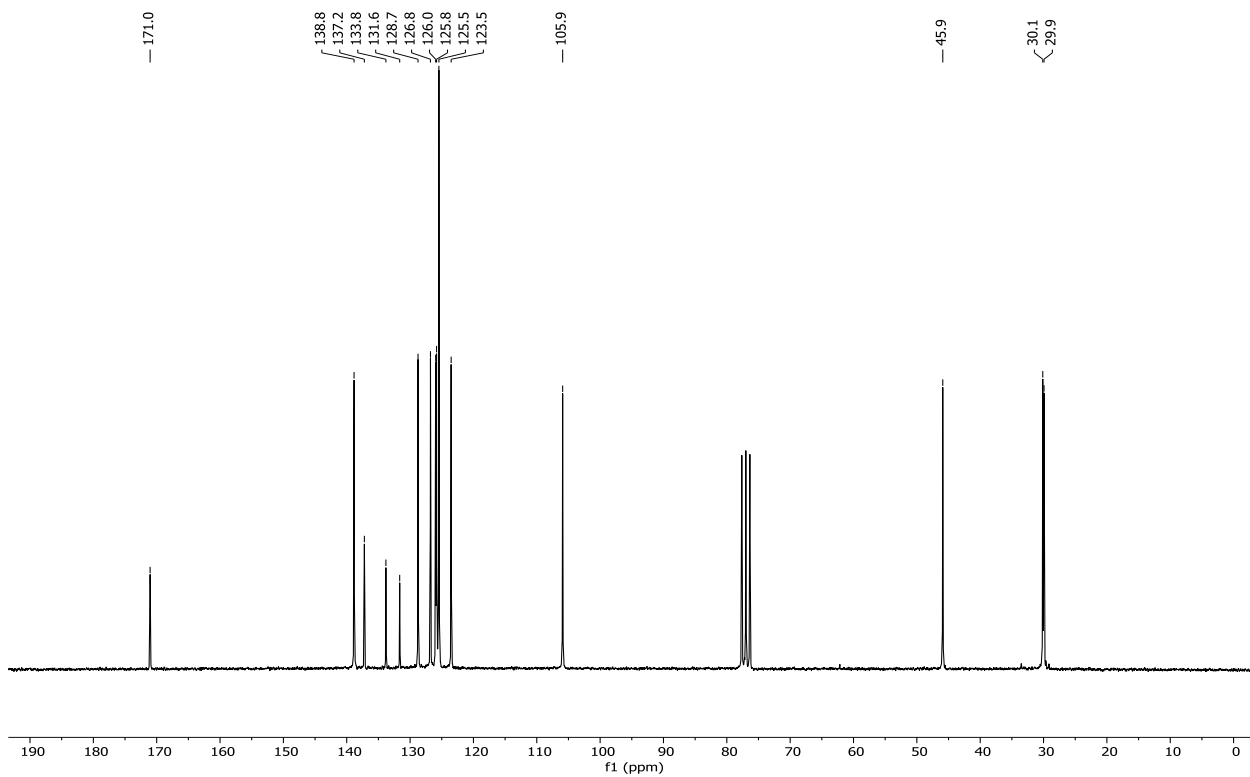

<sup>13</sup>C NMR spectrum of **19e**.

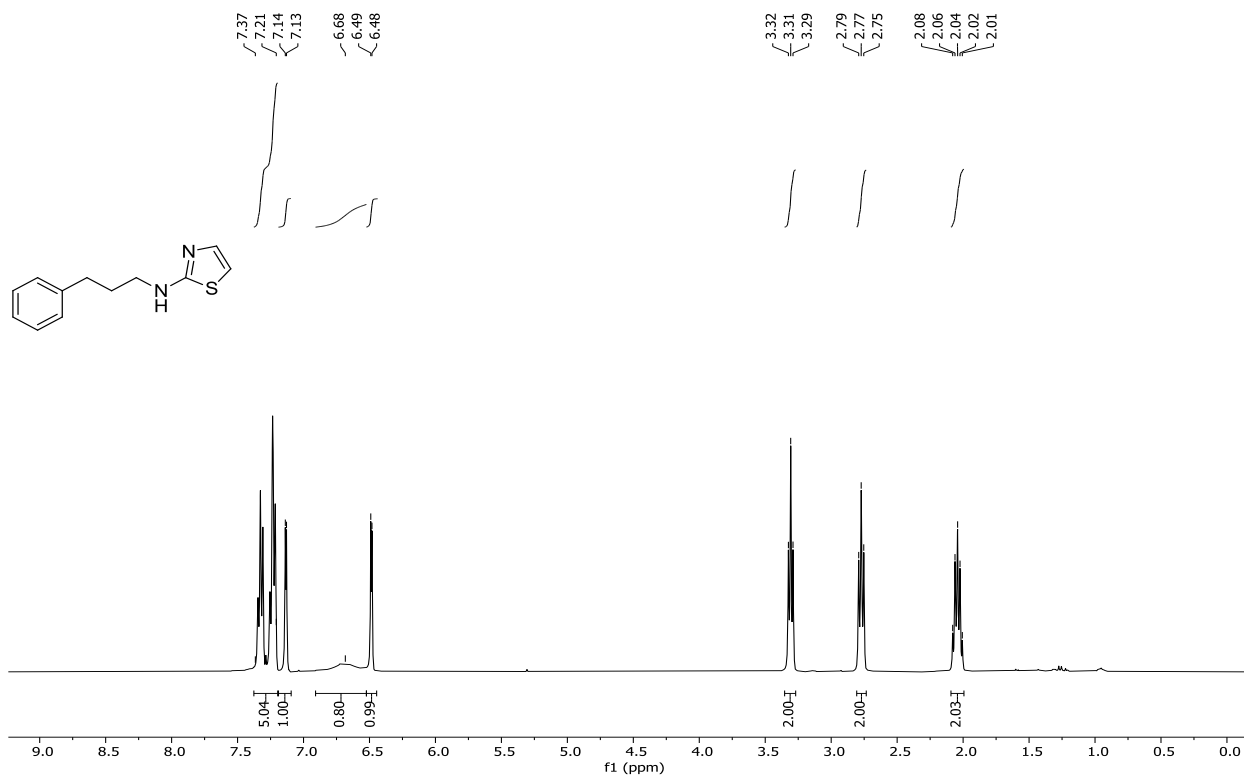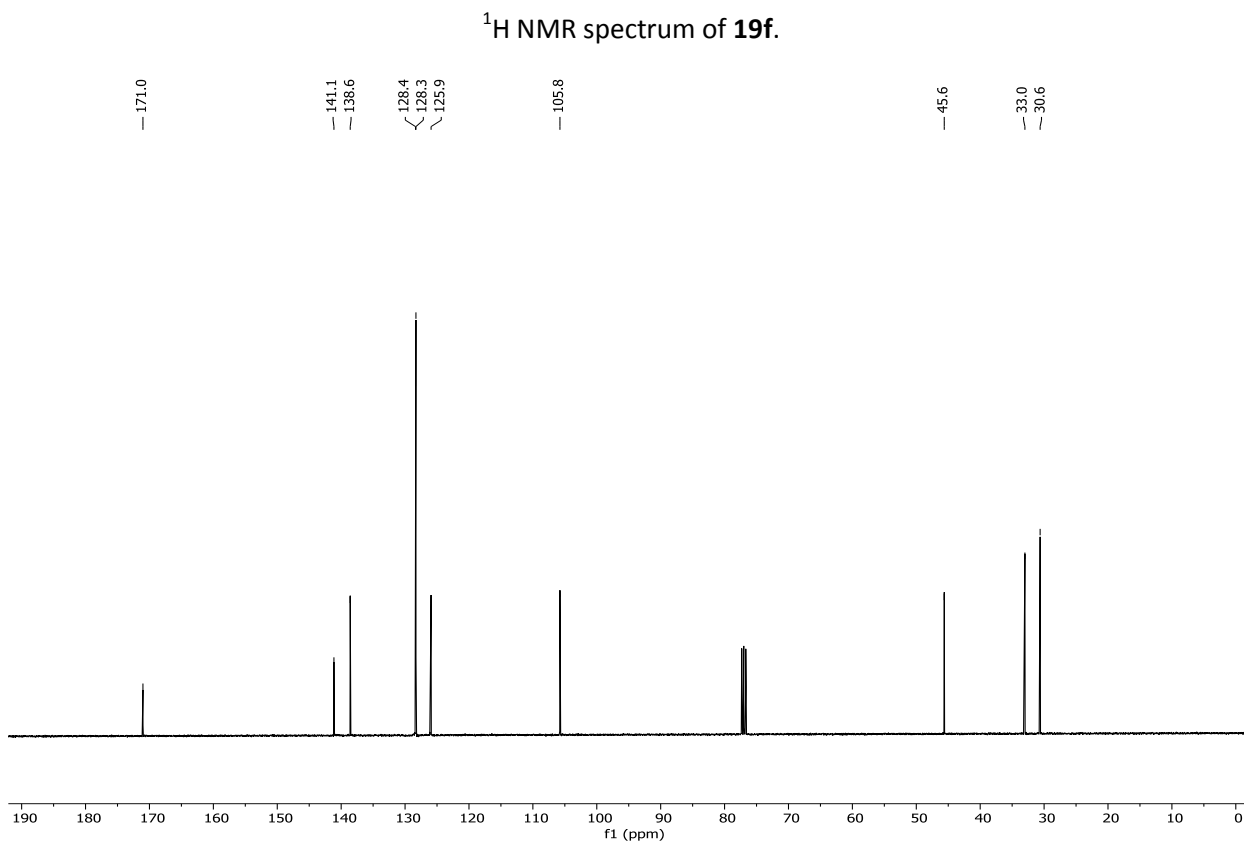

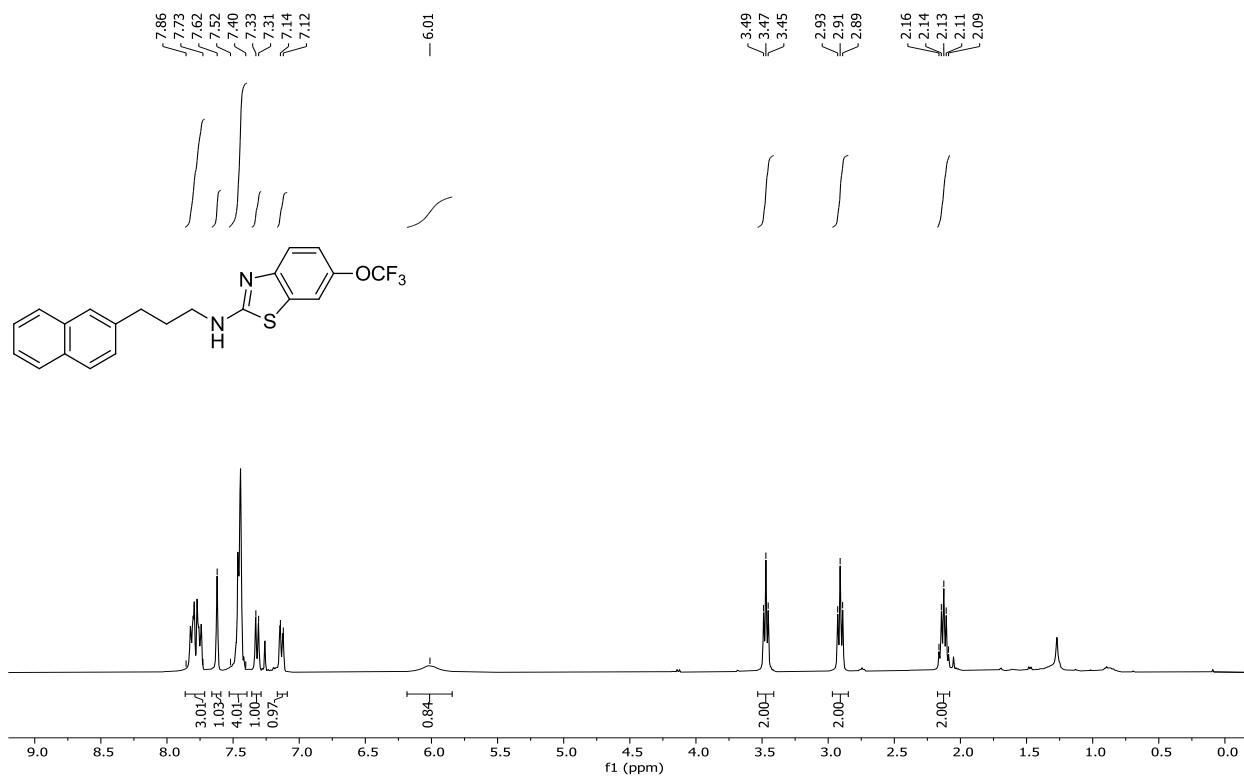

$^1\text{H}$  NMR spectrum of **19g**.

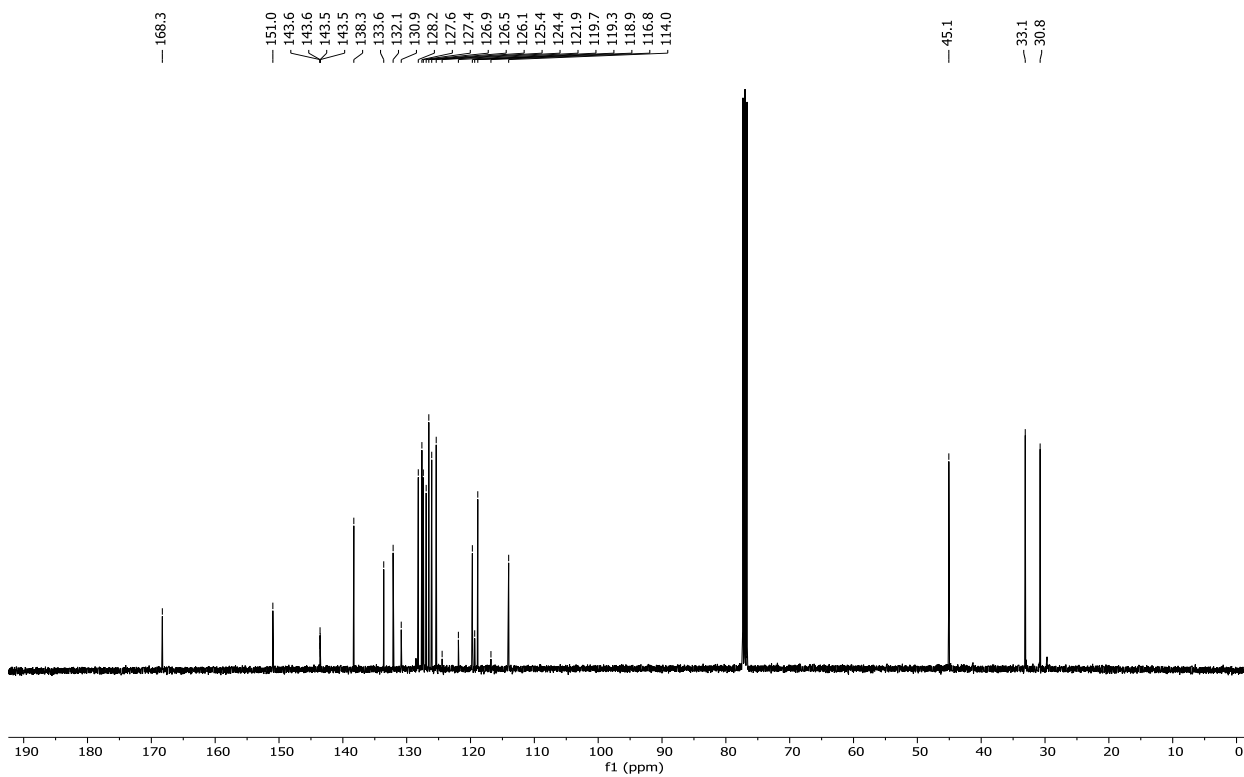

$^{13}\text{C}$  NMR spectrum of **19g**.



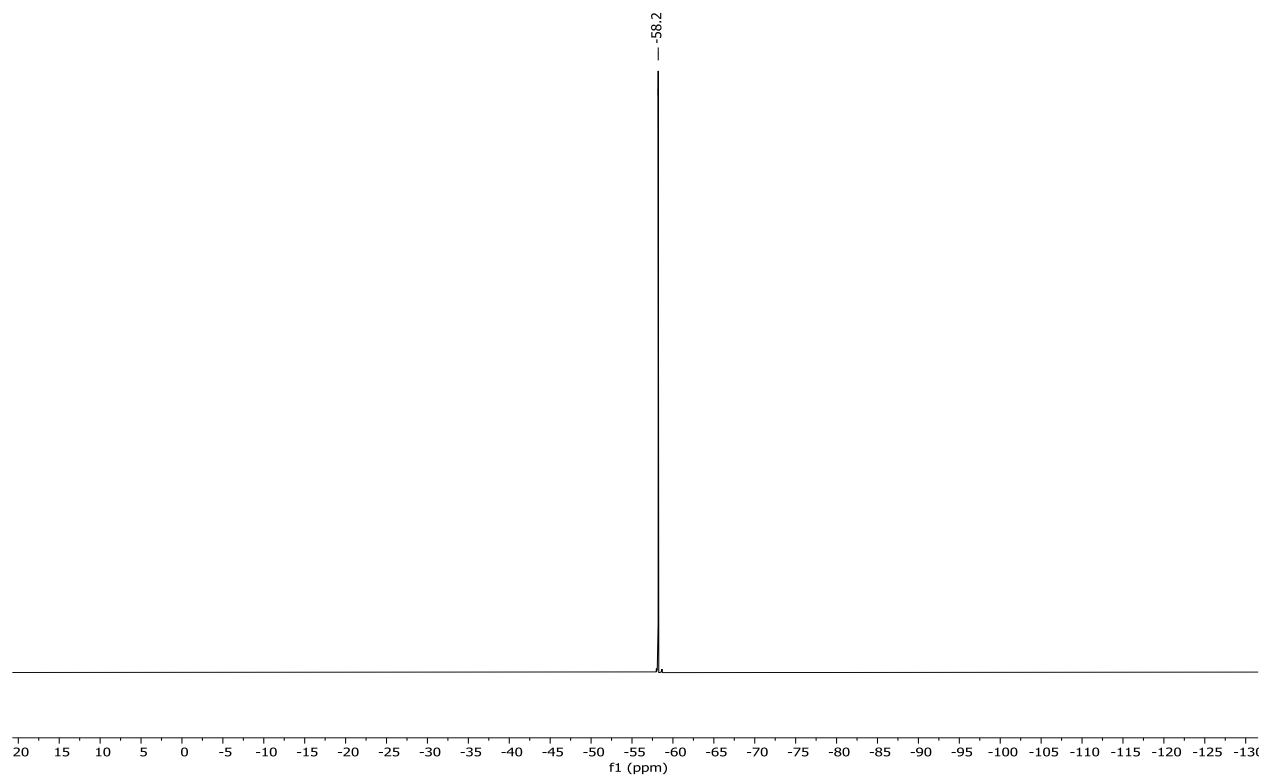

$^{19}\text{F}$  NMR spectrum of **19g**.

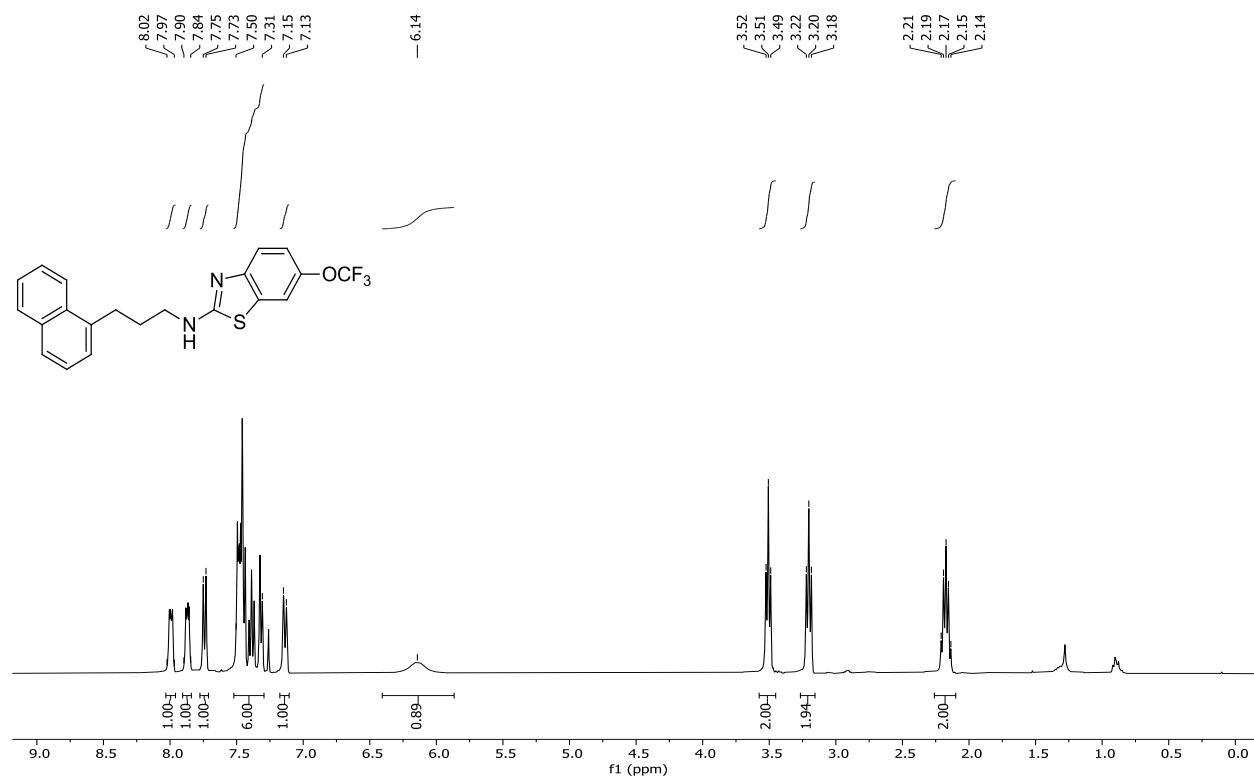

$^1\text{H}$  NMR spectrum of **19h**.

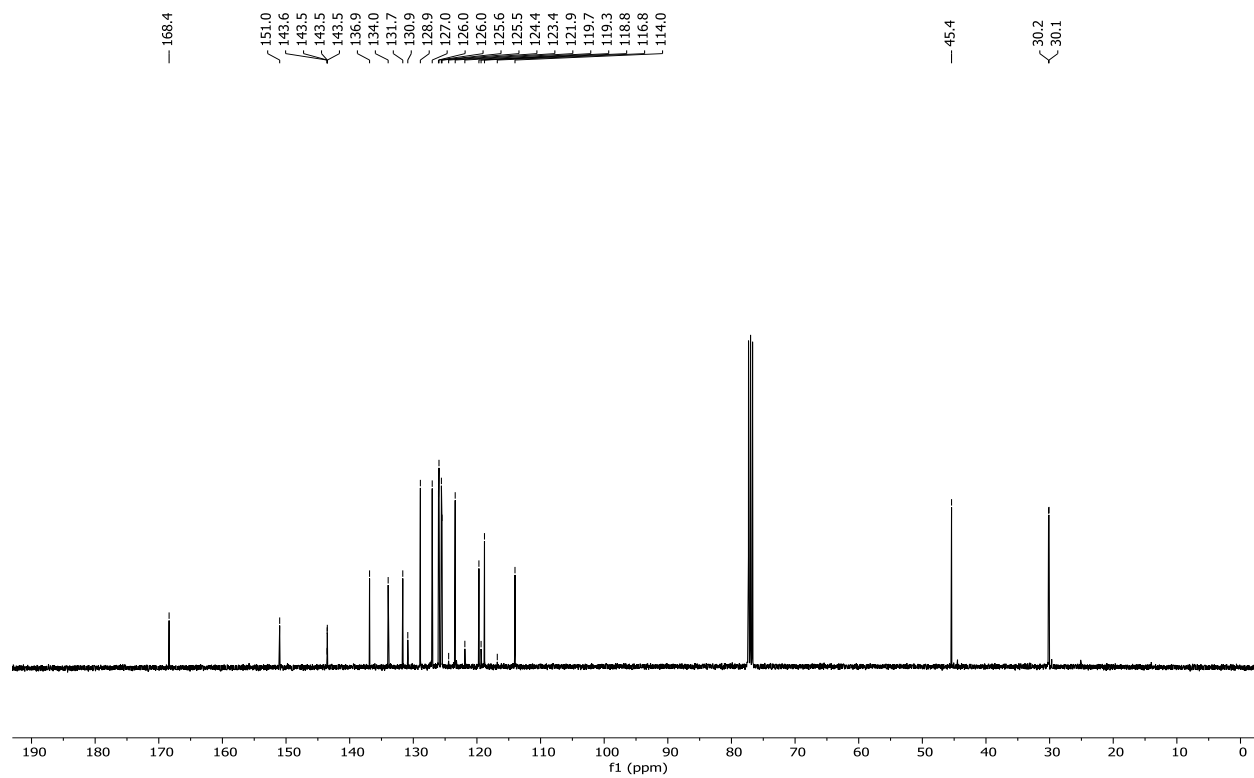

<sup>13</sup>C NMR spectrum of **19h**.

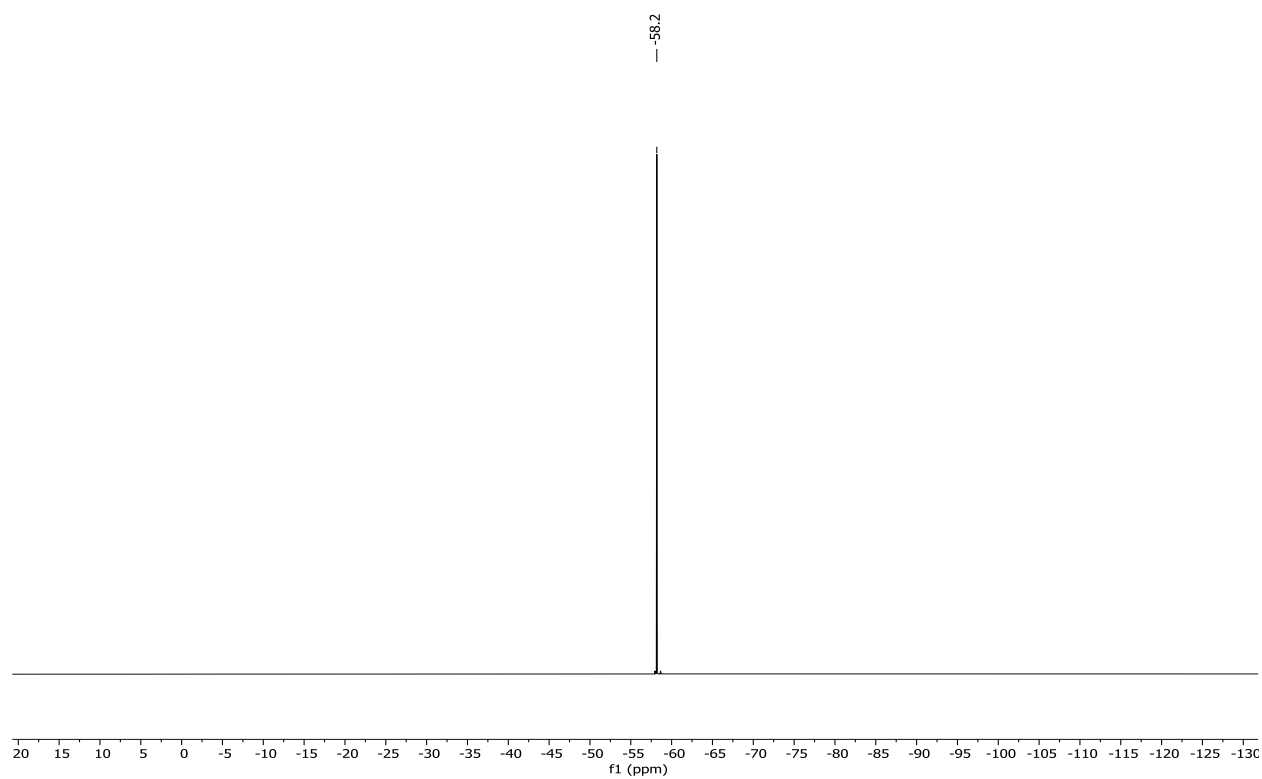

<sup>19</sup>F NMR spectrum of **19h**.

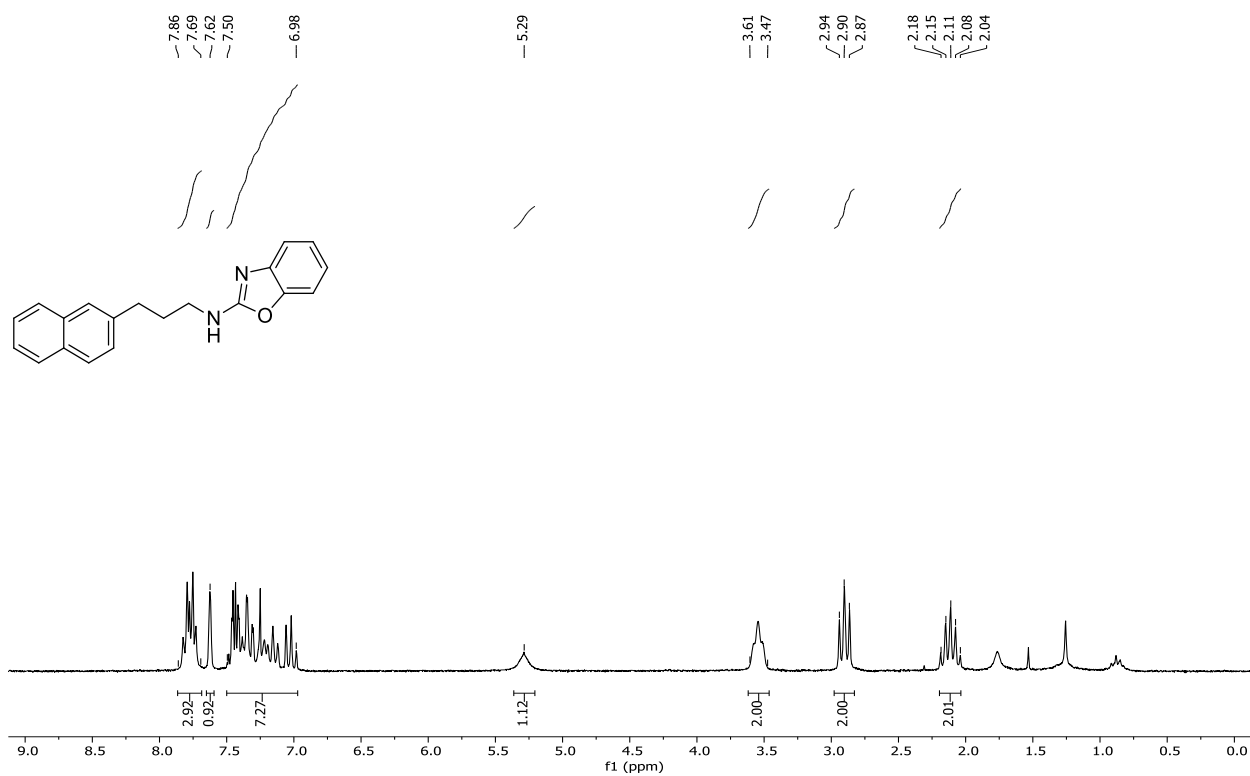

<sup>1</sup>H NMR spectrum of **23a**.

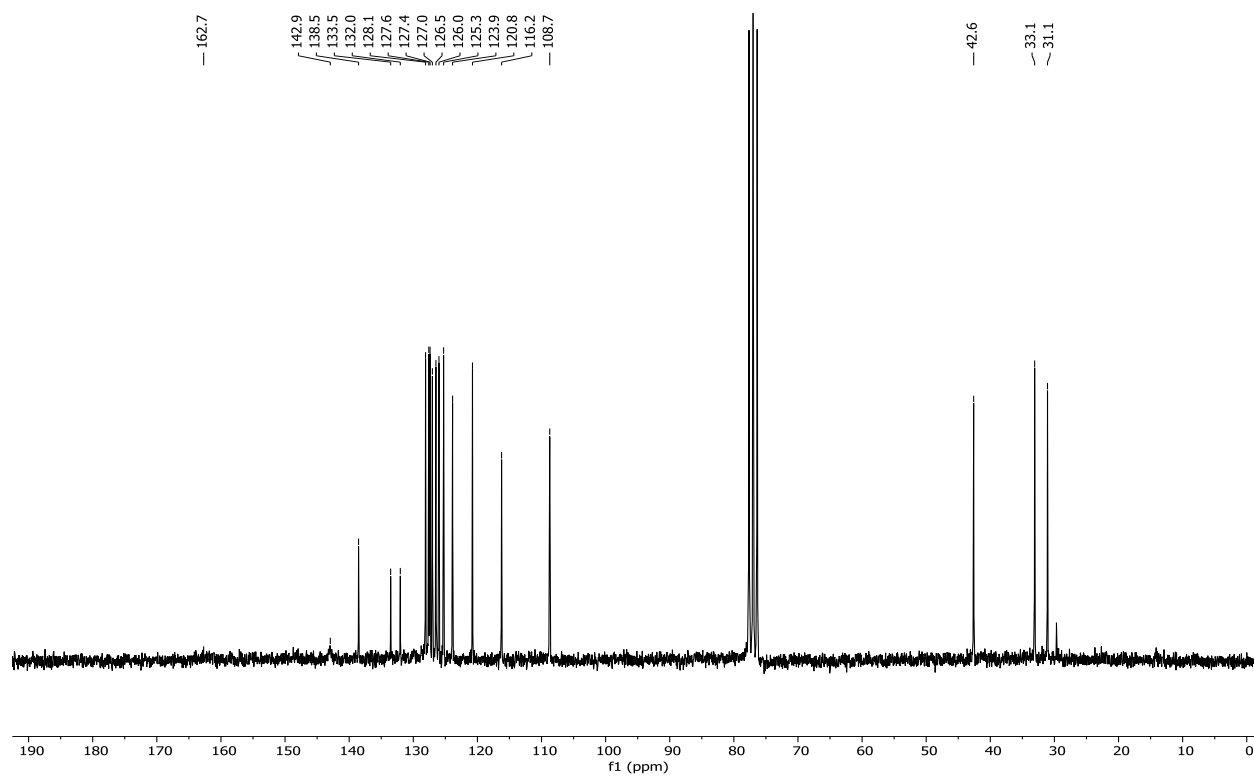

<sup>13</sup>C NMR spectrum of **23a**.

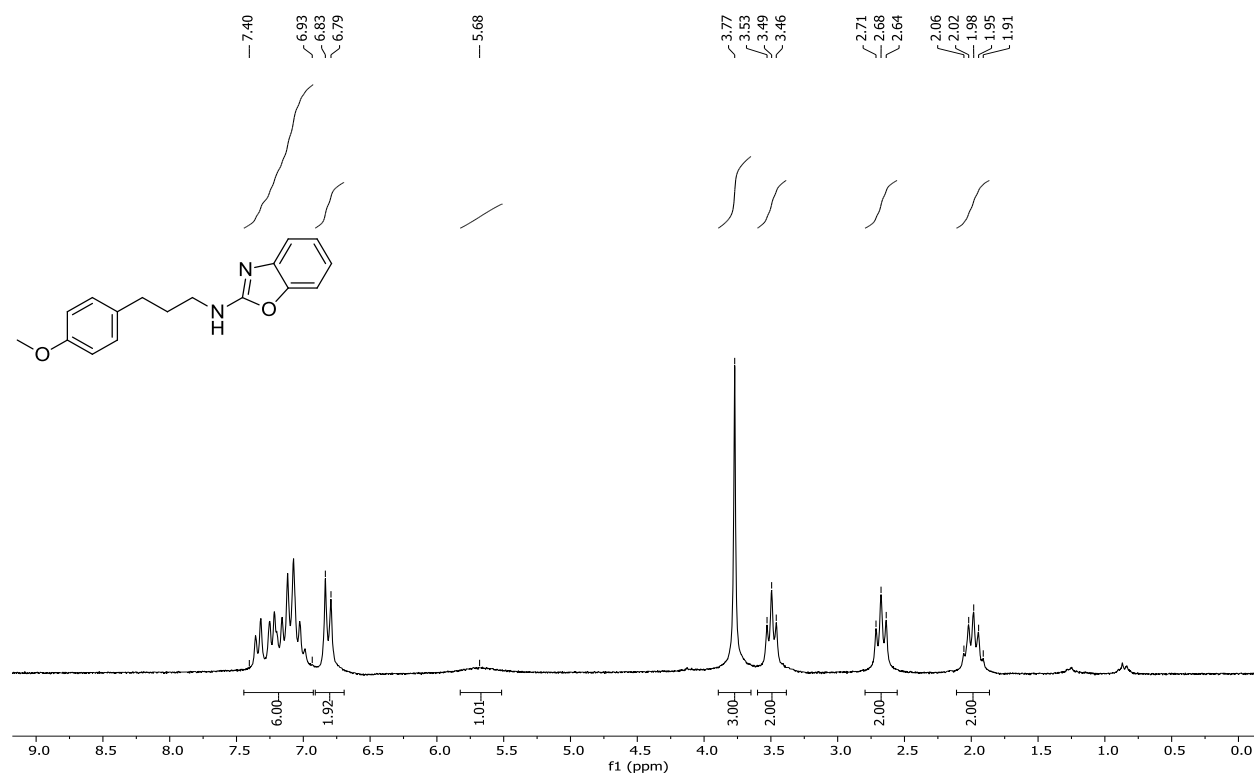

<sup>1</sup>H NMR spectrum of **23b**.

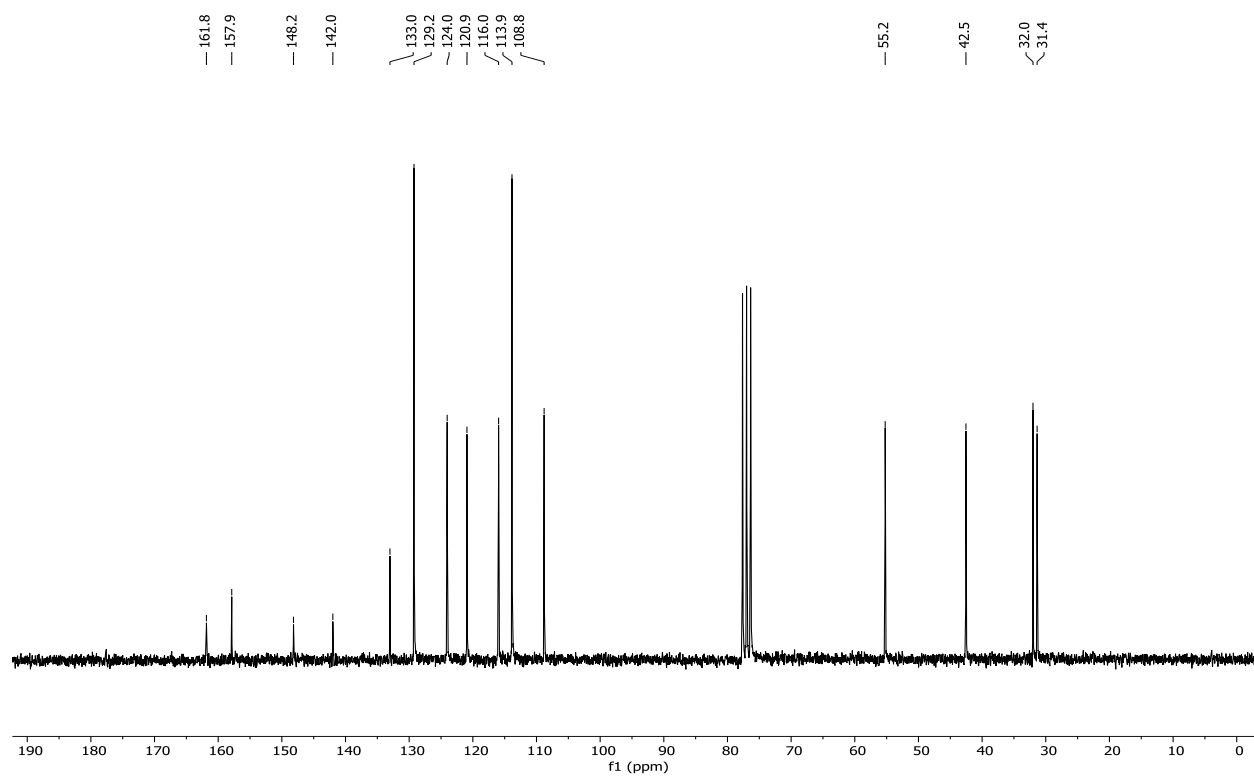

<sup>13</sup>C NMR spectrum of **23b**.

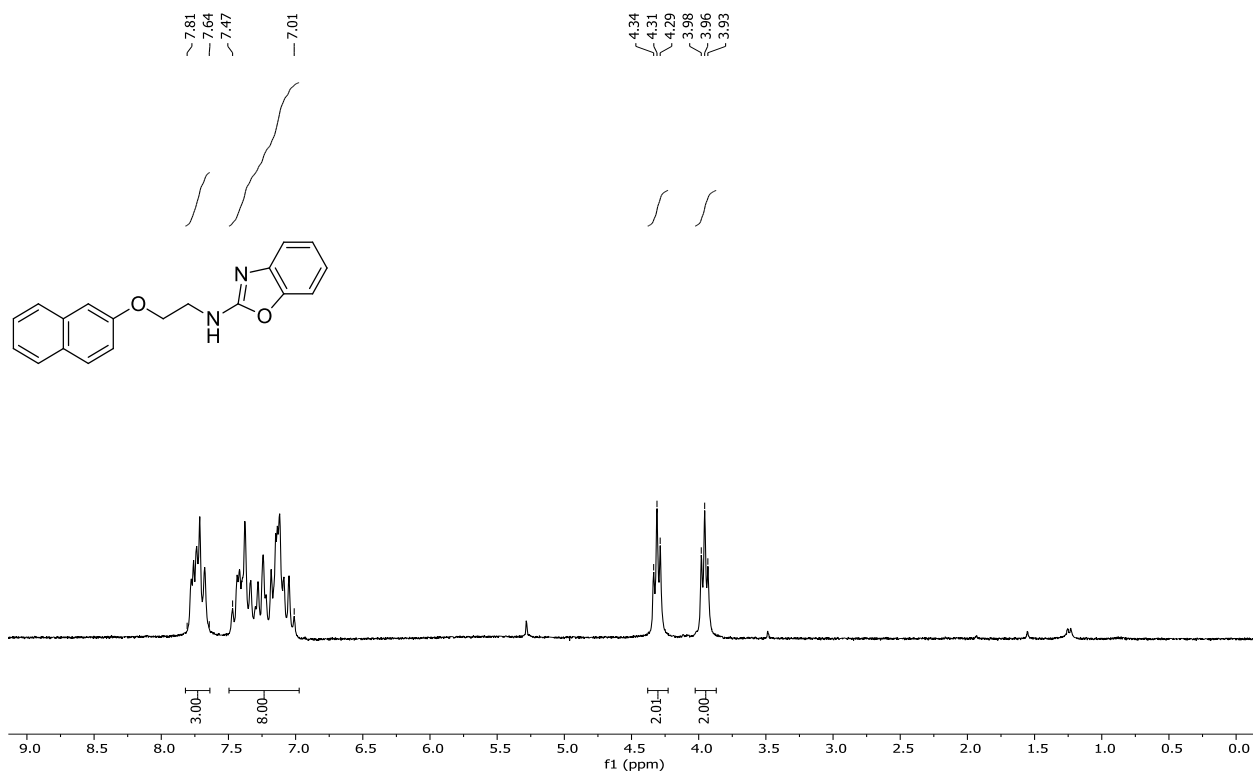

<sup>1</sup>H NMR spectrum of **23c**.

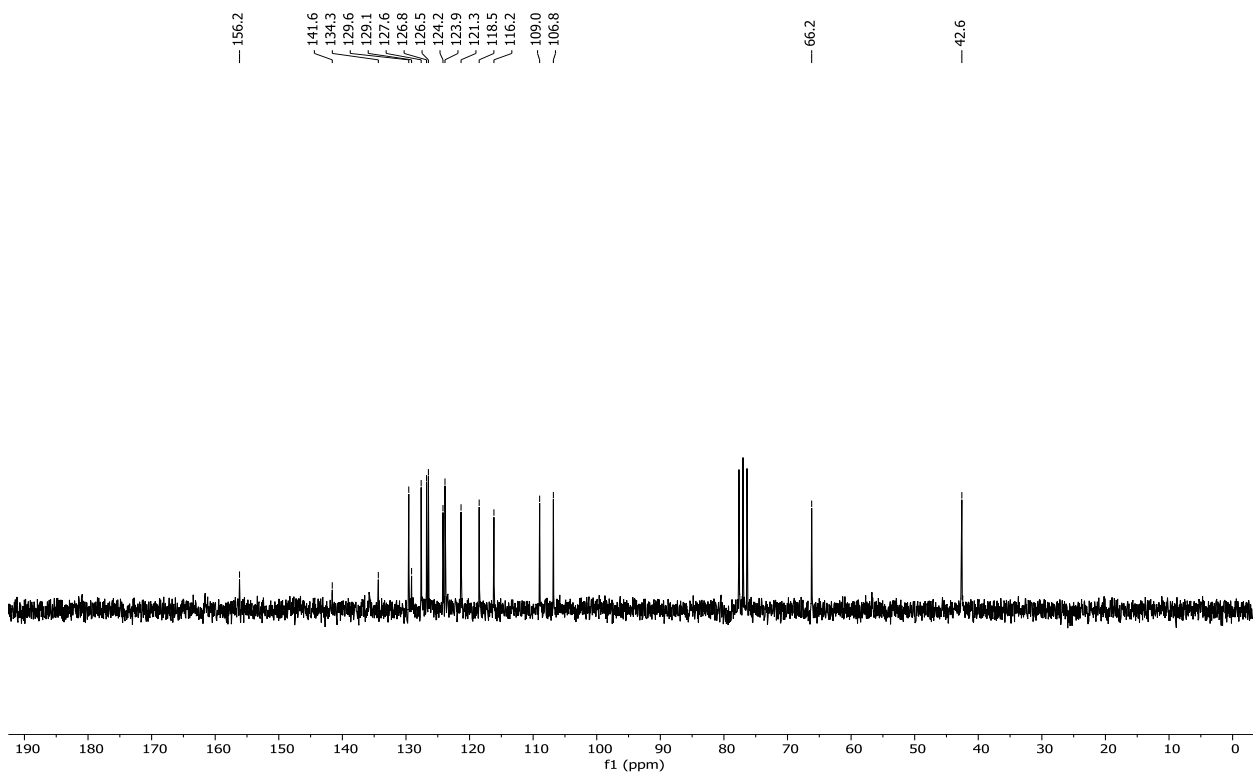

<sup>13</sup>C NMR spectrum of **23c**.

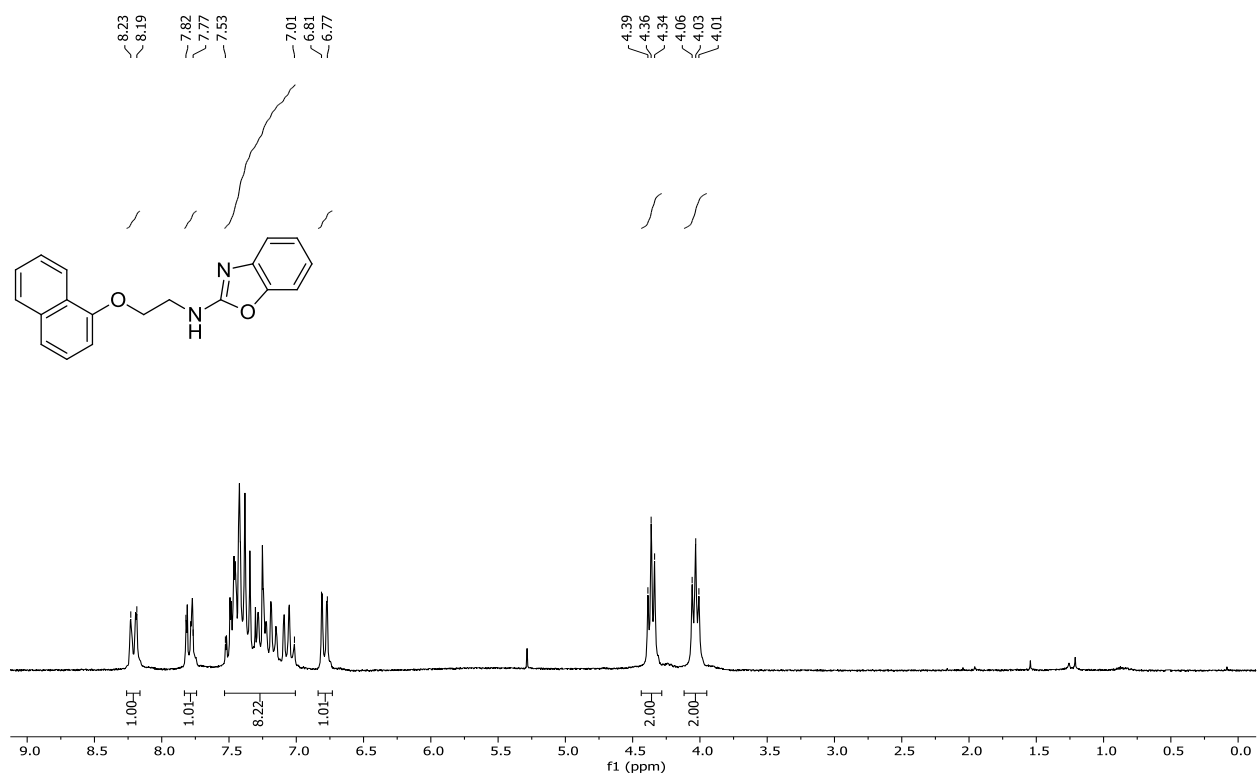

<sup>1</sup>H NMR spectrum of **23d**.

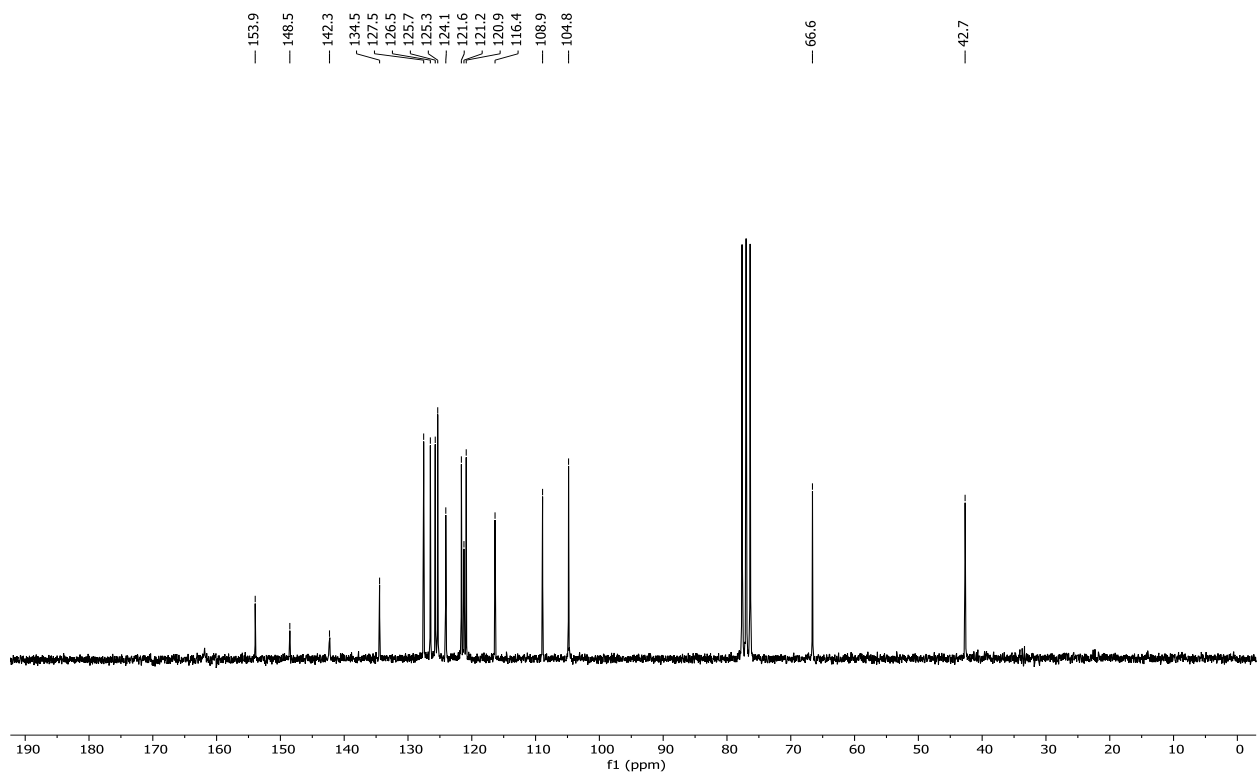

<sup>13</sup>C NMR spectrum of **23d**.

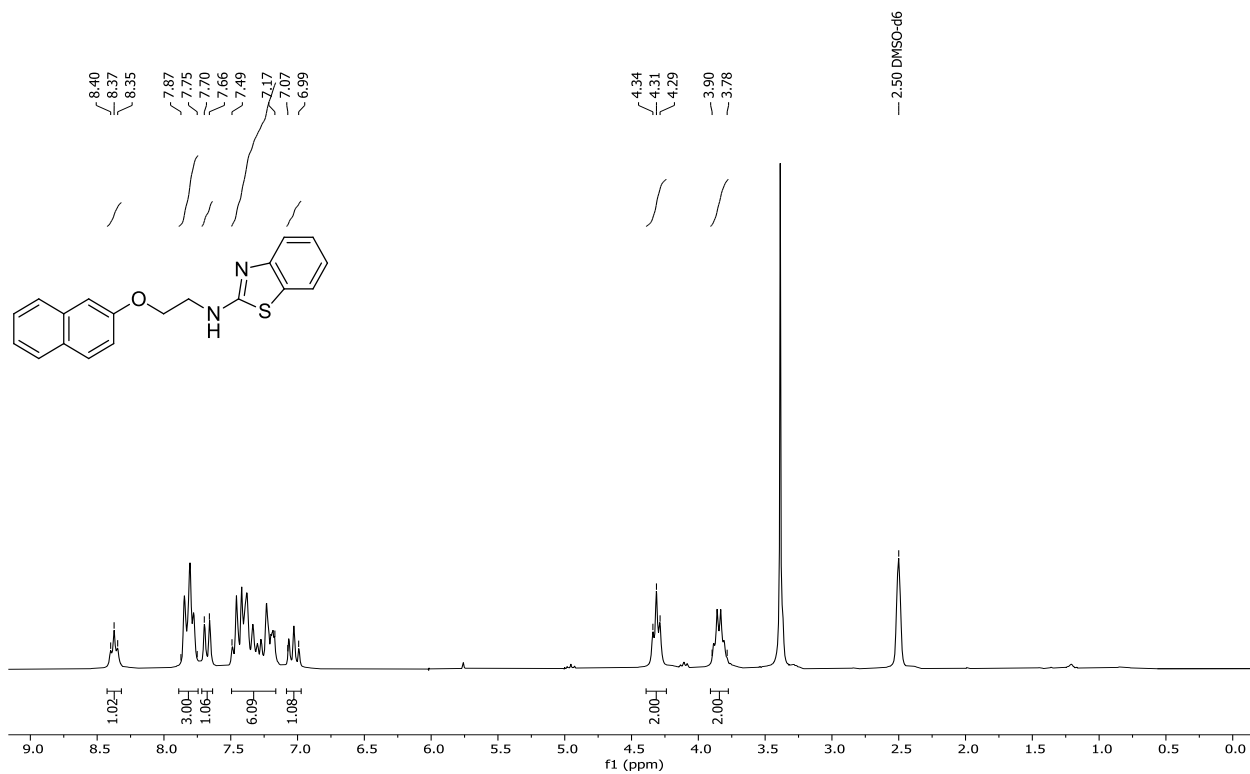

<sup>1</sup>H NMR spectrum of **25a**.

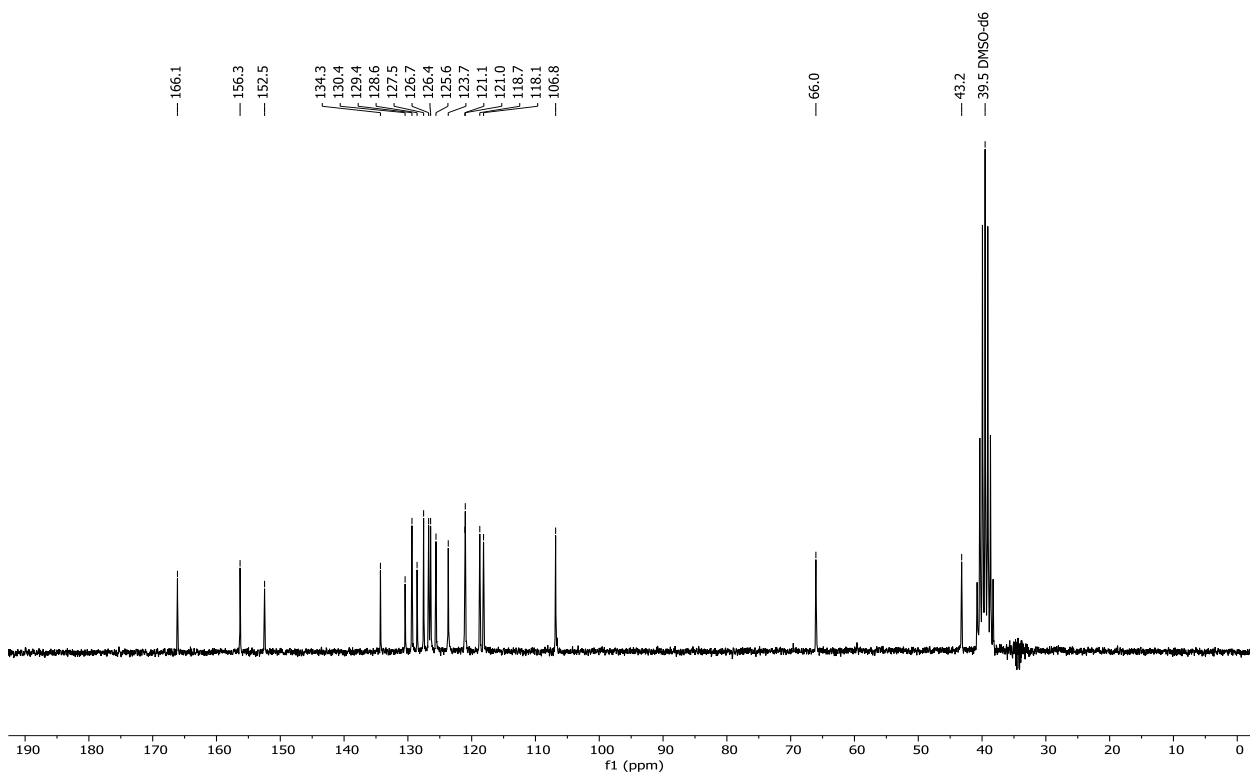

<sup>13</sup>C NMR spectrum of **25a**.

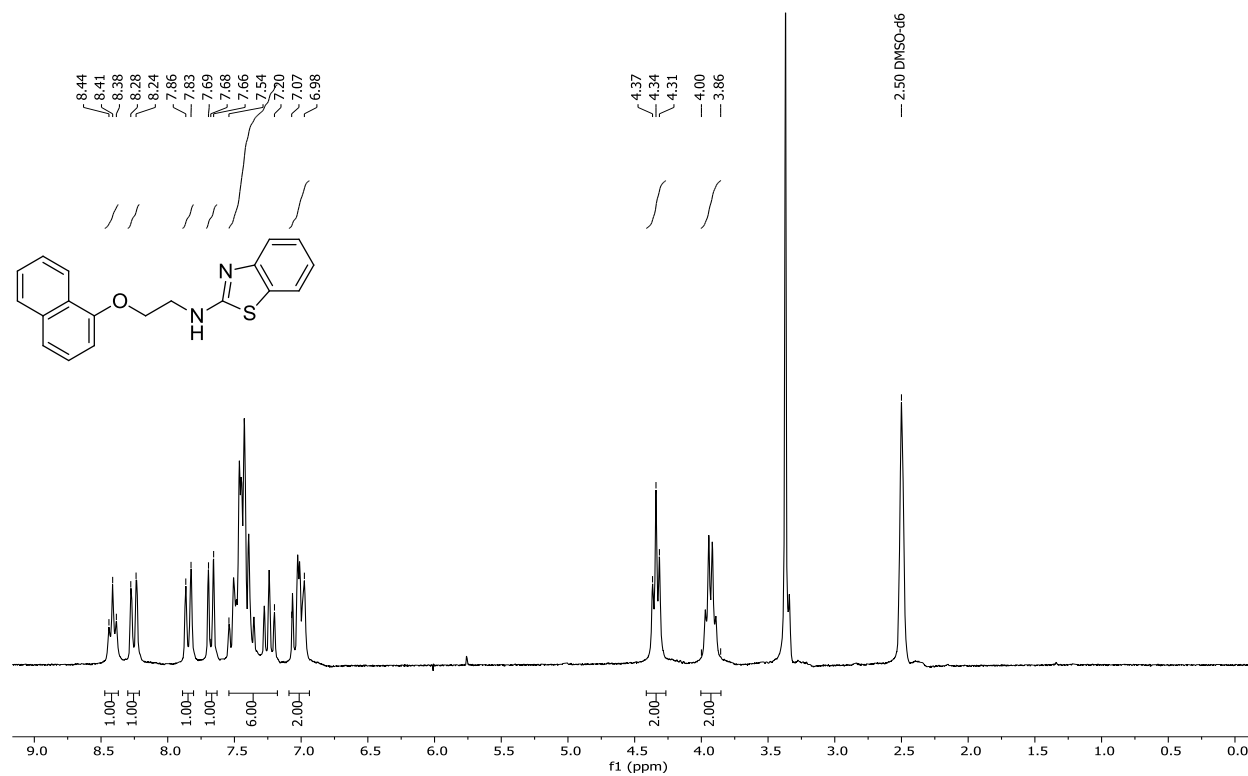

<sup>1</sup>H NMR spectrum of **25b**.

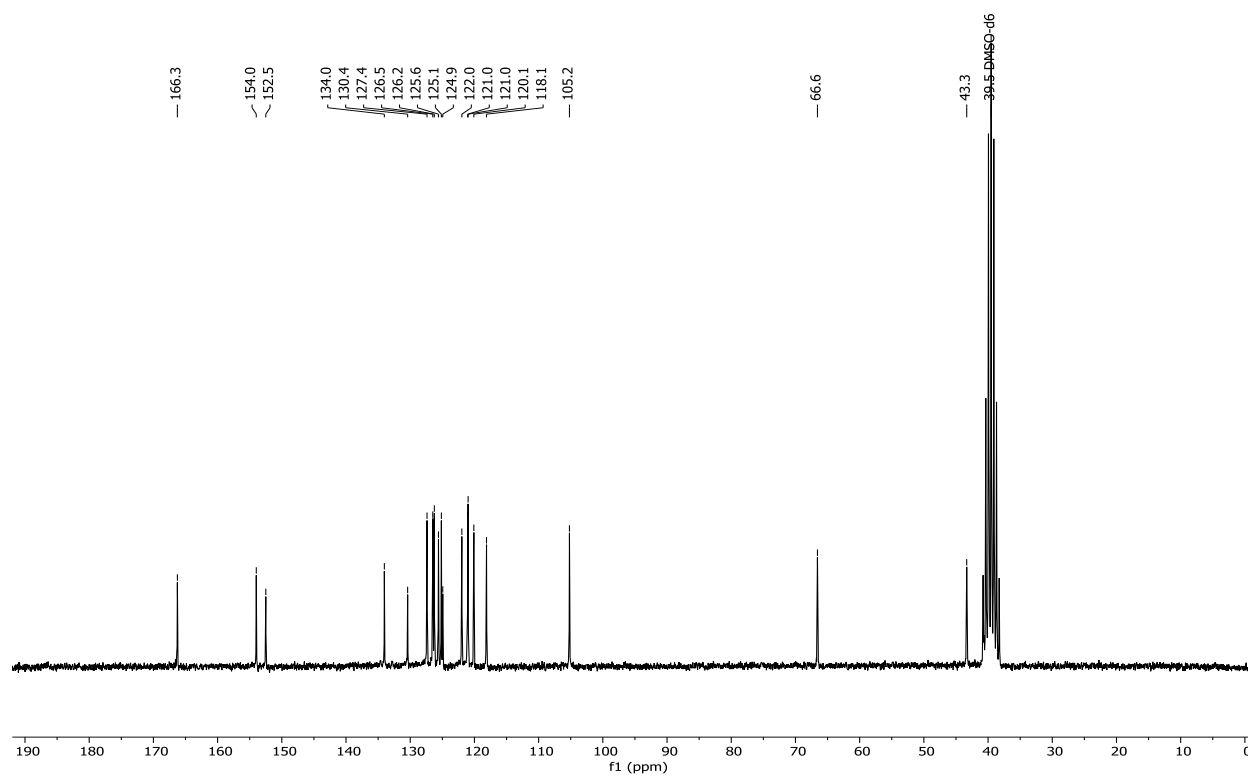

<sup>13</sup>C NMR spectrum of **25b**.



## HPLC traces

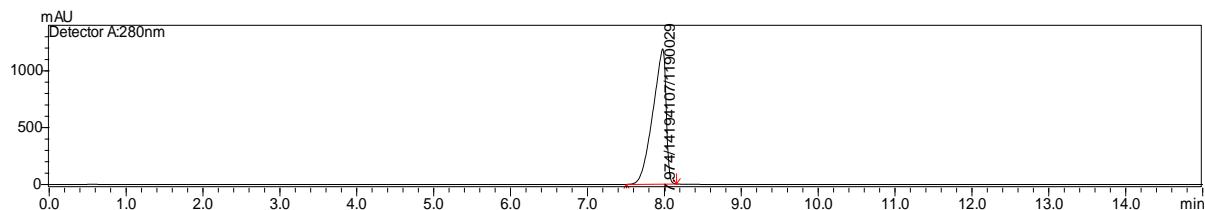

| Peak# | Ret. Time | Conc.   | Area     | Height  | Peak Start | Peak End | Area%    | Resolution | Tailing F. |
|-------|-----------|---------|----------|---------|------------|----------|----------|------------|------------|
| 1     | 7.974     | 0.00000 | 14194107 | 1190029 | 7.508      | 8.158    | 100.0000 | --         | 0.674      |

**Figure S2:** HPLC chromatogram of inhibitor **19d** (GK593) [500 ppm, H<sub>2</sub>O/acetonitrile 65/35 v/v, gradient to 40:60 v/v for 15 min, 35 °C, 1 mL/min, Detector: 280 nm, Column: Thermo Scientific, Hypersil Silica (250 × 4.6 mm, 5 μm)].

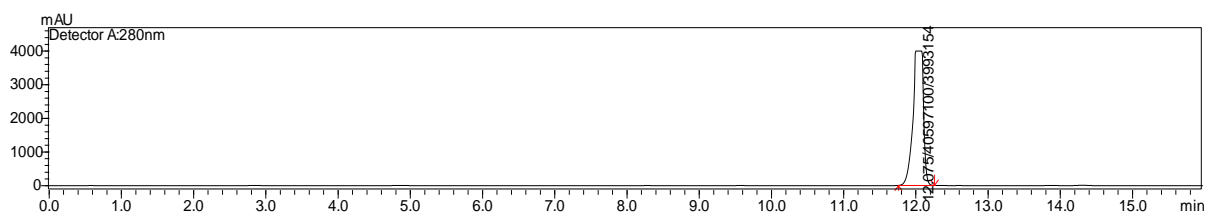

| Peak# | Ret. Time | Conc.   | Area     | Height  | Peak Start | Peak End | Area%    | Resolution | Tailing F. |
|-------|-----------|---------|----------|---------|------------|----------|----------|------------|------------|
| 1     | 12.075    | 0.00000 | 40597100 | 3993154 | 11.758     | 12.258   | 100.0000 | --         | 0.699      |

**Figure S3:** HPLC chromatogram of inhibitor **5b** (GK510) [500 ppm, H<sub>2</sub>O/acetonitrile 70/30 v/v, gradient to 40:60 v/v for 15 min, 35 °C, 1 mL/min, Detector: 280 nm, Column: Thermo Scientific, Hypersil Silica (250 × 4.6 mm, 5 μm)].

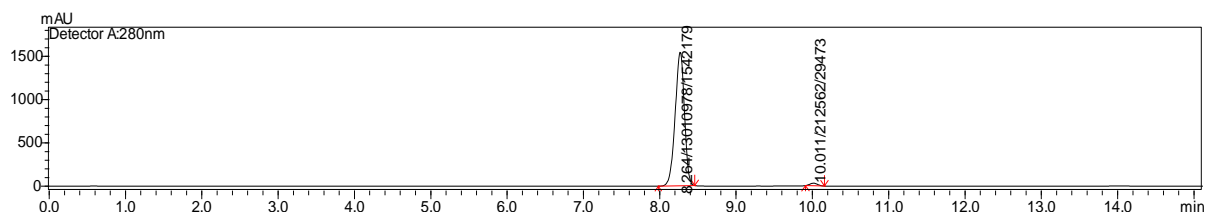

| Peak# | Ret. Time | Conc.   | Area     | Height  | Peak Start | Peak End | Area%   | Resolution | Tailing F. |
|-------|-----------|---------|----------|---------|------------|----------|---------|------------|------------|
| 1     | 8.264     | 0.00000 | 13010978 | 1542179 | 7.983      | 8.458    | 98.3925 | --         | 0.941      |
| 2     | 10.011    | 0.00000 | 212562   | 29473   | 9.908      | 10.158   | 1.6075  | 7.955      | 1.149      |

**Figure S4:** HPLC chromatogram of inhibitor **11** (GK521) [500 ppm, H<sub>2</sub>O/acetonitrile 70/30 v/v, gradient to 40:60 v/v for 15 min, 35 °C, 1 mL/min, Detector: 280 nm, Column: Thermo Scientific, Hypersil Silica (250 × 4.6 mm, 5 μm)].

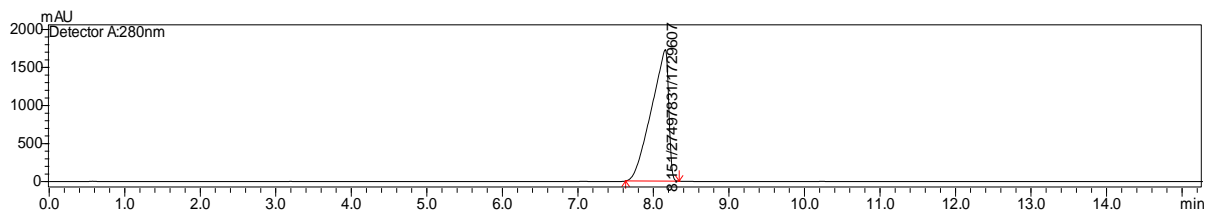

| Peak# | Ret. Time | Conc.   | Area     | Height  | Peak Start | Peak End | Area%    | Resolution | Tailing F. |
|-------|-----------|---------|----------|---------|------------|----------|----------|------------|------------|
| 1     | 8.151     | 0.00000 | 27497831 | 1729607 | 7.633      | 8.342    | 100.0000 | --         | 0.628      |

**Figure S5:** HPLC chromatogram of inhibitor **19a** (GK543) [500 ppm, H<sub>2</sub>O/acetonitrile 65/35 v/v, gradient to 40:60 v/v for 15 min, 35 °C, 1 mL/min, Detector: 280 nm, Column: Thermo Scientific, Hypersil Silica (250 × 4.6 mm, 5 μm)].

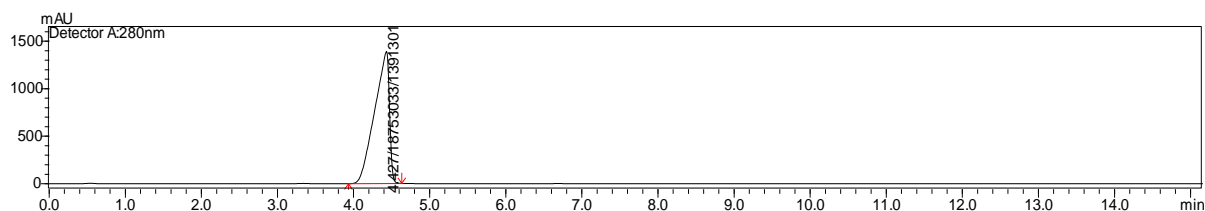

| Peak# | Ret. Time | Conc.   | Area     | Height  | Peak Start | Peak End | Area%    | Resolution | Tailing F. |
|-------|-----------|---------|----------|---------|------------|----------|----------|------------|------------|
| 1     | 4.427     | 0.00000 | 18753033 | 1391301 | 3.933      | 4.633    | 100.0000 | --         | 0.641      |

**Figure S6:** HPLC chromatogram of inhibitor **19c** (GK560) [500 ppm, H<sub>2</sub>O/acetonitrile 65/35 v/v, gradient to 40:60 v/v for 15 min, 35 °C, 1 mL/min, Detector: 280 nm, Column: Thermo Scientific, Hypersil Silica (250 × 4.6 mm, 5 μm)].

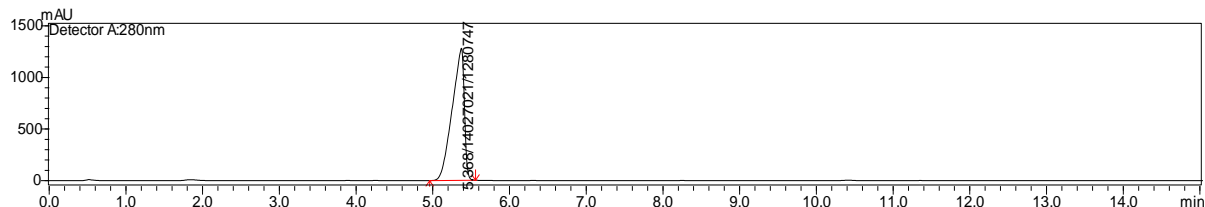

| Peak# | Ret. Time | Conc.   | Area     | Height  | Peak Start | Peak End | Area%    | Resolution | Tailing F. |
|-------|-----------|---------|----------|---------|------------|----------|----------|------------|------------|
| 1     | 5.368     | 0.00000 | 14027021 | 1280747 | 4.958      | 5.558    | 100.0000 | --         | 0.679      |

**Figure S7:** HPLC chromatogram of inhibitor **19b** (GK562) [500 ppm, H<sub>2</sub>O/acetonitrile 70/30 v/v, gradient to 40:60 v/v for 15 min, 35 °C, 1 mL/min, Detector: 280 nm, Column: Thermo Scientific, Hypersil Silica (250 × 4.6 mm, 5 μm)].

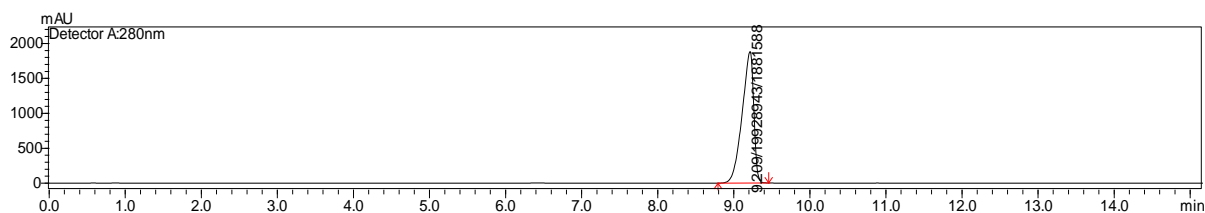

| Peak# | Ret. Time | Conc.   | Area     | Height  | Peak Start | Peak End | Area%    | Resolution | Tailing F. |
|-------|-----------|---------|----------|---------|------------|----------|----------|------------|------------|
| 1     | 9.209     | 0.00000 | 19928943 | 1881588 | 8.792      | 9.458    | 100.0000 | --         | 0.741      |

**Figure S8:** HPLC chromatogram of inhibitor **23a** (GK566) [500 ppm, H<sub>2</sub>O/acetonitrile 65/35 v/v, gradient to 40:60 v/v for 15 min, 35 °C, 1 mL/min, Detector: 280 nm, Column: Thermo Scientific, Hypersil Silica (250 × 4.6 mm, 5 μm)].

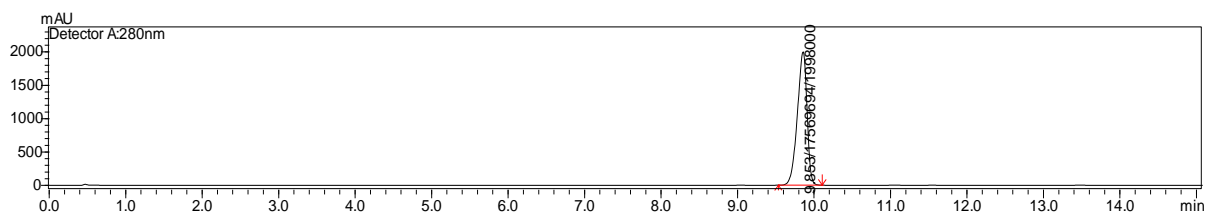

| Peak# | Ret. Time | Conc.   | Area     | Height  | Peak Start | Peak End | Area%    | Resolution | Tailing F. |
|-------|-----------|---------|----------|---------|------------|----------|----------|------------|------------|
| 1     | 9.853     | 0.00000 | 17569694 | 1998000 | 9.533      | 10.108   | 100.0000 | --         | 0.854      |

**Figure S9:** HPLC chromatogram of inhibitor **23c** (GK592) [500 ppm, H<sub>2</sub>O/acetonitrile 70/30 v/v, gradient to 40:60 v/v for 15 min, 35 °C, 1 mL/min, Detector: 280 nm, Column: Thermo Scientific, Hypersil Silica (250 × 4.6 mm, 5 μm)].

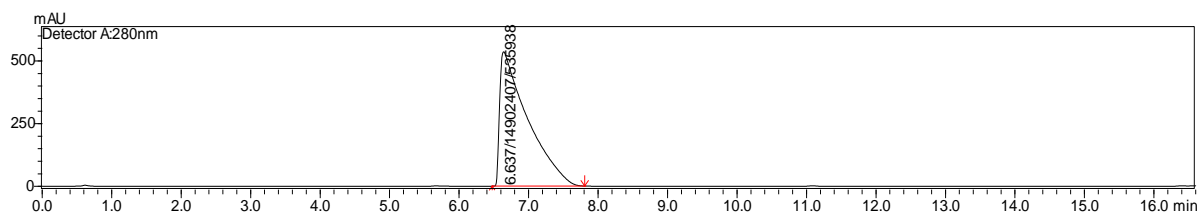

| Peak# | Ret. Time | Conc.   | Area     | Height | Peak Start | Peak End | Area%    | Resolution | Tailing F. |
|-------|-----------|---------|----------|--------|------------|----------|----------|------------|------------|
| 1     | 6.637     | 0.00000 | 14902407 | 535938 | 6.475      | 7.808    | 100.0000 | --         | 5.189      |

**Figure S10:** HPLC chromatogram of inhibitor **19e** (GK610) [500 ppm, H<sub>2</sub>O/acetonitrile 85/15 v/v, gradient to 55:45 v/v for 15 min, 35 °C, 1 mL/min, Detector: 280 nm, Column: Thermo Scientific, Hypersil Silica (250 × 4.6 mm, 5 μm)].
